# Supplementary material
Source: publisher figshare collection journal article supplement (https://gsajournals.figshare.com/ndownloader/files/24146210)
Supplement: Supplementary file 1 [file 24146210]

## Sheet: 200718_Supplementary_Data_2
PIR value of Intron retention events across all timepoints
Intron_ID	Cluster_ID	GeneName	TP_1	TP_2	TP_3	TP_4	TP_5	TP_6	TP_7	TP_8	TP_9	TP_10	TP_11	TP_11.5	TP_12	TP_12.5	TP_13	TP_13.5	TP_14	TP_14.5	TP_15	TP_16	TP_17	TP_18	TP_19	TP_20	TP_21	TP_22	TP_23	TP_24
chromosome_1:1025552-1025772	N1	Cre01.g005900.v5.5	0.01	0.01	0.01	0.01	0.01	0.01	0.01	0.01	0.01	0.01	0.01	0.01	0.01	0.1234	0.0826	0.089	0.0513	0.1295	0.0784	0.01	0.0974	0.01	0.01	0.01	0.01	0.01	0.01	0.01
chromosome_1:1043384-1043576	N7	Cre01.g006050.v5.5	0.01	0.01	0.01	0.3011	0.01	0.01	0.3607	0.1846	0.254	0.01	0.2283	0.01	0.01	0.45	0.3106	0.3577	0.3416	0.01	0.4089	0.4408	0.5417	0.3597	0.3841	0.5179	0.3064	0.2791	0.2367	0.5139
chromosome_1:1043894-1044172	N1	Cre01.g006050.v5.5	0.01	0.01	0.01	0.01	0.01	0.01	0.01	0.01	0.01	0.01	0.01	0.01	0.01	0.01	0.01	0.01	0.01	0.01	0.01	0.01	0.01	0.01	0.01	0.0785	0.01	0.01	0.01	0.01
chromosome_1:1445923-1446133	N1	Cre01.g007300.v5.5	0.01	0.01	0.01	0.01	0.01	0.01	0.01	0.01	0.01	0.01	0.01	0.01	0.01	0.01	0.01	0.01	0.01	0.01	0.01	0.01	0.01	0.01	0.3548	0.01	0.01	0.01	0.01	0.01
chromosome_1:1525944-1526203	N1	Cre01.g007901.v5.5	0.01	0.01	0.01	0.01	0.01	0.01	0.01	0.01	0.01	0.01	0.01	0.01	0.01	0.01	0.01	0.01	0.01	0.01	0.01	0.01	0.01	0.01	0.01	0.01	0.01	0.01	0.0706	0.01
chromosome_1:1526258-1526596	N1	Cre01.g007901.v5.5	0.01	0.01	0.01	0.01	0.01	0.01	0.01	0.01	0.01	0.01	0.01	0.01	0.01	0.01	0.01	0.01	0.01	0.01	0.01	0.01	0.01	0.01	0.01	0.0455	0.098	0.1299	0.1409	0.01
chromosome_1:1542252-1542583	N6	Cre01.g008000.v5.5	0.01	0.01	0.01	0.01	0.01	0.01	0.01	0.01	0.01	0.01	0.01	0.01	0.01	0.01	0.1392	0.2717	0.0988	0.01	0.01	0.01	0.01	0.01	0.2432	0.01	0.01	0.6458	0.5905	0.5185
chromosome_1:1854470-1854638	N1	Cre01.g010100.v5.5	0.01	0.01	0.01	0.01	0.01	0.01	0.01	0.01	0.01	0.01	0.01	0.01	0.01	0.01	0.01	0.01	0.01	0.01	0.01	0.01	0.01	0.01	0.01	0.0324	0.0874	0.0389	0.0347	0.01
chromosome_1:1855167-1855341	N1	Cre01.g010100.v5.5	0.01	0.01	0.01	0.01	0.01	0.01	0.01	0.01	0.01	0.01	0.01	0.01	0.01	0.01	0.01	0.01	0.0334	0.01	0.01	0.01	0.01	0.01	0.01	0.01	0.0582	0.0315	0.01	0.01
chromosome_1:2014129-2014419	N1	Cre01.g010848.v5.5	0.0511	0.01	0.01	0.01	0.01	0.01	0.01	0.01	0.01	0.01	0.01	0.01	0.01	0.01	0.01	0.01	0.01	0.01	0.01	0.01	0.01	0.01	0.01	0.01	0.01	0.01	0.01	0.01
chromosome_1:2062543-2062645	N1	Cre01.g011050.v5.5	0.01	0.01	0.01	0.01	0.01	0.01	0.01	0.01	0.01	0.01	0.01	0.01	0.01	0.01	0.01	0.06	0.01	0.01	0.0429	0.01	0.01	0.0622	0.0625	0.0251	0.01	0.01	0.01	0.01
chromosome_1:2290182-2290345	N1	Cre01.g012500.v5.5	0.01	0.01	0.01	0.01	0.01	0.01	0.01	0.01	0.01	0.01	0.01	0.01	0.01	0.01	0.01	0.01	0.01	0.01	0.01	0.01	0.01	0.01	0.01	0.01	0.0756	0.032	0.0473	0.01
chromosome_1:2451937-2452015	N1	Cre01.g013769.v5.5	0.01	0.01	0.01	0.01	0.01	0.01	0.01	0.01	0.01	0.01	0.01	0.01	0.01	0.01	0.071	0.0779	0.01	0.1183	0.1221	0.0753	0.01	0.01	0.01	0.01	0.01	0.01	0.1071	0.01
chromosome_1:2452081-2452210	N1	Cre01.g013769.v5.5	0.01	0.01	0.01	0.01	0.01	0.01	0.01	0.01	0.01	0.01	0.01	0.01	0.01	0.01	0.0583	0.01	0.0749	0.01	0.0822	0.01	0.01	0.01	0.01	0.01	0.01	0.01	0.01	0.01
chromosome_1:2469551-2469622	N5	Cre01.g013900.v5.5	0.1224	0.01	0.01	0.01	0.01	0.01	0.01	0.01	0.01	0.01	0.01	0.01	0.01	0.01	0.1293	0.4138	0.01	0.01	0.1829	0.01	0.2364	0.01	0.01	0.01	0.1569	0.01	0.1429	0.01
chromosome_1:2516233-2517113	N2	Cre01.g014400.v5.5	0.01	0.01	0.01	0.01	0.01	0.3388	0.3411	0.33	0.25	0.01	0.01	0.01	0.01	0.01	0.01	0.01	0.01	0.01	0.01	0.01	0.01	0.01	0.01	0.01	0.4634	0.01	0.01	0.01
chromosome_1:2533850-2534166	N5	Cre01.g014500.v5.5	0.01	0.01	0.01	0.01	0.01	0.01	0.01	0.01	0.01	0.01	0.01	0.01	0.01	0.01	0.1453	0.01	0.082	0.01	0.01	0.2254	0.01	0.01	0.01	0.01	0.129	0.01	0.1403	0.168
chromosome_1:2538144-2538290	N1	Cre01.g014600.v5.5	0.01	0.01	0.01	0.01	0.01	0.01	0.01	0.01	0.01	0.01	0.01	0.01	0.01	0.01	0.01	0.01	0.01	0.01	0.01	0.01	0.01	0.01	0.01	0.1418	0.01	0.01	0.101	0.1739
chromosome_1:2648860-2649065	N1	Cre01.g015500.v5.5	0.01	0.01	0.01	0.01	0.01	0.01	0.01	0.01	0.01	0.01	0.01	0.01	0.01	0.01	0.01	0.01	0.01	0.01	0.01	0.01	0.01	0.01	0.01	0.01	0.0632	0.0496	0.01	0.01
chromosome_1:2832160-2832441	N1	Cre01.g016950.v5.5	0.01	0.01	0.01	0.01	0.01	0.01	0.01	0.01	0.01	0.01	0.01	0.01	0.01	0.01	0.01	0.0369	0.0401	0.01	0.01	0.01	0.01	0.0577	0.01	0.01	0.01	0.01	0.01	0.01
chromosome_1:2881901-2882234	N1	Cre01.g017500.v5.5	0.0204	0.01	0.01	0.01	0.01	0.01	0.01	0.01	0.01	0.01	0.01	0.01	0.01	0.01	0.01	0.01	0.01	0.01	0.01	0.01	0.01	0.01	0.01	0.01	0.01	0.1123	0.01	0.01
chromosome_1:2994366-2994492	N1	Cre01.g018400.v5.5	0.01	0.01	0.01	0.01	0.01	0.01	0.01	0.01	0.01	0.01	0.0524	0.01	0.01	0.01	0.01	0.01	0.01	0.01	0.01	0.01	0.01	0.01	0.01	0.01	0.01	0.0323	0.01	0.01
chromosome_1:2996534-2996813	N5	Cre01.g018400.v5.5	0.01	0.01	0.01	0.01	0.01	0.01	0.01	0.01	0.01	0.01	0.01	0.01	0.01	0.01	0.01	0.01	0.01	0.01	0.01	0.01	0.2895	0.01	0.2024	0.2434	0.1724	0.01	0.112	0.1983
chromosome_1:2997629-2997801	N5	Cre01.g018450.v5.5	0.01	0.01	0.01	0.01	0.01	0.01	0.01	0.01	0.01	0.01	0.01	0.01	0.01	0.01	0.01	0.1176	0.01	0.01	0.01	0.01	0.01	0.01	0.1127	0.1667	0.3111	0.01	0.2566	0.01
chromosome_1:3017028-3017202	N5	Cre01.g018550.v5.5	0.01	0.01	0.01	0.01	0.01	0.01	0.01	0.01	0.01	0.01	0.01	0.01	0.01	0.01	0.1069	0.01	0.01	0.01	0.1389	0.01	0.1967	0.01	0.2368	0.01	0.01	0.01	0.123	0.1038
chromosome_1:309887-310724	N6	Cre01.g001750.v5.5	0.0995	0.01	0.01	0.01	0.01	0.01	0.01	0.01	0.01	0.01	0.01	0.01	0.01	0.01	0.2105	0.3628	0.2143	0.01	0.01	0.2468	0.25	0.2078	0.1835	0.1661	0.1467	0.1862	0.1932	0.1295
chromosome_1:3371215-3371433	N1	Cre01.g021400.v5.5	0.01	0.01	0.01	0.01	0.01	0.01	0.01	0.01	0.01	0.01	0.01	0.01	0.1429	0.01	0.01	0.01	0.01	0.01	0.01	0.01	0.01	0.01	0.01	0.01	0.01	0.01	0.01	0.01
chromosome_1:3515450-3515833	N1	Cre01.g022500.v5.5	0.01	0.01	0.01	0.01	0.01	0.01	0.01	0.01	0.01	0.01	0.01	0.01	0.01	0.01	0.123	0.01	0.1394	0.01	0.01	0.01	0.01	0.01	0.01	0.01	0.01	0.01	0.01	0.01
chromosome_1:3632872-3633065	N1	Cre01.g023400.v5.5	0.01	0.01	0.01	0.01	0.01	0.01	0.01	0.0381	0.01	0.01	0.01	0.01	0.01	0.01	0.01	0.01	0.01	0.01	0.01	0.01	0.01	0.01	0.01	0.01	0.01	0.0603	0.01	0.01
chromosome_1:3800216-3800349	N1	Cre01.g024550.v5.5	0.01	0.01	0.01	0.01	0.01	0.01	0.01	0.01	0.01	0.0567	0.01	0.01	0.01	0.01	0.01	0.01	0.0582	0.01	0.01	0.0863	0.01	0.0784	0.01	0.0424	0.01	0.0616	0.0647	0.01
chromosome_1:3800365-3800583	N1	Cre01.g024550.v5.5	0.01	0.01	0.01	0.01	0.01	0.01	0.01	0.01	0.01	0.01	0.01	0.01	0.01	0.01	0.0307	0.01	0.0572	0.01	0.01	0.01	0.0647	0.0882	0.01	0.0702	0.01	0.0628	0.0682	0.0734
chromosome_1:3871140-3871363	N5	Cre01.g025100.v5.5	0.01	0.01	0.0658	0.01	0.01	0.0351	0.0412	0.01	0.01	0.01	0.01	0.01	0.01	0.01	0.01	0.1154	0.0571	0.01	0.0918	0.01	0.0881	0.1383	0.1921	0.2082	0.1503	0.1239	0.2075	0.2281
chromosome_1:4055589-4056262	N5	Cre01.g026450.v5.5	0.0261	0.01	0.0209	0.01	0.01	0.0423	0.0397	0.0215	0.017	0.0146	0.0118	0.01	0.0177	0.0136	0.0126	0.0258	0.0382	0.0472	0.0759	0.1039	0.1236	0.1367	0.1884	0.2232	0.1555	0.01	0.1647	0.1966
chromosome_1:4133973-4134343	N1	Cre01.g027250.v5.5	0.01	0.01	0.01	0.01	0.01	0.01	0.01	0.01	0.01	0.01	0.01	0.01	0.01	0.01	0.01	0.01	0.01	0.01	0.01	0.01	0.01	0.1322	0.01	0.01	0.01	0.01	0.01	0.01
chromosome_1:4234815-4234953	N1	Cre01.g028350.v5.5	0.01	0.01	0.01	0.01	0.01	0.01	0.01	0.0621	0.01	0.01	0.01	0.01	0.01	0.01	0.01	0.01	0.01	0.01	0.01	0.01	0.01	0.01	0.01	0.01	0.01	0.01	0.01	0.01
chromosome_1:4271885-4272932	N1	Cre01.g028650.v5.5	0.01	0.01	0.01	0.01	0.01	0.01	0.01	0.0745	0.01	0.01	0.01	0.01	0.01	0.01	0.01	0.01	0.01	0.01	0.01	0.01	0.01	0.01	0.01	0.01	0.0719	0.01	0.01	0.01
chromosome_1:4274347-4274503	N2	Cre01.g028650.v5.5	0.2857	0.01	0.1957	0.01	0.01	0.0864	0.1186	0.0727	0.1407	0.2105	0.1	0.01	0.01	0.01	0.0694	0.0776	0.057	0.01	0.0813	0.01	0.0732	0.1583	0.1301	0.1331	0.126	0.1314	0.1333	0.1553
chromosome_1:4277979-4278128	N5	Cre01.g028650.v5.5	0.01	0.01	0.01	0.01	0.01	0.01	0.01	0.01	0.01	0.01	0.01	0.01	0.01	0.01	0.01	0.01	0.01	0.01	0.01	0.01	0.01	0.01	0.3265	0.01	0.01	0.0769	0.2414	0.3448
chromosome_1:4278316-4278587	N5	Cre01.g028650.v5.5	0.01	0.01	0.01	0.01	0.01	0.01	0.01	0.01	0.01	0.01	0.01	0.01	0.01	0.01	0.01	0.01	0.01	0.01	0.01	0.01	0.01	0.01	0.1857	0.01	0.1445	0.1336	0.1563	0.01
chromosome_1:4278629-4278819	N5	Cre01.g028650.v5.5	0.01	0.01	0.01	0.01	0.01	0.01	0.01	0.01	0.01	0.01	0.01	0.01	0.01	0.01	0.01	0.01	0.01	0.01	0.01	0.01	0.01	0.01	0.01	0.0756	0.1533	0.1368	0.129	0.2394
chromosome_1:4403233-4403463	N5	Cre01.g029850.v5.5	0.01	0.01	0.01	0.01	0.01	0.01	0.01	0.01	0.01	0.01	0.01	0.01	0.01	0.01	0.0859	0.1085	0.102	0.01	0.1374	0.01	0.01	0.1328	0.1818	0.1329	0.1686	0.3346	0.1612	0.1156
chromosome_1:4474470-4474622	N2	Cre01.g030450.v5.5	0.01	0.01	0.01	0.2845	0.01	0.11	0.1895	0.1624	0.25	0.01	0.1835	0.1358	0.0839	0.0827	0.1092	0.01	0.142	0.01	0.1832	0.01	0.2105	0.1875	0.01	0.2288	0.01	0.1022	0.114	0.165
chromosome_1:4502890-4503049	N5	Cre01.g030650.v5.5	0.01	0.01	0.01	0.01	0.01	0.01	0.2615	0.01	0.01	0.01	0.01	0.01	0.01	0.01	0.01	0.01	0.01	0.01	0.01	0.01	0.01	0.01	0.01	0.01	0.01	0.01	0.2464	0.2113
chromosome_1:4528617-4529164	N1	Cre01.g030850.v5.5	0.1053	0.01	0.01	0.01	0.01	0.01	0.01	0.01	0.01	0.01	0.01	0.01	0.01	0.01	0.01	0.01	0.01	0.01	0.01	0.01	0.01	0.01	0.01	0.01	0.01	0.01	0.01	0.01
chromosome_1:4536565-4536786	N1	Cre01.g030950.v5.5	0.01	0.01	0.01	0.01	0.01	0.01	0.01	0.01	0.01	0.01	0.01	0.01	0.01	0.01	0.01	0.01	0.01	0.01	0.01	0.01	0.01	0.01	0.0735	0.01	0.01	0.01	0.01	0.01
chromosome_1:4551774-4552234	N1	Cre01.g031050.v5.5	0.01	0.01	0.01	0.01	0.01	0.01	0.0695	0.01	0.01	0.01	0.01	0.01	0.01	0.01	0.01	0.01	0.01	0.01	0.01	0.01	0.01	0.01	0.01	0.01	0.01	0.01	0.01	0.01
chromosome_1:4700649-4701073	N1	Cre01.g032400.v5.5	0.01	0.01	0.01	0.01	0.01	0.01	0.01	0.01	0.01	0.01	0.01	0.01	0.01	0.01	0.01	0.01	0.01	0.01	0.01	0.01	0.01	0.01	0.01	0.128	0.01	0.01	0.01	0.01
chromosome_1:4746480-4746593	N5	Cre01.g032800.v5.5	0.0897	0.01	0.1067	0.01	0.01	0.1429	0.01	0.01	0.01	0.1833	0.1	0.01	0.01	0.01	0.0884	0.1477	0.1373	0.01	0.1875	0.01	0.01	0.01	0.1933	0.01	0.01	0.01	0.0711	0.1014
chromosome_1:48030-48176	N5	Cre01.g000200.v5.5	0.01	0.01	0.01	0.01	0.01	0.1647	0.01	0.01	0.01	0.2105	0.01	0.01	0.01	0.01	0.01	0.2297	0.1635	0.01	0.0707	0.01	0.01	0.18	0.1149	0.1316	0.2615	0.1549	0.2237	0.1071
chromosome_1:48572-48890	N1	Cre01.g000200.v5.5	0.01	0.01	0.01	0.01	0.01	0.01	0.01	0.01	0.01	0.01	0.01	0.01	0.01	0.01	0.01	0.01	0.01	0.01	0.01	0.1531	0.01	0.01	0.01	0.01	0.01	0.01	0.01	0.1452
chromosome_1:4939606-4939980	N1	Cre01.g034150.v5.5	0.01	0.01	0.01	0.01	0.01	0.01	0.01	0.01	0.01	0.01	0.01	0.01	0.01	0.01	0.01	0.01	0.01	0.01	0.01	0.01	0.01	0.01	0.01	0.01	0.01	0.0918	0.01	0.01
chromosome_1:50674-50831	N1	Cre01.g000200.v5.5	0.01	0.01	0.01	0.01	0.01	0.01	0.01	0.01	0.01	0.01	0.01	0.01	0.01	0.01	0.01	0.01	0.01	0.01	0.01	0.01	0.01	0.01	0.01	0.01	0.01	0.01	0.125	0.01
chromosome_1:5233061-5233526	N1	Cre01.g036400.v5.5	0.01	0.01	0.01	0.01	0.01	0.01	0.01	0.01	0.01	0.01	0.01	0.01	0.01	0.01	0.01	0.01	0.0251	0.01	0.0422	0.01	0.01	0.01	0.01	0.0742	0.0722	0.01	0.01	0.01
chromosome_1:5237396-5237574	N1	Cre01.g036451.v5.5	0.01	0.01	0.01	0.01	0.01	0.01	0.01	0.01	0.01	0.01	0.01	0.01	0.1633	0.01	0.01	0.01	0.01	0.01	0.01	0.01	0.01	0.01	0.01	0.01	0.01	0.01	0.01	0.01
chromosome_1:5283799-5284259	N6	Cre01.g036900.v5.5	0.01	0.01	0.01	0.01	0.01	0.01	0.01	0.01	0.01	0.01	0.01	0.01	0.01	0.01	0.1727	0.1786	0.1905	0.01	0.01	0.3418	0.3944	0.4048	0.3971	0.3547	0.3471	0.215	0.2249	0.3103
chromosome_1:5295460-5295934	N7	Cre01.g037000.v5.5	0.01	0.01	0.5319	0.5107	0.6098	0.5256	0.5455	0.4326	0.4011	0.4087	0.2738	0.01	0.2426	0.2877	0.3125	0.01	0.3204	0.01	0.2949	0.01	0.01	0.4103	0.01	0.3294	0.2143	0.01	0.3871	0.01
chromosome_1:5422948-5423224	N5	Cre01.g038100.v5.5	0.01	0.01	0.01	0.01	0.01	0.0518	0.01	0.01	0.01	0.01	0.01	0.01	0.0414	0.1071	0.0997	0.1243	0.0677	0.1	0.08	0.1196	0.1327	0.1015	0.1293	0.1285	0.0607	0.0794	0.0826	0.115
chromosome_1:5423266-5423464	N1	Cre01.g038100.v5.5	0.01	0.01	0.01	0.01	0.01	0.01	0.01	0.01	0.01	0.01	0.01	0.01	0.01	0.01	0.01	0.0614	0.01	0.01	0.0614	0.01	0.01	0.01	0.01	0.0627	0.01	0.01	0.0379	0.0892
chromosome_1:5427135-5427418	N1	Cre01.g038100.v5.5	0.01	0.01	0.01	0.01	0.01	0.01	0.01	0.01	0.01	0.01	0.01	0.01	0.01	0.01	0.01	0.01	0.01	0.01	0.01	0.01	0.01	0.01	0.01	0.01	0.01	0.0699	0.01	0.01
chromosome_1:5445053-5445231	N1	Cre01.g038250.v5.5	0.01	0.01	0.01	0.01	0.01	0.01	0.01	0.01	0.01	0.01	0.01	0.01	0.01	0.01	0.01	0.01	0.01	0.01	0.01	0.01	0.01	0.01	0.01	0.01	0.0212	0.057	0.01	0.01
chromosome_1:5445736-5445909	N1	Cre01.g038250.v5.5	0.01	0.01	0.01	0.01	0.01	0.01	0.01	0.01	0.01	0.01	0.01	0.01	0.01	0.01	0.01	0.01	0.01	0.01	0.01	0.01	0.01	0.01	0.01	0.01	0.0765	0.0481	0.01	0.01
chromosome_1:5490335-5490541	N2	Cre01.g038700.v5.5	0.01	0.01	0.01	0.1915	0.2549	0.1705	0.1444	0.141	0.01	0.01	0.01	0.1398	0.01	0.01	0.1684	0.01	0.01	0.01	0.1667	0.01	0.2222	0.2	0.1954	0.01	0.01	0.1493	0.3016	0.2468
chromosome_1:55253-55442	N1	Cre01.g000300.v5.5	0.01	0.01	0.01	0.01	0.01	0.01	0.01	0.01	0.01	0.01	0.01	0.01	0.01	0.01	0.01	0.01	0.01	0.01	0.01	0.01	0.01	0.01	0.01	0.01	0.1353	0.1451	0.01	0.01
chromosome_1:5622227-5622486	N5	Cre01.g039950.v5.5	0.01	0.01	0.01	0.01	0.01	0.01	0.01	0.01	0.01	0.01	0.01	0.01	0.01	0.01	0.2416	0.01	0.2679	0.01	0.01	0.01	0.01	0.1042	0.127	0.1179	0.1203	0.1243	0.1061	0.01
chromosome_1:5623034-5623316	N1	Cre01.g039950.v5.5	0.01	0.01	0.01	0.01	0.01	0.01	0.01	0.01	0.01	0.01	0.01	0.01	0.01	0.01	0.01	0.01	0.01	0.01	0.01	0.01	0.01	0.01	0.01	0.01	0.01	0.01	0.087	0.01
chromosome_1:5625990-5626170	N1	Cre01.g039950.v5.5	0.01	0.01	0.01	0.01	0.01	0.01	0.01	0.01	0.01	0.01	0.01	0.01	0.01	0.01	0.01	0.01	0.01	0.01	0.01	0.01	0.01	0.01	0.01	0.01	0.01	0.01	0.084	0.01
chromosome_1:5713294-5713360	N5	Cre01.g040701.v5.5	0.01	0.01	0.01	0.01	0.01	0.01	0.0787	0.1008	0.1256	0.0891	0.0662	0.1221	0.0808	0.0677	0.0736	0.0742	0.0817	0.0879	0.0819	0.0782	0.0952	0.1041	0.0452	0.0611	0.065	0.01	0.0965	0.01
chromosome_1:5792879-5794492	N6	Cre01.g041400.v5.5	0.01	0.01	0.01	0.01	0.01	0.01	0.01	0.2045	0.01	0.01	0.01	0.01	0.01	0.01	0.01	0.01	0.01	0.01	0.01	0.01	0.3559	0.292	0.01	0.2553	0.3162	0.3458	0.3438	0.1908
chromosome_1:5805885-5805964	N1	Cre01.g041450.v5.5	0.01	0.01	0.01	0.01	0.01	0.01	0.01	0.01	0.01	0.01	0.01	0.01	0.01	0.01	0.01	0.01	0.01	0.01	0.01	0.01	0.01	0.01	0.01	0.0556	0.01	0.01	0.01	0.1204
chromosome_1:6095429-6095697	N1	Cre01.g043500.v5.5	0.01	0.01	0.01	0.01	0.01	0.01	0.01	0.01	0.01	0.01	0.01	0.01	0.01	0.01	0.01	0.01	0.01	0.01	0.01	0.01	0.01	0.01	0.01	0.01	0.01	0.01	0.0755	0.1
chromosome_1:6096138-6096278	N5	Cre01.g043500.v5.5	0.01	0.01	0.01	0.01	0.01	0.01	0.01	0.01	0.01	0.01	0.01	0.01	0.01	0.01	0.01	0.01	0.0815	0.01	0.0921	0.01	0.2443	0.1532	0.1429	0.1725	0.1361	0.01	0.1961	0.1418
chromosome_1:6096358-6096652	N5	Cre01.g043500.v5.5	0.01	0.01	0.01	0.01	0.01	0.01	0.01	0.01	0.01	0.01	0.01	0.01	0.01	0.01	0.01	0.01	0.0747	0.01	0.1288	0.198	0.3333	0.189	0.177	0.01	0.1811	0.1304	0.1687	0.1287
chromosome_1:6266507-6266659	N1	Cre01.g044800.v5.5	0.01	0.01	0.0509	0.01	0.01	0.01	0.0235	0.0237	0.01	0.0065	0.0149	0.01	0.0087	0.0047	0.01	0.01	0.01	0.01	0.01	0.01	0.01	0.01	0.01	0.01	0.009	0.014	0.01	0.01
chromosome_1:6704576-6704814	N1	Cre01.g048150.v5.5	0.01	0.01	0.01	0.01	0.01	0.0156	0.0116	0.0349	0.0309	0.01	0.01	0.0726	0.0215	0.01	0.0268	0.01	0.01	0.01	0.01	0.01	0.01	0.01	0.01	0.01	0.0272	0.01	0.01	0.01
chromosome_1:6706071-6706197	N1	Cre01.g048150.v5.5	0.01	0.01	0.01	0.01	0.01	0.01	0.0245	0.0408	0.01	0.01	0.01	0.0578	0.01	0.01	0.01	0.01	0.01	0.01	0.01	0.01	0.01	0.01	0.01	0.01	0.01	0.01	0.01	0.01
chromosome_1:6742772-6743019	N1	Cre01.g048450.v5.5	0.01	0.01	0.01	0.01	0.01	0.01	0.01	0.01	0.01	0.01	0.01	0.01	0.01	0.01	0.01	0.01	0.01	0.01	0.01	0.01	0.01	0.01	0.01	0.01	0.01	0.1863	0.01	0.01
chromosome_1:6743192-6743453	N1	Cre01.g048450.v5.5	0.01	0.01	0.01	0.01	0.01	0.01	0.01	0.01	0.01	0.01	0.01	0.01	0.01	0.01	0.01	0.01	0.01	0.01	0.01	0.01	0.01	0.01	0.01	0.01	0.01	0.0936	0.01	0.01
chromosome_1:6993189-6993511	N1	Cre01.g050500.v5.5	0.1022	0.01	0.01	0.01	0.01	0.01	0.01	0.01	0.01	0.01	0.01	0.01	0.01	0.01	0.01	0.01	0.01	0.01	0.01	0.01	0.01	0.01	0.01	0.01	0.01	0.01	0.01	0.01
chromosome_1:7052807-7052911	N6	Cre01.g050900.v5.5	0.01	0.01	0.2195	0.1259	0.01	0.01	0.1667	0.2051	0.01	0.01	0.01	0.01	0.01	0.1781	0.2703	0.225	0.1983	0.01	0.1863	0.01	0.2656	0.3	0.01	0.2119	0.2727	0.1395	0.1716	0.01
chromosome_1:7063705-7064009	N5	Cre01.g051000.v5.5	0.01	0.01	0.01	0.01	0.01	0.01	0.01	0.01	0.01	0.01	0.01	0.01	0.01	0.01	0.01	0.01	0.0408	0.01	0.0479	0.01	0.0914	0.0981	0.1111	0.01	0.087	0.1034	0.1429	0.1554
chromosome_1:7064139-7064351	N1	Cre01.g051000.v5.5	0.01	0.01	0.0469	0.01	0.01	0.01	0.01	0.01	0.01	0.01	0.01	0.01	0.01	0.01	0.035	0.01	0.01	0.01	0.01	0.01	0.0591	0.01	0.0632	0.0693	0.0395	0.01	0.01	0.0622
chromosome_1:7076737-7076900	N1	Cre01.g051100.v5.5	0.1863	0.01	0.01	0.01	0.01	0.2254	0.01	0.01	0.01	0.01	0.01	0.01	0.01	0.01	0.01	0.01	0.01	0.01	0.01	0.01	0.01	0.01	0.01	0.01	0.01	0.01	0.01	0.01
chromosome_1:7111134-7111395	N1	Cre01.g051400.v5.5	0.01	0.01	0.01	0.01	0.01	0.01	0.01	0.01	0.01	0.01	0.01	0.01	0.01	0.01	0.01	0.01	0.01	0.01	0.01	0.01	0.01	0.01	0.01	0.01	0.2261	0.2154	0.0404	0.01
chromosome_1:7111469-7111720	N1	Cre01.g051400.v5.5	0.01	0.01	0.01	0.01	0.01	0.01	0.01	0.01	0.01	0.01	0.01	0.01	0.01	0.01	0.01	0.01	0.01	0.01	0.01	0.01	0.01	0.01	0.01	0.01	0.01	0.05	0.01	0.01
chromosome_1:7508905-7509216	N1	Cre01.g054050.v5.5	0.01	0.01	0.01	0.0249	0.01	0.01	0.01	0.0532	0.01	0.01	0.01	0.01	0.01	0.01	0.01	0.01	0.01	0.01	0.01	0.01	0.01	0.01	0.01	0.01	0.01	0.01	0.01	0.01
chromosome_1:7634174-7634777	N1	Cre01.g055250.v5.5	0.01	0.01	0.01	0.01	0.01	0.01	0.01	0.01	0.01	0.01	0.0919	0.01	0.01	0.01	0.01	0.01	0.01	0.01	0.01	0.01	0.01	0.01	0.01	0.01	0.01	0.01	0.01	0.01
chromosome_1:7947615-7947736	N1	Cre01.g066187.v5.5	0.01	0.01	0.01	0.01	0.01	0.0619	0.01	0.01	0.01	0.01	0.01	0.01	0.01	0.01	0.01	0.01	0.01	0.01	0.01	0.01	0.01	0.01	0.01	0.01	0.01	0.01	0.01	0.01
chromosome_1:7968154-7968429	N1	Cre01.g068012.v5.5	0.01	0.01	0.01	0.01	0.01	0.01	0.01	0.01	0.01	0.01	0.01	0.01	0.01	0.01	0.01	0.01	0.0647	0.01	0.01	0.01	0.0769	0.01	0.01	0.01	0.01	0.01	0.01	0.01
chromosome_1:7970886-7971096	N5	Cre01.g068377.v5.5	0.01	0.01	0.01	0.01	0.01	0.01	0.01	0.01	0.01	0.01	0.01	0.01	0.01	0.01	0.01	0.01	0.01	0.01	0.01	0.01	0.01	0.1085	0.1271	0.1098	0.0872	0.1707	0.1531	0.1228
chromosome_1:7975048-7975316	N2	Cre01.g068377.v5.5	0.09	0.01	0.1176	0.01	0.2459	0.1739	0.1912	0.1961	0.01	0.01	0.01	0.01	0.01	0.01	0.0473	0.01	0.05	0.01	0.01	0.01	0.01	0.01	0.0936	0.01	0.01	0.01	0.01	0.01
chromosome_1:8004979-8005112	N1	Cre01.g070567.v5.5	0.01	0.0503	0.01	0.01	0.01	0.01	0.01	0.01	0.01	0.01	0.01	0.01	0.01	0.01	0.01	0.01	0.01	0.01	0.01	0.01	0.01	0.01	0.01	0.01	0.01	0.01	0.01	0.01
chromosome_1:8005222-8005474	N5	Cre01.g070567.v5.5	0.1068	0.1136	0.0918	0.01	0.01	0.01	0.1413	0.01	0.01	0.01	0.139	0.01	0.0991	0.01	0.0756	0.0649	0.0896	0.1348	0.1121	0.1339	0.1454	0.1578	0.1521	0.1773	0.135	0.0792	0.1601	0.1805
chromosome_1:8021278-8021605	N1	Cre01.g071662.v5.5	0.01	0.01	0.01	0.01	0.01	0.01	0.01	0.01	0.01	0.01	0.01	0.01	0.01	0.01	0.0688	0.0476	0.01	0.01	0.044	0.0582	0.01	0.0418	0.0406	0.0536	0.01	0.01	0.01	0.01
chromosome_10:103944-104101	N1	Cre10.g418400.v5.5	0.0245	0.01	0.01	0.01	0.01	0.01	0.01	0.01	0.01	0.01	0.01	0.01	0.01	0.01	0.01	0.01	0.0347	0.01	0.11	0.1429	0.01	0.0656	0.01	0.0803	0.01	0.01	0.0511	0.0605
chromosome_10:105364-105522	N5	Cre10.g418400.v5.5	0.1064	0.01	0.01	0.01	0.01	0.01	0.01	0.01	0.01	0.01	0.0699	0.01	0.0469	0.01	0.0931	0.0914	0.0799	0.01	0.1455	0.1685	0.089	0.0731	0.1308	0.1855	0.0623	0.0762	0.1085	0.1836
chromosome_10:1114746-1114933	N1	Cre10.g425550.v5.5	0.01	0.01	0.01	0.01	0.01	0.1266	0.01	0.01	0.01	0.01	0.01	0.01	0.01	0.01	0.01	0.2778	0.01	0.01	0.01	0.01	0.01	0.01	0.01	0.01	0.01	0.01	0.2558	0.01
chromosome_10:112185-112584	N5	Cre10.g418500.v5.5	0.01	0.01	0.01	0.01	0.01	0.01	0.01	0.01	0.01	0.01	0.01	0.01	0.01	0.01	0.01	0.01	0.01	0.01	0.01	0.01	0.01	0.01	0.01	0.01	0.01	0.01	0.5061	0.01
chromosome_10:1235672-1235740	N3	Cre10.g426632.v5.5	0.01	0.01	0.01	0.01	0.01	0.01	0.01	0.3415	0.01	0.4615	0.5745	0.5714	0.5909	0.5333	0.5222	0.5072	0.3897	0.3774	0.3869	0.358	0.3488	0.287	0.2771	0.3291	0.3554	0.4032	0.3239	0.381
chromosome_10:1247438-1247798	N1	Cre10.g426750.v5.5	0.01	0.01	0.01	0.1422	0.1	0.0973	0.1067	0.1096	0.0817	0.0478	0.0427	0.0744	0.0521	0.0668	0.0477	0.0355	0.01	0.01	0.01	0.01	0.01	0.01	0.01	0.01	0.01	0.01	0.01	0.01
chromosome_10:1247811-1248146	N1	Cre10.g426750.v5.5	0.01	0.01	0.1111	0.1489	0.1172	0.0923	0.1082	0.1276	0.0769	0.0557	0.038	0.0619	0.051	0.01	0.0411	0.049	0.0352	0.01	0.0397	0.01	0.01	0.01	0.01	0.01	0.01	0.01	0.01	0.01
chromosome_10:1249112-1250333	N1	Cre10.g426750.v5.5	0.01	0.01	0.01	0.01	0.01	0.01	0.131	0.01	0.01	0.0742	0.1162	0.01	0.01	0.1786	0.1104	0.1257	0.2074	0.01	0.01	0.01	0.01	0.25	0.01	0.01	0.01	0.01	0.01	0.01
chromosome_10:1277278-1277592	N1	Cre10.g427050.v5.5	0.01	0.01	0.01	0.01	0.01	0.01	0.01	0.01	0.01	0.01	0.01	0.01	0.01	0.01	0.01	0.01	0.0447	0.01	0.01	0.0893	0.01	0.01	0.01	0.01	0.01	0.01	0.0887	0.01
chromosome_10:1296607-1296690	N2	Cre10.g427400.v5.5	0.1057	0.01	0.01	0.1823	0.2632	0.1692	0.219	0.2114	0.3061	0.01	0.3333	0.4348	0.01	0.01	0.186	0.01	0.1321	0.01	0.01	0.01	0.01	0.1628	0.1349	0.1091	0.1102	0.0759	0.0607	0.01
chromosome_10:1417272-1417424	N5	Cre10.g428200.v5.5	0.01	0.01	0.01	0.01	0.01	0.0125	0.0167	0.0305	0.0263	0.0179	0.01	0.0087	0.01	0.0161	0.01	0.01	0.0449	0.0615	0.0824	0.0812	0.0818	0.1173	0.1375	0.1838	0.01	0.01	0.01	0.0601
chromosome_10:1417614-1417816	N1	Cre10.g428200.v5.5	0.01	0.01	0.01	0.01	0.01	0.01	0.014	0.0078	0.0103	0.0123	0.01	0.0033	0.01	0.01	0.01	0.0146	0.01	0.01	0.01	0.0249	0.01	0.01	0.0577	0.01	0.01	0.01	0.0321	0.035
chromosome_10:1418812-1419057	N1	Cre10.g428200.v5.5	0.0361	0.01	0.01	0.0492	0.01	0.0747	0.0527	0.0801	0.067	0.01	0.0331	0.01	0.0176	0.01	0.0383	0.0524	0.0471	0.01	0.01	0.01	0.01	0.241	0.01	0.01	0.01	0.01	0.01	0.1471
chromosome_10:1562318-1562692	N1	Cre10.g429150.v5.5	0.01	0.01	0.01	0.01	0.01	0.01	0.01	0.01	0.01	0.01	0.01	0.01	0.01	0.01	0.01	0.01	0.01	0.01	0.01	0.01	0.01	0.01	0.01	0.01	0.01	0.01	0.0838	0.01
chromosome_10:1567901-1568105	N1	Cre10.g429200.v5.5	0.01	0.01	0.01	0.01	0.01	0.1642	0.01	0.01	0.01	0.01	0.01	0.01	0.01	0.01	0.01	0.01	0.01	0.01	0.01	0.01	0.01	0.01	0.01	0.01	0.01	0.01	0.01	0.01
chromosome_10:1608532-1608599	N1	Cre10.g429550.v5.5	0.01	0.01	0.01	0.01	0.01	0.01	0.01	0.01	0.01	0.01	0.01	0.01	0.01	0.01	0.01	0.01	0.01	0.01	0.01	0.01	0.01	0.01	0.01	0.01	0.01	0.01	0.0503	0.01
chromosome_10:1664102-1664802	N1	Cre10.g429850.v5.5	0.01	0.01	0.01	0.01	0.01	0.01	0.01	0.01	0.01	0.01	0.01	0.01	0.01	0.01	0.01	0.01	0.01	0.01	0.01	0.0719	0.01	0.01	0.01	0.01	0.01	0.01	0.0537	0.01
chromosome_10:18866-19101	N1	Cre10.g417550.v5.5	0.01	0.01	0.01	0.01	0.01	0.01	0.01	0.01	0.0546	0.01	0.01	0.01	0.01	0.01	0.01	0.01	0.01	0.01	0.01	0.01	0.01	0.0418	0.01	0.0323	0.0476	0.01	0.0276	0.01
chromosome_10:19130-19252	N1	Cre10.g417550.v5.5	0.01	0.01	0.01	0.01	0.01	0.01	0.0679	0.01	0.01	0.01	0.01	0.01	0.01	0.01	0.01	0.01	0.01	0.01	0.01	0.01	0.01	0.01	0.0455	0.0324	0.01	0.01	0.01	0.01
chromosome_10:19324-19450	N5	Cre10.g417550.v5.5	0.01	0.01	0.01	0.01	0.01	0.01	0.01	0.0839	0.01	0.01	0.01	0.01	0.0536	0.0676	0.0368	0.1243	0.1086	0.2	0.0802	0.0755	0.1508	0.2099	0.1677	0.1797	0.101	0.01	0.1	0.1681
chromosome_10:19483-19718	N5	Cre10.g417550.v5.5	0.01	0.01	0.01	0.01	0.01	0.01	0.01	0.01	0.01	0.01	0.01	0.01	0.01	0.01	0.0289	0.01	0.0712	0.01	0.01	0.01	0.1849	0.1839	0.1263	0.1552	0.0658	0.0694	0.0708	0.1351
chromosome_10:1985630-1985777	N5	Cre10.g432450.v5.5	0.01	0.01	0.01	0.01	0.01	0.01	0.01	0.01	0.01	0.01	0.01	0.01	0.01	0.01	0.01	0.01	0.0515	0.1864	0.01	0.01	0.122	0.0858	0.1025	0.0941	0.0565	0.0635	0.0955	0.0726
chromosome_10:2001494-2001802	N6	Cre10.g432550.v5.5	0.01	0.01	0.01	0.01	0.01	0.01	0.01	0.01	0.01	0.01	0.01	0.01	0.01	0.01	0.01	0.1695	0.1043	0.1594	0.087	0.01	0.2385	0.2154	0.156	0.2429	0.1701	0.1631	0.2333	0.1534
chromosome_10:2020199-2020330	N5	Cre10.g432650.v5.5	0.01	0.01	0.01	0.01	0.01	0.01	0.01	0.01	0.01	0.01	0.01	0.01	0.01	0.01	0.01	0.043	0.0388	0.01	0.092	0.01	0.01	0.2658	0.01	0.01	0.01	0.01	0.2857	0.01
chromosome_10:2050415-2050797	N1	Cre10.g433000.v5.5	0.0513	0.01	0.01	0.01	0.01	0.01	0.01	0.01	0.01	0.01	0.01	0.01	0.01	0.01	0.01	0.01	0.01	0.01	0.01	0.01	0.01	0.01	0.01	0.01	0.01	0.01	0.01	0.01
chromosome_10:2190655-2191350	N7	Cre10.g433750.v5.5	0.2384	0.01	0.01	0.2444	0.01	0.1818	0.01	0.2	0.01	0.2529	0.01	0.01	0.2	0.01	0.1786	0.2065	0.2222	0.01	0.0972	0.3265	0.4844	0.4559	0.4559	0.4857	0.451	0.3523	0.5143	0.525
chromosome_10:2485414-2485543	N1	Cre10.g436150.v5.5	0.01	0.01	0.01	0.01	0.01	0.01	0.01	0.01	0.01	0.01	0.01	0.01	0.01	0.01	0.01	0.01	0.01	0.01	0.01	0.01	0.01	0.01	0.01	0.0573	0.01	0.01	0.01	0.01
chromosome_10:2638569-2639019	N1	Cre10.g437450.v5.5	0.01	0.01	0.01	0.01	0.01	0.1368	0.01	0.01	0.01	0.01	0.01	0.01	0.01	0.01	0.01	0.01	0.01	0.01	0.01	0.01	0.01	0.01	0.01	0.01	0.01	0.01	0.01	0.01
chromosome_10:265549-265900	N5	Cre10.g419550.v5.5	0.01	0.01	0.01	0.01	0.01	0.01	0.01	0.01	0.01	0.01	0.01	0.01	0.01	0.01	0.01	0.01	0.01	0.01	0.01	0.01	0.01	0.01	0.01	0.2	0.01	0.2209	0.122	0.01
chromosome_10:2679239-2679516	N1	Cre10.g437850.v5.5	0.01	0.01	0.01	0.01	0.01	0.01	0.01	0.01	0.01	0.01	0.01	0.01	0.01	0.01	0.0364	0.01	0.0408	0.01	0.0792	0.01	0.1215	0.01	0.01	0.01	0.01	0.01	0.0653	0.01
chromosome_10:2745716-2745987	N1	Cre10.g438500.v5.5	0.01	0.01	0.01	0.01	0.01	0.01	0.01	0.01	0.01	0.01	0.01	0.01	0.01	0.01	0.01	0.01	0.01	0.01	0.01	0.01	0.01	0.01	0.1261	0.01	0.01	0.01	0.0948	0.1026
chromosome_10:28687-29117	N1	Cre10.g417650.v5.5	0.01	0.01	0.01	0.01	0.01	0.01	0.01	0.01	0.01	0.01	0.01	0.01	0.01	0.01	0.01	0.01	0.01	0.01	0.01	0.01	0.01	0.01	0.01	0.0475	0.01	0.01	0.0676	0.01
chromosome_10:2930753-2930822	N1	Cre10.g440350.v5.5	0.01	0.01	0.01	0.01	0.01	0.01	0.01	0.01	0.01	0.01	0.01	0.01	0.01	0.01	0.01	0.01	0.01	0.01	0.01	0.01	0.01	0.01	0.01	0.01	0.01	0.01	0.0514	0.01
chromosome_10:30019-30284	N1	Cre10.g417650.v5.5	0.037	0.01	0.01	0.01	0.01	0.066	0.01	0.01	0.01	0.01	0.01	0.01	0.01	0.01	0.0185	0.0157	0.01	0.01	0.01	0.01	0.01	0.01	0.01	0.01	0.01	0.01	0.01	0.01
chromosome_10:3043112-3043294	N1	Cre10.g441300.v5.5	0.01	0.01	0.01	0.01	0.01	0.01	0.01	0.01	0.01	0.01	0.01	0.01	0.01	0.01	0.01	0.01	0.01	0.01	0.01	0.125	0.01	0.01	0.01	0.0952	0.01	0.01	0.01	0.1683
chromosome_10:3056071-3056283	N1	Cre10.g441450.v5.5	0.01	0.01	0.01	0.01	0.01	0.01	0.01	0.01	0.01	0.01	0.01	0.01	0.01	0.01	0.01	0.01	0.01	0.01	0.01	0.01	0.01	0.01	0.0749	0.0528	0.01	0.01	0.0774	0.0815
chromosome_10:3074925-3075054	N1	Cre10.g441600.v5.5	0.01	0.01	0.01	0.01	0.01	0.01	0.01	0.01	0.01	0.01	0.01	0.01	0.01	0.01	0.01	0.01	0.01	0.01	0.01	0.01	0.01	0.01	0.01	0.01	0.01	0.01	0.1392	0.1096
chromosome_10:313499-313783	N1	Cre10.g420100.v5.5	0.0428	0.01	0.01	0.01	0.01	0.01	0.01	0.01	0.01	0.01	0.01	0.01	0.01	0.01	0.01	0.01	0.01	0.01	0.01	0.01	0.01	0.0827	0.1007	0.01	0.01	0.01	0.01	0.01
chromosome_10:3188094-3188208	N1	Cre10.g442450.v5.5	0.01	0.01	0.01	0.1125	0.01	0.01	0.01	0.01	0.01	0.01	0.01	0.01	0.01	0.01	0.01	0.01	0.01	0.01	0.01	0.01	0.01	0.01	0.01	0.01	0.01	0.01	0.01	0.01
chromosome_10:3207761-3207847	N4	Cre10.g442650.v5.5	0.6885	0.6055	0.5522	0.6337	0.7333	0.6124	0.6364	0.7182	0.4898	0.6281	0.5677	0.5115	0.5	0.435	0.444	0.5951	0.5998	0.6154	0.5937	0.7151	0.6195	0.6506	0.7216	0.7041	0.6518	0.5777	0.6526	0.783
chromosome_10:3229366-3229607	N5	Cre10.g442850.v5.5	0.01	0.01	0.01	0.01	0.01	0.01	0.01	0.01	0.01	0.01	0.01	0.01	0.01	0.01	0.01	0.01	0.2267	0.01	0.01	0.01	0.01	0.01	0.01	0.2906	0.01	0.2041	0.01	0.01
chromosome_10:3418678-3418815	N1	Cre10.g444500.v5.5	0.01	0.01	0.01	0.01	0.01	0.01	0.01	0.01	0.01	0.01	0.01	0.01	0.01	0.01	0.01	0.01	0.0202	0.01	0.01	0.01	0.0312	0.01	0.0469	0.0385	0.01	0.0465	0.0503	0.01
chromosome_10:3460605-3461022	N6	Cre10.g444800.v5.5	0.01	0.01	0.01	0.0767	0.01	0.1003	0.1213	0.0794	0.113	0.01	0.0329	0.01	0.0385	0.01	0.0442	0.0805	0.08	0.01	0.101	0.132	0.1278	0.2053	0.2207	0.3469	0.2067	0.1429	0.1988	0.284
chromosome_10:3499930-3500101	N1	Cre10.g445050.v5.5	0.01	0.01	0.0897	0.0709	0.01	0.0691	0.0912	0.093	0.0514	0.01	0.01	0.01	0.0697	0.01	0.0163	0.01	0.037	0.01	0.01	0.01	0.01	0.01	0.01	0.01	0.0433	0.01	0.01	0.01
chromosome_10:3695354-3695588	N1	Cre10.g446000.v5.5	0.01	0.01	0.01	0.01	0.01	0.01	0.1899	0.01	0.01	0.01	0.01	0.01	0.01	0.1171	0.01	0.1111	0.0498	0.01	0.01	0.01	0.01	0.01	0.01	0.01	0.01	0.01	0.01	0.01
chromosome_10:3695642-3695810	N1	Cre10.g446000.v5.5	0.01	0.01	0.01	0.01	0.01	0.01	0.01	0.01	0.01	0.01	0.01	0.01	0.01	0.01	0.0615	0.2093	0.01	0.01	0.01	0.01	0.01	0.01	0.01	0.01	0.01	0.01	0.01	0.01
chromosome_10:3699886-3700160	N2	Cre10.g446100.v5.5	0.2932	0.3733	0.2941	0.2074	0.243	0.14	0.2464	0.2435	0.01	0.01	0.01	0.01	0.0303	0.0493	0.0544	0.0736	0.1279	0.1354	0.1168	0.1485	0.1593	0.1266	0.1606	0.1894	0.2217	0.1946	0.1831	0.1312
chromosome_10:3700217-3700340	N1	Cre10.g446100.v5.5	0.01	0.01	0.0621	0.01	0.01	0.01	0.01	0.01	0.01	0.01	0.01	0.01	0.01	0.01	0.0132	0.01	0.01	0.01	0.01	0.0397	0.01	0.01	0.01	0.0584	0.057	0.0449	0.0567	0.01
chromosome_10:3784659-3784871	N1	Cre10.g446850.v5.5	0.01	0.01	0.01	0.01	0.01	0.01	0.01	0.01	0.01	0.01	0.01	0.01	0.01	0.01	0.01	0.01	0.0924	0.01	0.01	0.01	0.01	0.01	0.01	0.01	0.01	0.1038	0.0943	0.01
chromosome_10:3824551-3824632	N1	Cre10.g447200.v5.5	0.01	0.01	0.01	0.01	0.01	0.01	0.01	0.01	0.01	0.01	0.01	0.01	0.01	0.01	0.01	0.01	0.01	0.01	0.01	0.01	0.01	0.2099	0.01	0.01	0.1209	0.01	0.01	0.01
chromosome_10:3875309-3875523	N1	Cre10.g447700.v5.5	0.01	0.01	0.01	0.01	0.01	0.01	0.01	0.01	0.01	0.01	0.01	0.01	0.01	0.01	0.01	0.01	0.01	0.01	0.01	0.01	0.01	0.01	0.01	0.1211	0.0939	0.0897	0.0777	0.0636
chromosome_10:4075346-4075522	N5	Cre10.g449550.v5.5	0.01	0.01	0.01	0.01	0.01	0.0515	0.0389	0.0547	0.01	0.0248	0.015	0.01	0.0203	0.0258	0.0183	0.0281	0.053	0.0727	0.0582	0.0665	0.1015	0.1565	0.125	0.1365	0.1148	0.01	0.1165	0.1648
chromosome_10:437101-437257	N1	Cre10.g420750.v5.5	0.0291	0.0162	0.0134	0.0078	0.0094	0.0096	0.0085	0.0069	0.0041	0.0108	0.0072	0.0063	0.0081	0.003	0.0045	0.0075	0.0077	0.0066	0.0108	0.0088	0.0116	0.0165	0.0153	0.0148	0.0245	0.0279	0.0334	0.0633
chromosome_10:4507112-4507479	N1	Cre10.g452000.v5.5	0.01	0.01	0.01	0.01	0.01	0.01	0.01	0.01	0.01	0.01	0.01	0.01	0.01	0.01	0.01	0.01	0.01	0.01	0.01	0.01	0.0424	0.0561	0.0335	0.0549	0.034	0.0468	0.01	0.0426
chromosome_10:4527773-4528068	N6	Cre10.g452200.v5.5	0.2184	0.01	0.1351	0.01	0.3111	0.193	0.01	0.163	0.01	0.1389	0.0866	0.01	0.1228	0.01	0.1159	0.2439	0.1364	0.2292	0.3981	0.2333	0.2985	0.2692	0.2353	0.3038	0.4316	0.2677	0.3643	0.4301
chromosome_10:4630977-4631267	N6	Cre10.g452950.v5.5	0.01	0.01	0.01	0.01	0.01	0.01	0.01	0.2097	0.01	0.01	0.1546	0.01	0.01	0.1235	0.1667	0.2093	0.2482	0.3256	0.3804	0.01	0.4487	0.4105	0.314	0.35	0.3774	0.3279	0.3403	0.25
chromosome_10:4638590-4638839	N1	Cre10.g453050.v5.5	0.0772	0.01	0.01	0.1131	0.01	0.1024	0.0788	0.0547	0.01	0.01	0.01	0.01	0.0738	0.01	0.01	0.01	0.01	0.01	0.01	0.01	0.01	0.01	0.01	0.01	0.01	0.01	0.01	0.01
chromosome_10:4638974-4639126	N1	Cre10.g453050.v5.5	0.01	0.01	0.01	0.01	0.01	0.087	0.01	0.01	0.01	0.0923	0.01	0.01	0.01	0.01	0.01	0.01	0.01	0.01	0.01	0.01	0.01	0.01	0.01	0.01	0.01	0.01	0.01	0.01
chromosome_10:4639208-4639301	N1	Cre10.g453050.v5.5	0.0305	0.01	0.01	0.0608	0.01	0.01	0.01	0.0833	0.01	0.01	0.01	0.01	0.01	0.01	0.01	0.01	0.01	0.01	0.01	0.01	0.01	0.01	0.01	0.01	0.01	0.01	0.01	0.01
chromosome_10:4731467-4731611	N1	Cre10.g453700.v5.5	0.01	0.01	0.01	0.01	0.01	0.01	0.01	0.1074	0.01	0.01	0.01	0.01	0.01	0.01	0.01	0.01	0.01	0.01	0.01	0.01	0.01	0.01	0.01	0.01	0.01	0.01	0.01	0.01
chromosome_10:4838853-4839296	N1	Cre10.g454150.v5.5	0.01	0.01	0.01	0.01	0.01	0.01	0.01	0.01	0.01	0.01	0.01	0.01	0.01	0.01	0.01	0.01	0.01	0.01	0.01	0.01	0.01	0.01	0.01	0.01	0.0327	0.0598	0.01	0.01
chromosome_10:4902911-4903502	N1	Cre10.g454734.v5.5	0.01	0.01	0.01	0.0526	0.01	0.01	0.01	0.01	0.01	0.01	0.01	0.01	0.01	0.01	0.01	0.01	0.01	0.01	0.01	0.01	0.01	0.01	0.01	0.01	0.01	0.01	0.01	0.01
chromosome_10:492529-492623	N5	Cre10.g421079.v5.5	0.0995	0.01	0.01	0.01	0.01	0.01	0.01	0.01	0.25	0.01	0.01	0.01	0.01	0.01	0.01	0.1389	0.1379	0.2222	0.1525	0.01	0.1287	0.1724	0.01	0.2564	0.2805	0.01	0.1926	0.2237
chromosome_10:4930775-4930942	N1	Cre10.g454900.v5.5	0.0581	0.01	0.01	0.01	0.01	0.01	0.01	0.01	0.01	0.01	0.01	0.01	0.01	0.01	0.01	0.01	0.01	0.01	0.01	0.01	0.01	0.01	0.01	0.0408	0.01	0.01	0.01	0.01
chromosome_10:4939741-4939901	N5	Cre10.g455000.v5.5	0.01	0.01	0.01	0.01	0.01	0.0517	0.01	0.0264	0.0256	0.032	0.0292	0.01	0.014	0.01	0.0468	0.0355	0.0305	0.01	0.01	0.0688	0.01	0.0734	0.1	0.0888	0.01	0.0514	0.09	0.1053
chromosome_10:5087541-5087625	N8	Cre10.g456000.v5.5	0.01	0.01	0.01	0.01	0.4	0.4359	0.3297	0.2867	0.2785	0.2	0.2527	0.2249	0.2554	0.3667	0.4067	0.4947	0.4785	0.4971	0.4707	0.4763	0.5485	0.5429	0.5242	0.5104	0.4558	0.491	0.6386	0.597
chromosome_10:5109358-5109874	N1	Cre10.g456250.v5.5	0.1085	0.01	0.0848	0.01	0.01	0.0756	0.01	0.0539	0.01	0.01	0.0352	0.01	0.0385	0.01	0.0095	0.01	0.0101	0.01	0.0185	0.0236	0.0218	0.0429	0.0296	0.01	0.01	0.01	0.048	0.0557
chromosome_10:5328844-5329164	N5	Cre10.g457850.v5.5	0.01	0.01	0.01	0.01	0.01	0.01	0.01	0.01	0.01	0.01	0.01	0.01	0.01	0.01	0.0423	0.0422	0.0585	0.01	0.066	0.01	0.092	0.1463	0.09	0.1026	0.0737	0.0606	0.0847	0.01
chromosome_10:5348626-5348904	N1	Cre10.g458050.v5.5	0.01	0.01	0.01	0.01	0.01	0.01	0.01	0.01	0.01	0.01	0.01	0.01	0.01	0.01	0.01	0.01	0.01	0.01	0.01	0.01	0.01	0.01	0.01	0.1563	0.01	0.01	0.01	0.01
chromosome_10:5436989-5437164	N5	Cre10.g458450.v5.5	0.01	0.01	0.01	0.01	0.01	0.01	0.01	0.01	0.01	0.01	0.01	0.01	0.01	0.01	0.0619	0.01	0.1703	0.0841	0.01	0.01	0.0833	0.01	0.1789	0.1451	0.2077	0.1226	0.2636	0.01
chromosome_10:5437213-5437369	N1	Cre10.g458450.v5.5	0.01	0.01	0.01	0.01	0.01	0.01	0.01	0.01	0.01	0.01	0.01	0.01	0.01	0.01	0.01	0.01	0.062	0.01	0.01	0.01	0.01	0.0655	0.01	0.0905	0.1037	0.0422	0.1197	0.01
chromosome_10:5437505-5437793	N5	Cre10.g458450.v5.5	0.01	0.01	0.01	0.01	0.01	0.01	0.01	0.01	0.01	0.01	0.01	0.01	0.01	0.01	0.01	0.01	0.1134	0.01	0.01	0.01	0.01	0.01	0.01	0.01	0.1786	0.0975	0.2147	0.01
chromosome_10:5582565-5583147	N1	Cre10.g459800.v5.5	0.01	0.01	0.01	0.01	0.01	0.01	0.01	0.01	0.01	0.01	0.01	0.01	0.01	0.01	0.01	0.01	0.01	0.01	0.01	0.01	0.01	0.01	0.01	0.01	0.01	0.2857	0.01	0.01
chromosome_10:5595537-5595731	N1	Cre10.g459950.v5.5	0.01	0.01	0.01	0.01	0.01	0.01	0.01	0.01	0.01	0.01	0.01	0.01	0.01	0.01	0.01	0.01	0.01	0.01	0.01	0.01	0.01	0.0992	0.01	0.01	0.01	0.01	0.01	0.053
chromosome_10:5943833-5944424	N5	Cre10.g462250.v5.5	0.01	0.01	0.01	0.01	0.01	0.0316	0.0293	0.0292	0.0321	0.01	0.018	0.0242	0.0193	0.021	0.0113	0.0318	0.0439	0.01	0.0413	0.0848	0.0784	0.0827	0.1071	0.1441	0.1384	0.01	0.1754	0.1717
chromosome_10:5961636-5961798	N1	Cre10.g462350.v5.5	0.01	0.01	0.01	0.01	0.01	0.01	0.01	0.01	0.01	0.01	0.01	0.01	0.01	0.01	0.01	0.01	0.01	0.01	0.01	0.01	0.069	0.01	0.01	0.01	0.01	0.01	0.0427	0.0981
chromosome_10:6234994-6235132	N5	Cre10.g464600.v5.5	0.01	0.01	0.0398	0.01	0.01	0.0445	0.0405	0.058	0.0708	0.0985	0.0953	0.01	0.0865	0.116	0.1088	0.1316	0.1417	0.1533	0.108	0.1448	0.117	0.1128	0.0997	0.1301	0.0693	0.0865	0.1259	0.153
chromosome_10:6235868-6236116	N1	Cre10.g464650.v5.5	0.01	0.01	0.01	0.01	0.01	0.01	0.01	0.01	0.01	0.01	0.01	0.01	0.01	0.01	0.01	0.01	0.0259	0.01	0.0317	0.0413	0.0608	0.0705	0.0697	0.047	0.01	0.01	0.0395	0.01
chromosome_10:6548626-6548767	N1	Cre10.g467150.v5.5	0.01	0.01	0.01	0.01	0.01	0.01	0.01	0.01	0.01	0.01	0.01	0.01	0.01	0.01	0.014	0.01	0.0253	0.01	0.01	0.0502	0.0487	0.01	0.0492	0.043	0.0563	0.01	0.01	0.01
chromosome_11:1138077-1138367	N1	Cre11.g467682.v5.5	0.01	0.01	0.01	0.01	0.01	0.01	0.01	0.01	0.01	0.01	0.01	0.01	0.01	0.01	0.01	0.01	0.01	0.01	0.01	0.01	0.01	0.01	0.01	0.01	0.01	0.1092	0.01	0.01
chromosome_11:1138428-1138879	N1	Cre11.g467682.v5.5	0.01	0.01	0.01	0.01	0.01	0.01	0.01	0.01	0.01	0.01	0.01	0.01	0.01	0.01	0.01	0.01	0.01	0.01	0.01	0.01	0.01	0.01	0.01	0.01	0.076	0.0793	0.01	0.01
chromosome_11:1154034-1154187	N1	Cre11.g467685.v5.5	0.01	0.01	0.01	0.01	0.01	0.01	0.01	0.01	0.01	0.01	0.01	0.01	0.01	0.01	0.0356	0.01	0.0485	0.0909	0.0631	0.01	0.01	0.064	0.01	0.0938	0.0853	0.052	0.0658	0.0742
chromosome_11:140176-140335	N1	Cre11.g467541.v5.5	0.01	0.01	0.01	0.01	0.01	0.01	0.01	0.01	0.01	0.01	0.01	0.01	0.01	0.01	0.01	0.01	0.01	0.01	0.01	0.01	0.01	0.0854	0.01	0.117	0.01	0.01	0.01	0.01
chromosome_11:2062734-2063040	N5	Cre11.g468700.v5.5	0.01	0.01	0.01	0.01	0.01	0.01	0.01	0.01	0.01	0.01	0.01	0.01	0.01	0.01	0.01	0.01	0.01	0.01	0.01	0.1167	0.0972	0.01	0.01	0.1383	0.1633	0.124	0.0632	0.2738
chromosome_11:2398899-2399086	N1	Cre11.g474850.v5.5	0.01	0.01	0.01	0.01	0.01	0.01	0.01	0.01	0.01	0.01	0.01	0.01	0.01	0.01	0.01	0.01	0.01	0.01	0.01	0.01	0.01	0.01	0.01	0.0502	0.01	0.01	0.0365	0.01
chromosome_11:2419469-2419970	N1	Cre11.g475050.v5.5	0.01	0.01	0.01	0.01	0.01	0.01	0.01	0.01	0.01	0.01	0.01	0.01	0.01	0.01	0.01	0.01	0.01	0.01	0.01	0.01	0.01	0.01	0.01	0.01	0.2143	0.01	0.01	0.01
chromosome_11:2649478-2649818	N1	Cre11.g476550.v5.5	0.01	0.01	0.01	0.01	0.01	0.01	0.01	0.01	0.01	0.01	0.01	0.01	0.01	0.01	0.01	0.01	0.01	0.01	0.01	0.01	0.01	0.01	0.01	0.01	0.1195	0.0863	0.0463	0.01
chromosome_11:2649929-2650325	N1	Cre11.g476550.v5.5	0.01	0.01	0.01	0.01	0.01	0.01	0.01	0.01	0.01	0.01	0.01	0.01	0.01	0.01	0.01	0.01	0.01	0.01	0.01	0.01	0.01	0.01	0.01	0.01	0.0637	0.0624	0.01	0.01
chromosome_11:2930398-2930686	N1	Cre11.g478050.v5.5	0.01	0.01	0.01	0.01	0.01	0.01	0.01	0.2105	0.01	0.01	0.01	0.01	0.01	0.01	0.01	0.01	0.01	0.01	0.01	0.01	0.01	0.01	0.01	0.01	0.01	0.01	0.01	0.01
chromosome_11:3101670-3101811	N1	Cre11.g479000.v5.5	0.01	0.01	0.01	0.01	0.01	0.01	0.01	0.01	0.01	0.01	0.01	0.01	0.01	0.01	0.01	0.01	0.01	0.01	0.01	0.01	0.01	0.01	0.01	0.0792	0.055	0.01	0.0417	0.01
chromosome_11:3225701-3225938	N1	Cre11.g479600.v5.5	0.0719	0.01	0.01	0.01	0.01	0.01	0.01	0.01	0.01	0.01	0.01	0.01	0.01	0.01	0.01	0.01	0.01	0.01	0.01	0.01	0.01	0.01	0.0302	0.01	0.01	0.01	0.0358	0.0335
chromosome_11:3226194-3226517	N1	Cre11.g479600.v5.5	0.01	0.01	0.0604	0.01	0.01	0.01	0.01	0.01	0.01	0.01	0.01	0.01	0.01	0.01	0.01	0.01	0.01	0.01	0.01	0.01	0.0458	0.0526	0.0611	0.0767	0.0244	0.01	0.0385	0.0597
chromosome_11:3230358-3230842	N1	Cre11.g479600.v5.5	0.01	0.01	0.01	0.01	0.01	0.01	0.01	0.01	0.01	0.01	0.01	0.01	0.01	0.01	0.01	0.01	0.01	0.01	0.01	0.01	0.01	0.01	0.01	0.1545	0.0789	0.01	0.0992	0.01
chromosome_11:3230863-3231140	N1	Cre11.g479600.v5.5	0.01	0.01	0.01	0.01	0.01	0.01	0.01	0.01	0.01	0.01	0.01	0.01	0.01	0.01	0.01	0.01	0.01	0.01	0.01	0.01	0.01	0.01	0.01	0.01	0.01	0.01	0.0532	0.01
chromosome_11:3438727-3439039	N1	Cre11.g481000.v5.5	0.01	0.01	0.0391	0.01	0.01	0.01	0.01	0.01	0.01	0.01	0.01	0.01	0.01	0.01	0.01	0.01	0.0313	0.01	0.0334	0.0435	0.0485	0.01	0.0674	0.0569	0.0751	0.046	0.0736	0.0868
chromosome_11:3459662-3460716	N1	Cre11.g481115.v5.5	0.01	0.01	0.01	0.01	0.01	0.01	0.01	0.01	0.01	0.01	0.01	0.01	0.01	0.01	0.01	0.01	0.01	0.01	0.01	0.01	0.01	0.01	0.01	0.01	0.01	0.01	0.117	0.01
chromosome_11:3580646-3580772	N1	Cre11.g481800.v5.5	0.01	0.01	0.01	0.01	0.01	0.01	0.01	0.01	0.01	0.01	0.01	0.01	0.01	0.01	0.01	0.01	0.094	0.01	0.01	0.01	0.01	0.01	0.01	0.01	0.01	0.01	0.01	0.01
chromosome_11:558785-558928	N1	Cre11.g467607.v5.5	0.0949	0.01	0.01	0.01	0.01	0.163	0.2188	0.2078	0.01	0.01	0.0968	0.01	0.0957	0.01	0.1399	0.01	0.01	0.01	0.01	0.01	0.01	0.01	0.01	0.01	0.01	0.01	0.01	0.01
chromosome_11:775875-775969	N1	Cre11.g467635.v5.5	0.01	0.01	0.01	0.01	0.01	0.01	0.01	0.01	0.01	0.01	0.01	0.01	0.01	0.01	0.01	0.01	0.01	0.01	0.01	0.01	0.01	0.01	0.01	0.01	0.01	0.01	0.0558	0.01
chromosome_11:830352-830618	N1	Cre11.g467647.v5.5	0.01	0.01	0.01	0.01	0.01	0.01	0.01	0.01	0.01	0.01	0.01	0.01	0.01	0.01	0.01	0.01	0.01	0.01	0.01	0.01	0.01	0.01	0.01	0.01	0.01	0.0714	0.01	0.01
chromosome_12:1006893-1007093	N1	Cre12.g491600.v5.5	0.01	0.01	0.01	0.01	0.01	0.01	0.01	0.01	0.01	0.01	0.01	0.01	0.01	0.01	0.01	0.01	0.01	0.01	0.01	0.01	0.01	0.01	0.01	0.0534	0.01	0.0369	0.0503	0.0516
chromosome_12:1007106-1007254	N1	Cre12.g491600.v5.5	0.01	0.01	0.01	0.01	0.01	0.01	0.01	0.01	0.01	0.01	0.01	0.01	0.01	0.01	0.01	0.01	0.01	0.2647	0.01	0.01	0.01	0.01	0.01	0.1029	0.01	0.0338	0.0726	0.0846
chromosome_12:1027352-1027972	N1	Cre12.g491250.v5.5	0.01	0.01	0.01	0.01	0.01	0.0892	0.01	0.01	0.01	0.01	0.01	0.01	0.01	0.01	0.01	0.01	0.01	0.01	0.01	0.01	0.01	0.01	0.01	0.01	0.01	0.01	0.01	0.01
chromosome_12:1028627-1028822	N1	Cre12.g491250.v5.5	0.01	0.01	0.01	0.01	0.01	0.01	0.01	0.01	0.01	0.01	0.01	0.01	0.01	0.01	0.01	0.01	0.01	0.01	0.01	0.01	0.01	0.01	0.01	0.01	0.01	0.01	0.0615	0.01
chromosome_12:105600-106103	N1	Cre12.g484150.v5.5	0.01	0.01	0.01	0.01	0.1786	0.1691	0.01	0.01	0.01	0.01	0.01	0.01	0.01	0.01	0.01	0.01	0.01	0.01	0.01	0.01	0.01	0.01	0.01	0.01	0.01	0.01	0.01	0.01
chromosome_12:1105499-1105685	N1	Cre12.g490600.v5.5	0.01	0.01	0.01	0.01	0.01	0.01	0.01	0.01	0.01	0.01	0.01	0.01	0.01	0.01	0.01	0.01	0.01	0.01	0.01	0.01	0.01	0.01	0.01	0.01	0.01	0.2576	0.01	0.01
chromosome_12:1305272-1305334	N1	Cre12.g489002.v5.5	0.01	0.01	0.01	0.01	0.01	0.01	0.01	0.01	0.01	0.01	0.01	0.01	0.01	0.01	0.01	0.01	0.01	0.01	0.01	0.01	0.01	0.01	0.01	0.1605	0.01	0.01	0.01	0.01
chromosome_12:1478807-1479370	N1	Cre12.g487600.v5.5	0.01	0.01	0.01	0.01	0.01	0.01	0.01	0.01	0.01	0.01	0.01	0.01	0.01	0.01	0.01	0.01	0.01	0.01	0.01	0.01	0.01	0.01	0.01	0.01	0.1081	0.01	0.01	0.01
chromosome_12:1512076-1512276	N1	Cre12.g487200.v5.5	0.0504	0.01	0.01	0.01	0.01	0.01	0.01	0.01	0.01	0.01	0.01	0.01	0.01	0.01	0.01	0.01	0.01	0.01	0.01	0.01	0.01	0.01	0.01	0.01	0.01	0.01	0.01	0.01
chromosome_12:1602982-1603376	N1	Cre12.g486400.v5.5	0.01	0.01	0.01	0.01	0.01	0.01	0.01	0.01	0.01	0.01	0.01	0.01	0.01	0.01	0.01	0.01	0.01	0.01	0.01	0.01	0.01	0.01	0.01	0.01	0.01	0.0796	0.01	0.01
chromosome_12:1629955-1630165	N1	Cre12.g486207.v5.5	0.01	0.01	0.01	0.01	0.01	0.01	0.01	0.01	0.01	0.01	0.01	0.01	0.01	0.01	0.01	0.01	0.01	0.01	0.075	0.098	0.01	0.01	0.01	0.1171	0.01	0.01	0.01	0.01
chromosome_12:1630922-1631305	N1	Cre12.g486207.v5.5	0.01	0.01	0.01	0.01	0.01	0.01	0.01	0.01	0.01	0.01	0.01	0.01	0.01	0.01	0.01	0.01	0.01	0.01	0.01	0.01	0.01	0.01	0.0882	0.01	0.01	0.01	0.01	0.1207
chromosome_12:1841414-1841526	N5	Cre12.g511850.v5.5	0.01	0.01	0.0498	0.01	0.0729	0.0481	0.0716	0.0741	0.0756	0.0793	0.0642	0.0576	0.0574	0.0523	0.0551	0.0663	0.0679	0.0623	0.0839	0.0756	0.1075	0.1082	0.0991	0.1024	0.1001	0.0919	0.1213	0.0936
chromosome_12:1843302-1843500	N5	Cre12.g511800.v5.5	0.01	0.01	0.01	0.01	0.01	0.01	0.01	0.01	0.01	0.01	0.01	0.01	0.01	0.01	0.01	0.01	0.0328	0.01	0.0447	0.0636	0.0816	0.0734	0.0758	0.0989	0.0564	0.0586	0.0648	0.0755
chromosome_12:2018928-2019130	N1	Cre12.g510100.v5.5	0.01	0.01	0.01	0.01	0.01	0.01	0.01	0.01	0.01	0.01	0.01	0.01	0.01	0.01	0.01	0.01	0.01	0.01	0.01	0.01	0.01	0.1395	0.01	0.1781	0.01	0.01	0.01	0.1579
chromosome_12:2062936-2063093	N1	Cre12.g509700.v5.5	0.01	0.01	0.01	0.01	0.01	0.01	0.01	0.01	0.01	0.0902	0.01	0.01	0.01	0.01	0.01	0.01	0.01	0.01	0.0558	0.01	0.01	0.01	0.01	0.01	0.01	0.01	0.01	0.0769
chromosome_12:2076438-2076522	N1	Cre12.g509550.v5.5	0.01	0.01	0.01	0.01	0.01	0.01	0.01	0.01	0.01	0.01	0.01	0.01	0.01	0.01	0.01	0.01	0.01	0.01	0.01	0.01	0.01	0.01	0.01	0.0612	0.01	0.01	0.0435	0.01
chromosome_12:2076579-2076678	N5	Cre12.g509550.v5.5	0.01	0.01	0.01	0.01	0.01	0.01	0.045	0.01	0.01	0.01	0.01	0.01	0.01	0.01	0.0461	0.065	0.0649	0.01	0.0656	0.0726	0.01	0.1	0.1571	0.112	0.1071	0.01	0.0782	0.0684
chromosome_12:2118565-2118860	N1	Cre12.g509050.v5.5	0.01	0.01	0.01	0.01	0.01	0.01	0.01	0.01	0.01	0.01	0.01	0.01	0.01	0.01	0.3453	0.01	0.01	0.01	0.01	0.01	0.01	0.01	0.01	0.01	0.01	0.01	0.01	0.01
chromosome_12:2136115-2136262	N1	Cre12.g508850.v5.5	0.0488	0.01	0.01	0.01	0.01	0.01	0.0255	0.01	0.01	0.01	0.01	0.01	0.01	0.01	0.01	0.01	0.01	0.01	0.01	0.01	0.01	0.01	0.01	0.01	0.129	0.01	0.01	0.01
chromosome_12:2368945-2369283	N1	Cre12.g507450.v5.5	0.01	0.01	0.01	0.01	0.01	0.01	0.01	0.01	0.01	0.01	0.01	0.01	0.01	0.01	0.01	0.01	0.01	0.01	0.01	0.01	0.01	0.01	0.01	0.01	0.01	0.0539	0.01	0.01
chromosome_12:2370880-2370950	N1	Cre12.g507450.v5.5	0.01	0.01	0.01	0.01	0.01	0.01	0.01	0.01	0.01	0.01	0.01	0.01	0.01	0.01	0.01	0.01	0.01	0.01	0.01	0.022	0.01	0.0355	0.01	0.0235	0.0347	0.0643	0.01	0.01
chromosome_12:2551635-2552125	N5	Cre12.g505650.v5.5	0.01	0.01	0.01	0.01	0.01	0.01	0.01	0.01	0.01	0.01	0.01	0.01	0.01	0.01	0.01	0.01	0.01	0.01	0.01	0.01	0.01	0.01	0.01	0.1196	0.1088	0.1203	0.0927	0.1081
chromosome_12:2666268-2666532	N1	Cre12.g504150.v5.5	0.01	0.01	0.01	0.01	0.01	0.01	0.0779	0.01	0.01	0.01	0.01	0.0334	0.01	0.01	0.0487	0.01	0.01	0.01	0.0493	0.01	0.01	0.01	0.01	0.01	0.01	0.01	0.01	0.0588
chromosome_12:2667222-2667416	N1	Cre12.g504150.v5.5	0.01	0.01	0.01	0.01	0.01	0.01	0.01	0.01	0.01	0.01	0.01	0.01	0.01	0.01	0.01	0.01	0.01	0.01	0.01	0.01	0.01	0.01	0.01	0.0613	0.01	0.01	0.01	0.0903
chromosome_12:2779477-2779680	N1	Cre12.g502950.v5.5	0.01	0.01	0.01	0.01	0.01	0.01	0.01	0.01	0.01	0.01	0.01	0.01	0.01	0.01	0.01	0.01	0.01	0.01	0.01	0.01	0.01	0.01	0.01	0.0987	0.01	0.01	0.01	0.01
chromosome_12:3115987-3116347	N1	Cre12.g499900.v5.5	0.01	0.01	0.01	0.01	0.01	0.01	0.01	0.01	0.01	0.01	0.01	0.01	0.01	0.01	0.0151	0.01	0.0174	0.0586	0.0503	0.0536	0.0251	0.01	0.0752	0.01	0.01	0.01	0.0314	0.01
chromosome_12:3149694-3150204	N6	Cre12.g499500.v5.5	0.0753	0.01	0.01	0.1042	0.1574	0.1164	0.19	0.1169	0.1224	0.1043	0.0757	0.01	0.0719	0.0653	0.0525	0.1004	0.104	0.01	0.0903	0.1202	0.1515	0.202	0.1893	0.2485	0.2059	0.2099	0.2312	0.2963
chromosome_12:3164792-3165028	N2	Cre12.g499350.v5.5	0.01	0.01	0.01	0.1138	0.1807	0.1212	0.1198	0.0684	0.0926	0.01	0.0634	0.01	0.01	0.0892	0.0617	0.0643	0.0413	0.041	0.0543	0.0494	0.0792	0.0512	0.01	0.0635	0.069	0.0891	0.0346	0.0809
chromosome_12:3182577-3182787	N2	Cre12.g499200.v5.5	0.01	0.01	0.2969	0.1925	0.01	0.1598	0.1852	0.1706	0.2033	0.01	0.1727	0.01	0.2598	0.233	0.2147	0.2288	0.1754	0.01	0.1824	0.2037	0.1517	0.1696	0.1699	0.2083	0.1538	0.0683	0.01	0.1681
chromosome_12:3188957-3189245	N1	Cre12.g499150.v5.5	0.01	0.01	0.01	0.01	0.01	0.0493	0.01	0.01	0.0616	0.01	0.01	0.01	0.01	0.01	0.01	0.01	0.01	0.01	0.01	0.01	0.01	0.01	0.01	0.01	0.01	0.01	0.01	0.01
chromosome_12:3191087-3191419	N1	Cre12.g499150.v5.5	0.01	0.01	0.131	0.1587	0.01	0.1369	0.129	0.1407	0.01	0.01	0.0969	0.01	0.01	0.01	0.01	0.01	0.01	0.01	0.01	0.01	0.01	0.01	0.01	0.01	0.01	0.01	0.01	0.01
chromosome_12:3257219-3257829	N4	Cre12.g498350.v5.5	0.2987	0.01	0.4653	0.4888	0.5213	0.5524	0.634	0.782	0.6	0.6768	0.4672	0.01	0.4627	0.6	0.5256	0.5786	0.684	0.7273	0.7534	0.8037	0.8395	0.92	0.875	0.842	0.8128	0.7822	0.8961	0.88
chromosome_12:3333881-3334070	N1	Cre12.g497652.v5.5	0.01	0.01	0.01	0.01	0.01	0.01	0.01	0.01	0.01	0.01	0.01	0.01	0.01	0.01	0.01	0.01	0.01	0.01	0.01	0.01	0.01	0.0671	0.01	0.01	0.01	0.01	0.0684	0.01
chromosome_12:3472017-3472103	N1	Cre12.g496200.v5.5	0.01	0.01	0.01	0.01	0.01	0.01	0.01	0.01	0.01	0.01	0.01	0.01	0.01	0.01	0.01	0.01	0.01	0.01	0.01	0.01	0.01	0.01	0.01	0.01	0.01	0.0776	0.1006	0.117
chromosome_12:3529124-3529239	N2	Cre12.g513254.v5.5	0.01	0.01	0.01	0.01	0.25	0.16	0.1129	0.0871	0.01	0.0769	0.0321	0.0864	0.0976	0.01	0.0581	0.01	0.0887	0.01	0.0649	0.1047	0.01	0.0629	0.068	0.01	0.0743	0.0933	0.0921	0.01
chromosome_12:3529332-3529447	N1	Cre12.g513254.v5.5	0.01	0.01	0.01	0.01	0.01	0.01	0.01	0.01	0.01	0.01	0.01	0.01	0.01	0.01	0.0556	0.01	0.01	0.01	0.01	0.01	0.01	0.01	0.01	0.01	0.01	0.01	0.01	0.01
chromosome_12:3574566-3574629	N1	Cre12.g513600.v5.5	0.01	0.01	0.01	0.01	0.01	0.01	0.01	0.01	0.01	0.01	0.1484	0.01	0.1465	0.01	0.01	0.01	0.01	0.01	0.01	0.01	0.01	0.01	0.01	0.01	0.01	0.01	0.01	0.01
chromosome_12:3609928-3610186	N1	Cre12.g513900.v5.5	0.01	0.01	0.01	0.01	0.01	0.01	0.01	0.0581	0.01	0.01	0.01	0.01	0.01	0.01	0.033	0.01	0.01	0.01	0.0428	0.01	0.1083	0.01	0.01	0.01	0.01	0.01	0.0619	0.01
chromosome_12:3612708-3612783	N1	Cre12.g513950.v5.5	0.01	0.01	0.01	0.01	0.01	0.01	0.01	0.01	0.01	0.01	0.01	0.01	0.01	0.01	0.01	0.01	0.01	0.01	0.01	0.01	0.01	0.01	0.01	0.0891	0.01	0.01	0.0389	0.01
chromosome_12:3632592-3632822	N3	Cre12.g514100.v5.5	0.3554	0.01	0.01	0.01	0.01	0.01	0.01	0.01	0.01	0.01	0.01	0.01	0.01	0.5652	0.5109	0.6176	0.4183	0.3864	0.3776	0.4394	0.3827	0.3214	0.3299	0.2758	0.2578	0.169	0.2405	0.2455
chromosome_12:3640248-3640415	N5	Cre12.g514200.v5.5	0.01	0.01	0.01	0.01	0.01	0.01	0.01	0.01	0.01	0.01	0.01	0.01	0.01	0.01	0.01	0.01	0.01	0.01	0.01	0.01	0.01	0.0702	0.0421	0.0622	0.1051	0.1121	0.2036	0.1232
chromosome_12:3640561-3640789	N5	Cre12.g514200.v5.5	0.01	0.01	0.01	0.01	0.01	0.01	0.01	0.01	0.01	0.01	0.01	0.01	0.01	0.01	0.01	0.01	0.01	0.01	0.01	0.01	0.0469	0.0851	0.01	0.0794	0.1654	0.1464	0.3153	0.1777
chromosome_12:3725973-3726087	N1	Cre12.g514800.v5.5	0.01	0.01	0.01	0.01	0.01	0.01	0.01	0.01	0.01	0.01	0.01	0.01	0.01	0.01	0.01	0.01	0.01	0.01	0.01	0.1212	0.01	0.01	0.01	0.1091	0.01	0.01	0.01	0.01
chromosome_12:380164-380445	N1	Cre12.g494100.v5.5	0.01	0.01	0.01	0.01	0.01	0.01	0.01	0.01	0.054	0.01	0.01	0.01	0.01	0.01	0.01	0.01	0.0444	0.01	0.0443	0.01	0.01	0.01	0.01	0.0765	0.0822	0.01	0.0608	0.0545
chromosome_12:3876297-3876700	N1	Cre12.g515650.v5.5	0.0494	0.01	0.01	0.01	0.01	0.01	0.0673	0.01	0.01	0.01	0.01	0.044	0.01	0.01	0.01	0.01	0.01	0.01	0.01	0.01	0.01	0.01	0.01	0.01	0.01	0.01	0.01	0.01
chromosome_12:3894796-3894956	N1	Cre12.g515850.v5.5	0.01	0.01	0.01	0.01	0.01	0.01	0.01	0.01	0.01	0.0474	0.0477	0.047	0.0411	0.0494	0.0435	0.0535	0.0359	0.0476	0.0428	0.0562	0.01	0.01	0.01	0.01	0.01	0.01	0.01	0.01
chromosome_12:3915030-3915386	N5	Cre12.g516000.v5.5	0.01	0.01	0.01	0.01	0.01	0.01	0.01	0.01	0.01	0.01	0.01	0.01	0.2857	0.01	0.1146	0.01	0.224	0.2308	0.1382	0.01	0.1395	0.1529	0.2381	0.1919	0.1914	0.01	0.01	0.2048
chromosome_12:3974027-3974153	N1	Cre12.g516650.v5.5	0.01	0.01	0.01	0.01	0.01	0.01	0.01	0.01	0.01	0.01	0.01	0.01	0.01	0.01	0.01	0.01	0.01	0.01	0.01	0.01	0.01	0.01	0.01	0.0558	0.01	0.01	0.01	0.01
chromosome_12:397997-398073	N5	Cre12.g494000.v5.5	0.01	0.01	0.01	0.01	0.01	0.01	0.01	0.01	0.01	0.01	0.01	0.01	0.01	0.01	0.01	0.01	0.01	0.01	0.01	0.2043	0.1628	0.01	0.01	0.1792	0.01	0.01	0.1803	0.2154
chromosome_12:4058125-4058286	N6	Cre12.g517550.v5.5	0.01	0.01	0.01	0.1944	0.01	0.129	0.1556	0.2151	0.01	0.01	0.0978	0.01	0.01	0.01	0.1379	0.01	0.1724	0.1754	0.2195	0.276	0.1759	0.2407	0.1368	0.2423	0.1527	0.1765	0.15	0.2436
chromosome_12:4130100-4130306	N5	Cre12.g518100.v5.5	0.01	0.01	0.01	0.01	0.01	0.01	0.01	0.01	0.01	0.01	0.01	0.01	0.01	0.01	0.01	0.01	0.01	0.01	0.2016	0.1308	0.2159	0.2097	0.2019	0.2935	0.1338	0.01	0.01	0.01
chromosome_12:413405-413626	N1	Cre12.g493903.v5.5	0.0643	0.01	0.01	0.01	0.01	0.01	0.01	0.01	0.01	0.01	0.01	0.01	0.01	0.01	0.01	0.0727	0.01	0.01	0.01	0.01	0.01	0.01	0.01	0.01	0.01	0.01	0.01	0.01
chromosome_12:414552-414627	N5	Cre12.g493903.v5.5	0.01	0.01	0.01	0.01	0.01	0.01	0.01	0.0923	0.01	0.01	0.01	0.01	0.01	0.01	0.01	0.01	0.01	0.01	0.01	0.1163	0.1739	0.1328	0.1393	0.0978	0.01	0.1327	0.0826	0.087
chromosome_12:4318979-4319071	N1	Cre12.g520000.v5.5	0.01	0.01	0.01	0.01	0.01	0.01	0.01	0.01	0.01	0.01	0.01	0.01	0.01	0.01	0.01	0.01	0.01	0.01	0.01	0.01	0.01	0.01	0.01	0.034	0.01	0.0419	0.0443	0.0796
chromosome_12:4403772-4404229	N6	Cre12.g520800.v5.5	0.01	0.01	0.01	0.01	0.01	0.01	0.01	0.01	0.01	0.01	0.2419	0.01	0.01	0.01	0.1392	0.1963	0.1371	0.1719	0.1462	0.2288	0.1754	0.1048	0.2596	0.1208	0.097	0.0744	0.1135	0.2022
chromosome_12:4407428-4407502	N1	Cre12.g520850.v5.5	0.01	0.01	0.01	0.01	0.01	0.01	0.01	0.01	0.01	0.01	0.01	0.01	0.01	0.01	0.0523	0.01	0.01	0.01	0.01	0.01	0.01	0.01	0.01	0.01	0.01	0.01	0.01	0.01
chromosome_12:4442189-4442568	N1	Cre12.g521300.v5.5	0.01	0.01	0.01	0.01	0.01	0.01	0.081	0.0566	0.01	0.01	0.01	0.01	0.01	0.01	0.01	0.01	0.01	0.01	0.01	0.01	0.01	0.01	0.01	0.01	0.01	0.0128	0.01	0.01
chromosome_12:4442681-4442859	N1	Cre12.g521300.v5.5	0.01	0.01	0.01	0.01	0.01	0.082	0.1087	0.0626	0.0936	0.01	0.01	0.1121	0.01	0.01	0.01	0.01	0.0046	0.01	0.01	0.01	0.01	0.01	0.01	0.01	0.0134	0.0167	0.01	0.01
chromosome_12:45472-45635	N1	Cre12.g483600.v5.5	0.01	0.01	0.01	0.01	0.01	0.01	0.01	0.01	0.01	0.01	0.01	0.01	0.01	0.01	0.01	0.01	0.01	0.01	0.01	0.01	0.01	0.01	0.01	0.0806	0.01	0.01	0.01	0.01
chromosome_12:4881409-4881475	N6	Cre12.g525200.v5.5	0.01	0.1593	0.1345	0.1031	0.1596	0.2158	0.1793	0.1123	0.2031	0.1648	0.1325	0.01	0.01	0.01	0.2556	0.1392	0.2692	0.01	0.2035	0.3299	0.3118	0.3625	0.2625	0.324	0.4058	0.3438	0.4098	0.2294
chromosome_12:5151544-5151856	N1	Cre12.g527150.v5.5	0.01	0.01	0.01	0.01	0.01	0.01	0.01	0.01	0.01	0.01	0.01	0.01	0.01	0.01	0.01	0.01	0.01	0.01	0.01	0.01	0.01	0.01	0.01	0.01	0.01	0.1007	0.01	0.01
chromosome_12:5164445-5164626	N1	Cre12.g527350.v5.5	0.01	0.01	0.01	0.01	0.01	0.01	0.01	0.01	0.01	0.01	0.01	0.01	0.01	0.01	0.01	0.01	0.01	0.01	0.01	0.01	0.01	0.01	0.01	0.01	0.1628	0.01	0.01	0.01
chromosome_12:5201976-5202185	N1	Cre12.g527850.v5.5	0.01	0.01	0.01	0.01	0.01	0.01	0.01	0.01	0.01	0.01	0.01	0.01	0.01	0.01	0.0474	0.0473	0.0759	0.01	0.0465	0.0682	0.0756	0.1449	0.113	0.01	0.1239	0.01	0.01	0.01
chromosome_12:5206684-5207750	N5	Cre12.g527918.v5.5	0.01	0.01	0.01	0.01	0.01	0.01	0.01	0.01	0.01	0.01	0.01	0.01	0.01	0.01	0.01	0.01	0.01	0.01	0.01	0.01	0.127	0.01	0.1304	0.0981	0.1032	0.0909	0.0599	0.1017
chromosome_12:5228731-5228910	N1	Cre12.g528150.v5.5	0.01	0.01	0.01	0.01	0.01	0.0773	0.01	0.01	0.01	0.01	0.01	0.0148	0.01	0.01	0.01	0.01	0.01	0.01	0.01	0.01	0.01	0.01	0.01	0.01	0.01	0.01	0.01	0.01
chromosome_12:5252909-5253078	N1	Cre12.g528300.v5.5	0.01	0.01	0.01	0.1301	0.01	0.194	0.01	0.01	0.01	0.01	0.01	0.01	0.01	0.01	0.01	0.01	0.01	0.01	0.01	0.01	0.01	0.01	0.01	0.01	0.01	0.01	0.01	0.01
chromosome_12:5266924-5267035	N5	Cre12.g528500.v5.5	0.01	0.01	0.01	0.01	0.01	0.01	0.01	0.01	0.01	0.0926	0.01	0.01	0.01	0.01	0.1461	0.124	0.1232	0.1692	0.01	0.1917	0.1765	0.2	0.01	0.01	0.01	0.01	0.1803	0.01
chromosome_12:5286825-5286963	N6	Cre12.g528800.v5.5	0.6163	0.6111	0.4359	0.2549	0.01	0.2877	0.01	0.01	0.01	0.01	0.1176	0.01	0.1122	0.0321	0.0276	0.0502	0.0773	0.1584	0.1083	0.1574	0.187	0.2665	0.218	0.2971	0.2716	0.3116	0.4806	0.6142
chromosome_12:5303470-5303550	N1	Cre12.g529050.v5.5	0.01	0.01	0.01	0.01	0.01	0.01	0.01	0.01	0.01	0.01	0.01	0.01	0.01	0.01	0.01	0.01	0.01	0.01	0.01	0.01	0.01	0.01	0.01	0.0879	0.01	0.01	0.01	0.01
chromosome_12:5314172-5314296	N1	Cre12.g529150.v5.5	0.01	0.01	0.01	0.01	0.01	0.01	0.01	0.01	0.01	0.01	0.01	0.01	0.01	0.01	0.0108	0.015	0.0183	0.01	0.0262	0.0288	0.0402	0.0563	0.0453	0.0467	0.01	0.01	0.0233	0.0739
chromosome_12:5314360-5314517	N1	Cre12.g529150.v5.5	0.01	0.01	0.01	0.01	0.01	0.01	0.01	0.01	0.01	0.01	0.01	0.01	0.01	0.01	0.0091	0.0147	0.014	0.025	0.0296	0.0437	0.062	0.0767	0.0671	0.0582	0.033	0.0718	0.0599	0.0572
chromosome_12:5314552-5314699	N1	Cre12.g529150.v5.5	0.01	0.01	0.01	0.01	0.01	0.01	0.01	0.01	0.01	0.01	0.01	0.01	0.01	0.01	0.01	0.0114	0.0086	0.01	0.0248	0.0287	0.0618	0.0795	0.0735	0.0788	0.0475	0.01	0.0697	0.0479
chromosome_12:5362165-5362347	N1	Cre12.g529600.v5.5	0.0533	0.01	0.01	0.01	0.01	0.01	0.01	0.01	0.01	0.01	0.01	0.01	0.01	0.01	0.01	0.01	0.01	0.01	0.01	0.01	0.01	0.01	0.01	0.01	0.01	0.01	0.0209	0.01
chromosome_12:5395322-5395489	N1	Cre12.g529850.v5.5	0.01	0.01	0.01	0.01	0.01	0.01	0.1875	0.01	0.01	0.01	0.01	0.01	0.01	0.01	0.01	0.01	0.01	0.01	0.01	0.01	0.01	0.01	0.01	0.01	0.01	0.01	0.01	0.01
chromosome_12:5606586-5606706	N1	Cre12.g532000.v5.5	0.01	0.01	0.01	0.01	0.01	0.01	0.01	0.01	0.01	0.01	0.01	0.01	0.01	0.01	0.01	0.01	0.01	0.01	0.01	0.01	0.01	0.01	0.01	0.0655	0.01	0.01	0.01	0.01
chromosome_12:598911-599097	N1	Cre12.g492500.v5.5	0.01	0.01	0.01	0.01	0.01	0.01	0.01	0.01	0.01	0.01	0.01	0.01	0.01	0.01	0.01	0.01	0.0498	0.01	0.0548	0.01	0.01	0.01	0.01	0.01	0.01	0.01	0.01	0.01
chromosome_12:6223076-6223171	N1	Cre12.g536750.v5.5	0.01	0.01	0.01	0.01	0.01	0.01	0.01	0.01	0.01	0.01	0.01	0.01	0.01	0.01	0.01	0.01	0.01	0.01	0.01	0.01	0.01	0.01	0.0314	0.01	0.0394	0.0528	0.01	0.01
chromosome_12:625300-625386	N5	Cre12.g492300.v5.5	0.0498	0.01	0.01	0.01	0.01	0.01	0.01	0.01	0.0468	0.0532	0.0431	0.0596	0.0463	0.0436	0.0375	0.076	0.0618	0.0476	0.0697	0.091	0.0871	0.0784	0.0698	0.0665	0.0541	0.0656	0.0384	0.0479
chromosome_12:6272328-6272801	N1	Cre12.g537100.v5.5	0.0082	0.01	0.01	0.01	0.01	0.01	0.01	0.01	0.01	0.01	0.01	0.01	0.01	0.01	0.01	0.01	0.01	0.01	0.01	0.01	0.01	0.0389	0.0498	0.0315	0.01	0.0752	0.01	0.01
chromosome_12:6272937-6273682	N1	Cre12.g537100.v5.5	0.01	0.01	0.01	0.01	0.01	0.01	0.01	0.01	0.01	0.01	0.01	0.01	0.01	0.01	0.01	0.01	0.01	0.01	0.01	0.01	0.01	0.01	0.0722	0.01	0.01	0.01	0.01	0.01
chromosome_12:6523298-6523472	N1	Cre12.g538850.v5.5	0.01	0.01	0.01	0.01	0.01	0.01	0.01	0.01	0.01	0.01	0.01	0.01	0.01	0.01	0.01	0.01	0.01	0.01	0.0547	0.01	0.01	0.0625	0.01	0.01	0.01	0.01	0.01	0.01
chromosome_12:65289-66680	N1	Cre12.g483750.v5.5	0.01	0.01	0.01	0.01	0.01	0.01	0.01	0.01	0.01	0.01	0.01	0.01	0.01	0.01	0.01	0.01	0.0247	0.01	0.01	0.01	0.01	0.01	0.01	0.0519	0.01	0.1165	0.01	0.01
chromosome_12:6534235-6534455	N1	Cre12.g538950.v5.5	0.0742	0.01	0.01	0.01	0.01	0.01	0.01	0.01	0.01	0.01	0.01	0.01	0.01	0.01	0.01	0.01	0.01	0.01	0.01	0.01	0.01	0.01	0.01	0.01	0.01	0.01	0.01	0.01
chromosome_12:66753-66868	N5	Cre12.g483750.v5.5	0.01	0.01	0.01	0.01	0.01	0.01	0.01	0.01	0.01	0.01	0.01	0.01	0.01	0.01	0.0257	0.0381	0.0835	0.01	0.0781	0.0813	0.1134	0.1259	0.1678	0.1376	0.1472	0.1606	0.1209	0.1131
chromosome_12:684933-685100	N1	Cre12.g493404.v5.5	0.01	0.01	0.01	0.01	0.01	0.01	0.01	0.01	0.01	0.01	0.01	0.01	0.01	0.01	0.01	0.01	0.01	0.01	0.01	0.01	0.01	0.01	0.01	0.01	0.0784	0.01	0.01	0.063
chromosome_12:6942605-6942853	N5	Cre12.g560450.v5.5	0.01	0.01	0.01	0.01	0.01	0.01	0.01	0.2105	0.01	0.01	0.01	0.01	0.01	0.01	0.087	0.01	0.01	0.01	0.01	0.01	0.01	0.01	0.01	0.01	0.01	0.01	0.4194	0.01
chromosome_12:6956554-6956635	N1	Cre12.g560300.v5.5	0.01	0.01	0.01	0.01	0.01	0.01	0.01	0.01	0.01	0.01	0.01	0.01	0.01	0.01	0.01	0.01	0.2338	0.01	0.01	0.01	0.01	0.01	0.01	0.01	0.01	0.01	0.01	0.01
chromosome_12:7254845-7254925	N1	Cre12.g558150.v5.5	0.1055	0.01	0.01	0.01	0.01	0.01	0.01	0.01	0.01	0.01	0.01	0.01	0.01	0.01	0.01	0.01	0.1791	0.01	0.01	0.01	0.01	0.01	0.01	0.01	0.01	0.01	0.01	0.01
chromosome_12:7264285-7264825	N5	Cre12.g558000.v5.5	0.0547	0.01	0.01	0.01	0.01	0.0821	0.0769	0.066	0.1156	0.01	0.0808	0.01	0.0586	0.01	0.01	0.0542	0.01	0.01	0.01	0.01	0.0909	0.1489	0.1368	0.01	0.01	0.1136	0.01	0.0989
chromosome_12:7269562-7269816	N1	Cre12.g557900.v5.5	0.01	0.01	0.01	0.01	0.01	0.01	0.01	0.01	0.01	0.01	0.01	0.01	0.01	0.01	0.01	0.01	0.01	0.01	0.01	0.01	0.01	0.01	0.01	0.01	0.01	0.0778	0.01	0.01
chromosome_12:7785243-7785591	N5	Cre12.g553600.v5.5	0.01	0.01	0.01	0.01	0.01	0.01	0.01	0.01	0.01	0.01	0.01	0.01	0.01	0.01	0.01	0.01	0.01	0.01	0.1341	0.234	0.4043	0.01	0.01	0.363	0.2154	0.01	0.01	0.01
chromosome_12:7979591-7979679	N1	Cre12.g552100.v5.5	0.01	0.01	0.1264	0.01	0.01	0.01	0.01	0.01	0.01	0.01	0.01	0.01	0.01	0.01	0.01	0.01	0.0698	0.01	0.0466	0.01	0.0766	0.1169	0.01	0.01	0.01	0.01	0.01	0.01
chromosome_12:8317719-8317871	N5	Cre12.g549750.v5.5	0.0566	0.01	0.01	0.0348	0.0636	0.0429	0.0767	0.0325	0.01	0.01	0.0246	0.01	0.0277	0.0208	0.0088	0.0279	0.027	0.01	0.0465	0.0367	0.0688	0.0714	0.0703	0.0749	0.0665	0.1038	0.0744	0.1104
chromosome_12:8367560-8367642	N1	Cre12.g549200.v5.5	0.01	0.01	0.01	0.01	0.01	0.01	0.01	0.1139	0.01	0.01	0.01	0.01	0.01	0.01	0.01	0.01	0.01	0.01	0.01	0.01	0.01	0.01	0.01	0.01	0.01	0.01	0.01	0.01
chromosome_12:8523524-8523582	N1	Cre12.g547734.v5.5	0.01	0.01	0.01	0.01	0.01	0.01	0.01	0.01	0.01	0.01	0.01	0.01	0.01	0.01	0.01	0.01	0.01	0.01	0.01	0.01	0.01	0.01	0.01	0.01	0.01	0.01	0.1188	0.01
chromosome_12:8551592-8551761	N4	Cre12.g547500.v5.5	0.01	0.29	0.3296	0.3029	0.3958	0.2686	0.3122	0.3476	0.3372	0.4579	0.2486	0.3779	0.359	0.5904	0.383	0.4387	0.4966	0.5917	0.409	0.5446	0.5484	0.6011	0.542	0.5703	0.6154	0.6505	0.5903	0.5
chromosome_12:8686888-8687041	N2	Cre12.g546400.v5.5	0.01	0.01	0.01	0.163	0.01	0.01	0.15	0.1803	0.1808	0.1893	0.01	0.01	0.1034	0.01	0.0414	0.0388	0.0357	0.0365	0.033	0.01	0.01	0.0497	0.01	0.076	0.01	0.01	0.0857	0.1239
chromosome_12:8871865-8871992	N5	Cre12.g544700.v5.5	0.01	0.01	0.01	0.01	0.01	0.01	0.01	0.01	0.01	0.01	0.01	0.01	0.01	0.01	0.0674	0.01	0.01	0.01	0.0724	0.01	0.1158	0.01	0.0993	0.1391	0.1038	0.01	0.01	0.0848
chromosome_12:8972181-8973003	N6	Cre12.g544050.v5.5	0.2801	0.1307	0.1456	0.1343	0.1344	0.1122	0.1336	0.1136	0.1129	0.1181	0.0816	0.0745	0.0961	0.01	0.176	0.1739	0.1786	0.1875	0.3096	0.2667	0.3269	0.3718	0.3543	0.3484	0.2875	0.269	0.2947	0.2798
chromosome_12:9189263-9189421	N1	Cre12.g541950.v5.5	0.01	0.01	0.01	0.01	0.01	0.01	0.01	0.01	0.01	0.01	0.01	0.01	0.1446	0.01	0.01	0.01	0.0714	0.01	0.01	0.01	0.01	0.01	0.01	0.01	0.01	0.01	0.01	0.01
chromosome_12:9376992-9377321	N1	Cre12.g540250.v5.5	0.01	0.01	0.01	0.01	0.01	0.1152	0.0743	0.0719	0.0868	0.0991	0.0652	0.01	0.0473	0.0399	0.0296	0.05	0.0331	0.0476	0.0541	0.0528	0.0657	0.0375	0.0418	0.0628	0.0333	0.03	0.0236	0.1063
chromosome_12:9377398-9377515	N1	Cre12.g540250.v5.5	0.0549	0.01	0.01	0.01	0.01	0.01	0.01	0.01	0.01	0.01	0.01	0.01	0.01	0.01	0.01	0.01	0.01	0.01	0.0235	0.0349	0.023	0.0296	0.01	0.0357	0.01	0.0129	0.0084	0.0506
chromosome_12:9485339-9485452	N1	Cre12.g540076.v5.5	0.01	0.01	0.01	0.01	0.01	0.01	0.01	0.01	0.01	0.0158	0.01	0.01	0.01	0.0177	0.01	0.01	0.0168	0.01	0.0222	0.01	0.0476	0.01	0.01	0.01	0.01	0.01	0.0391	0.0584
chromosome_12:9528408-9528566	N1	Cre12.g543902.v5.5	0.01	0.01	0.01	0.01	0.01	0.01	0.01	0.01	0.01	0.01	0.01	0.01	0.01	0.01	0.01	0.01	0.01	0.01	0.01	0.01	0.01	0.01	0.01	0.01	0.01	0.01	0.0625	0.01
chromosome_12:9528784-9528925	N5	Cre12.g543902.v5.5	0.01	0.01	0.01	0.01	0.01	0.01	0.01	0.01	0.01	0.01	0.01	0.01	0.01	0.01	0.1279	0.01	0.1034	0.01	0.1484	0.01	0.117	0.0987	0.01	0.01	0.0853	0.0942	0.1148	0.1429
chromosome_12:9529058-9529199	N5	Cre12.g543902.v5.5	0.01	0.01	0.01	0.01	0.01	0.01	0.01	0.01	0.01	0.01	0.01	0.01	0.01	0.01	0.0652	0.01	0.1631	0.01	0.121	0.1368	0.084	0.1074	0.1119	0.1022	0.1111	0.069	0.0931	0.1268
chromosome_12:9529267-9529422	N1	Cre12.g543902.v5.5	0.01	0.01	0.01	0.01	0.01	0.01	0.01	0.01	0.01	0.01	0.01	0.01	0.01	0.01	0.01	0.01	0.0779	0.01	0.01	0.01	0.01	0.01	0.01	0.0995	0.0862	0.0849	0.0801	0.1435
chromosome_12:9538166-9538375	N6	Cre12.g545177.v5.5	0.01	0.01	0.01	0.01	0.01	0.0698	0.1197	0.1194	0.01	0.01	0.01	0.01	0.0606	0.1564	0.0727	0.1456	0.15	0.01	0.1163	0.171	0.25	0.2035	0.2516	0.1887	0.1364	0.0915	0.2026	0.2158
chromosome_12:9538460-9538545	N5	Cre12.g545177.v5.5	0.01	0.01	0.01	0.01	0.01	0.01	0.01	0.01	0.0727	0.01	0.01	0.01	0.01	0.01	0.0411	0.0915	0.0659	0.01	0.079	0.0945	0.1411	0.1094	0.1015	0.0951	0.0939	0.0478	0.0865	0.1462
chromosome_12:9538691-9538761	N1	Cre12.g545177.v5.5	0.01	0.01	0.01	0.01	0.01	0.01	0.01	0.01	0.01	0.01	0.01	0.01	0.01	0.01	0.01	0.01	0.0344	0.01	0.0507	0.01	0.01	0.01	0.01	0.01	0.01	0.01	0.01	0.01
chromosome_12:9553282-9553565	N6	Cre12.g546452.v5.5	0.01	0.01	0.01	0.01	0.01	0.01	0.01	0.01	0.01	0.01	0.01	0.01	0.01	0.01	0.01	0.01	0.01	0.01	0.2133	0.01	0.01	0.2838	0.4	0.3286	0.2222	0.01	0.2414	0.2184
chromosome_12:9565967-9566076	N1	Cre12.g547302.v5.5	0.01	0.01	0.01	0.01	0.01	0.01	0.01	0.01	0.01	0.01	0.01	0.01	0.01	0.01	0.01	0.01	0.01	0.01	0.01	0.01	0.01	0.01	0.01	0.01	0.0529	0.01	0.0408	0.0833
chromosome_13:1081184-1081330	N1	Cre13.g569000.v5.5	0.01	0.01	0.01	0.01	0.01	0.1964	0.01	0.01	0.01	0.01	0.01	0.01	0.01	0.01	0.01	0.01	0.1185	0.01	0.01	0.01	0.01	0.01	0.01	0.01	0.01	0.01	0.0483	0.01
chromosome_13:10890-11151	N1	Cre13.g561800.v5.5	0.01	0.01	0.01	0.01	0.01	0.1184	0.01	0.01	0.01	0.01	0.01	0.01	0.01	0.01	0.0914	0.01	0.1082	0.01	0.01	0.01	0.01	0.01	0.01	0.01	0.01	0.01	0.1466	0.01
chromosome_13:1279246-1279743	N5	Cre13.g570900.v5.5	0.1563	0.01	0.01	0.01	0.01	0.1458	0.2464	0.01	0.01	0.01	0.01	0.01	0.01	0.01	0.0942	0.01	0.07	0.01	0.0629	0.01	0.1244	0.1011	0.0903	0.01	0.0475	0.01	0.0432	0.2326
chromosome_13:157340-157746	N1	Cre13.g563200.v5.5	0.0861	0.01	0.01	0.01	0.01	0.01	0.01	0.01	0.01	0.01	0.01	0.01	0.01	0.01	0.01	0.01	0.01	0.01	0.01	0.01	0.01	0.01	0.01	0.01	0.01	0.01	0.01	0.01
chromosome_13:1692340-1692445	N4	Cre13.g574250.v5.5	0.01	0.01	0.3483	0.2327	0.01	0.2385	0.3699	0.3846	0.2449	0.01	0.01	0.1463	0.2805	0.5	0.4856	0.5086	0.5627	0.6121	0.7067	0.7105	0.7842	0.8061	0.8112	0.8488	0.754	0.5322	0.5203	0.662
chromosome_13:1695337-1695414	N1	Cre13.g574250.v5.5	0.01	0.01	0.1083	0.01	0.01	0.0474	0.01	0.01	0.01	0.1024	0.01	0.01	0.01	0.0816	0.01	0.01	0.01	0.01	0.01	0.01	0.01	0.01	0.01	0.0108	0.01	0.01	0.0171	0.016
chromosome_13:1796004-1796189	N1	Cre13.g575000.v5.5	0.01	0.01	0.01	0.01	0.01	0.01	0.01	0.01	0.01	0.01	0.01	0.01	0.01	0.01	0.0549	0.01	0.01	0.01	0.01	0.01	0.01	0.01	0.01	0.01	0.01	0.01	0.01	0.01
chromosome_13:1898123-1899259	N8	Cre13.g575900.v5.5	0.1783	0.01	0.2019	0.2004	0.2808	0.2236	0.1887	0.1916	0.2108	0.1282	0.1034	0.01	0.0695	0.0812	0.1013	0.1235	0.1521	0.2093	0.2149	0.319	0.3739	0.485	0.4876	0.504	0.4095	0.4321	0.3463	0.4255
chromosome_13:207746-207919	N6	Cre13.g563500.v5.5	0.01	0.01	0.01	0.01	0.01	0.01	0.01	0.01	0.01	0.01	0.01	0.01	0.01	0.01	0.01	0.01	0.01	0.01	0.01	0.01	0.01	0.01	0.4524	0.3673	0.5	0.3409	0.2292	0.2178
chromosome_13:2104285-2104516	N1	Cre13.g577600.v5.5	0.1071	0.1304	0.01	0.0848	0.01	0.01	0.01	0.0868	0.1722	0.01	0.01	0.01	0.01	0.01	0.01	0.01	0.01	0.01	0.01	0.01	0.01	0.01	0.01	0.01	0.01	0.01	0.0199	0.01
chromosome_13:217795-217999	N5	Cre13.g563550.v5.5	0.01	0.01	0.01	0.01	0.01	0.1519	0.01	0.01	0.01	0.01	0.01	0.01	0.01	0.01	0.0915	0.01	0.01	0.01	0.01	0.01	0.01	0.01	0.01	0.2513	0.185	0.1231	0.128	0.1744
chromosome_13:2563420-2563988	N1	Cre13.g580900.v5.5	0.0437	0.01	0.01	0.01	0.01	0.01	0.01	0.01	0.01	0.01	0.01	0.01	0.01	0.01	0.01	0.01	0.01	0.01	0.01	0.01	0.01	0.0444	0.01	0.01	0.01	0.01	0.01	0.0682
chromosome_13:2585875-2586158	N1	Cre13.g581050.v5.5	0.01	0.01	0.01	0.01	0.01	0.0532	0.0718	0.01	0.01	0.01	0.01	0.01	0.01	0.01	0.01	0.01	0.01	0.01	0.01	0.01	0.01	0.01	0.01	0.01	0.01	0.01	0.01	0.01
chromosome_13:2680717-2682024	N1	Cre13.g581900.v5.5	0.01	0.01	0.01	0.01	0.01	0.01	0.01	0.01	0.01	0.01	0.01	0.01	0.01	0.01	0.01	0.01	0.01	0.01	0.01	0.01	0.01	0.01	0.01	0.01	0.01	0.01	0.0823	0.01
chromosome_13:2798912-2799040	N1	Cre13.g582900.v5.5	0.01	0.01	0.01	0.01	0.01	0.01	0.01	0.01	0.01	0.01	0.01	0.01	0.01	0.01	0.01	0.01	0.01	0.01	0.01	0.0677	0.01	0.01	0.0794	0.01	0.01	0.01	0.0857	0.1525
chromosome_13:2801525-2801586	N1	Cre13.g583000.v5.5	0.01	0.01	0.01	0.01	0.01	0.01	0.01	0.01	0.01	0.01	0.01	0.01	0.01	0.01	0.01	0.01	0.01	0.01	0.0485	0.01	0.01	0.01	0.01	0.01	0.0511	0.01	0.0395	0.01
chromosome_13:2900121-2900640	N1	Cre13.g583550.v5.5	0.01	0.01	0.01	0.01	0.01	0.01	0.01	0.01	0.01	0.01	0.01	0.01	0.01	0.01	0.01	0.01	0.01	0.01	0.01	0.01	0.01	0.01	0.01	0.01	0.1023	0.0734	0.01	0.01
chromosome_13:2901248-2901835	N1	Cre13.g583550.v5.5	0.01	0.01	0.01	0.01	0.01	0.01	0.01	0.01	0.01	0.01	0.01	0.01	0.01	0.01	0.01	0.01	0.01	0.01	0.01	0.01	0.01	0.01	0.01	0.01	0.0505	0.0465	0.0221	0.01
chromosome_13:2961463-2961634	N1	Cre13.g583935.v5.5	0.01	0.01	0.01	0.01	0.01	0.01	0.01	0.01	0.01	0.01	0.036	0.0353	0.01	0.031	0.01	0.0319	0.0236	0.0514	0.0429	0.01	0.01	0.01	0.01	0.01	0.0363	0.01	0.0331	0.01
chromosome_13:2967241-2967419	N1	Cre13.g583972.v5.5	0.01	0.01	0.01	0.01	0.01	0.01	0.01	0.01	0.01	0.01	0.01	0.01	0.01	0.01	0.01	0.01	0.01	0.01	0.01	0.01	0.01	0.01	0.01	0.1743	0.01	0.01	0.0839	0.01
chromosome_13:3060613-3060735	N1	Cre13.g584500.v5.5	0.01	0.01	0.1765	0.01	0.01	0.01	0.01	0.01	0.01	0.01	0.01	0.01	0.01	0.01	0.01	0.01	0.01	0.01	0.01	0.01	0.01	0.01	0.01	0.01	0.01	0.01	0.01	0.01
chromosome_13:3311841-3312061	N1	Cre13.g586450.v5.5	0.01	0.01	0.01	0.01	0.01	0.01	0.01	0.01	0.01	0.01	0.01	0.01	0.01	0.01	0.01	0.01	0.01	0.01	0.01	0.01	0.01	0.01	0.01	0.01	0.2	0.1335	0.01	0.01
chromosome_13:3312210-3312377	N1	Cre13.g586450.v5.5	0.01	0.01	0.01	0.01	0.01	0.01	0.01	0.01	0.01	0.01	0.01	0.01	0.01	0.01	0.01	0.01	0.01	0.01	0.01	0.01	0.01	0.01	0.01	0.01	0.0594	0.0236	0.01	0.01
chromosome_13:3347484-3347643	N1	Cre13.g586700.v5.5	0.01	0.01	0.01	0.01	0.01	0.01	0.01	0.01	0.01	0.01	0.01	0.01	0.01	0.01	0.0173	0.01	0.0161	0.01	0.0226	0.0189	0.01	0.0401	0.0533	0.0467	0.0192	0.011	0.0291	0.0294
chromosome_13:3347701-3347894	N1	Cre13.g586700.v5.5	0.01	0.01	0.01	0.01	0.01	0.01	0.01	0.01	0.01	0.01	0.01	0.01	0.01	0.01	0.01	0.01	0.01	0.01	0.025	0.0331	0.0303	0.01	0.0389	0.0515	0.026	0.01	0.0142	0.0282
chromosome_13:3380617-3381639	N5	Cre13.g586916.v5.5	0.01	0.01	0.01	0.01	0.01	0.016	0.0132	0.01	0.0066	0.01	0.0075	0.01	0.0055	0.0051	0.0058	0.0105	0.0121	0.01	0.018	0.038	0.0703	0.1163	0.1433	0.01	0.01	0.01	0.215	0.2837
chromosome_13:3405562-3405637	N5	Cre13.g587150.v5.5	0.4834	0.01	0.01	0.01	0.01	0.2731	0.01	0.01	0.01	0.01	0.01	0.1291	0.01	0.01	0.0897	0.1119	0.01	0.1231	0.01	0.01	0.01	0.01	0.01	0.1635	0.01	0.1355	0.0976	0.1947
chromosome_13:3418191-3418328	N2	Cre13.g587250.v5.5	0.01	0.01	0.01	0.01	0.01	0.01	0.01	0.01	0.01	0.6667	0.56	0.01	0.413	0.3415	0.339	0.266	0.1939	0.1569	0.1228	0.01	0.01	0.01	0.01	0.01	0.01	0.01	0.01	0.01
chromosome_13:3464598-3464707	N1	Cre13.g587550.v5.5	0.01	0.01	0.01	0.01	0.01	0.01	0.01	0.01	0.01	0.01	0.01	0.0614	0.01	0.01	0.01	0.0315	0.0199	0.01	0.01	0.01	0.01	0.01	0.01	0.01	0.01	0.01	0.0177	0.01
chromosome_13:3796696-3796830	N1	Cre13.g589870.v5.5	0.01	0.01	0.0633	0.01	0.01	0.0553	0.0617	0.0682	0.01	0.01	0.01	0.01	0.01	0.01	0.0172	0.01	0.01	0.01	0.01	0.01	0.01	0.01	0.01	0.01	0.01	0.01	0.01	0.01
chromosome_13:3796934-3797372	N1	Cre13.g589870.v5.5	0.01	0.01	0.01	0.01	0.01	0.01	0.01	0.01	0.01	0.01	0.01	0.01	0.01	0.01	0.0303	0.01	0.01	0.01	0.01	0.01	0.01	0.01	0.01	0.01	0.01	0.01	0.0979	0.01
chromosome_13:3912652-3913074	N1	Cre13.g590600.v5.5	0.01	0.01	0.01	0.01	0.01	0.01	0.01	0.01	0.01	0.01	0.01	0.01	0.01	0.01	0.01	0.01	0.01	0.01	0.01	0.01	0.01	0.01	0.01	0.01	0.01	0.01	0.0548	0.0397
chromosome_13:4103557-4103867	N1	Cre13.g591501.v5.5	0.01	0.01	0.01	0.01	0.01	0.01	0.01	0.01	0.01	0.01	0.01	0.01	0.01	0.01	0.01	0.01	0.0722	0.01	0.01	0.01	0.01	0.01	0.01	0.01	0.01	0.01	0.01	0.01
chromosome_13:4135085-4135421	N1	Cre13.g591750.v5.5	0.01	0.01	0.01	0.01	0.01	0.01	0.01	0.01	0.01	0.01	0.01	0.01	0.01	0.01	0.01	0.01	0.1712	0.01	0.01	0.01	0.01	0.01	0.01	0.01	0.01	0.01	0.0661	0.01
chromosome_13:4148034-4148282	N1	Cre13.g591851.v5.5	0.01	0.01	0.01	0.01	0.01	0.01	0.01	0.01	0.01	0.01	0.01	0.01	0.01	0.01	0.01	0.01	0.01	0.01	0.01	0.01	0.01	0.01	0.01	0.01	0.0965	0.083	0.01	0.01
chromosome_13:4152573-4152699	N1	Cre13.g591951.v5.5	0.01	0.01	0.01	0.01	0.01	0.0683	0.01	0.0354	0.0448	0.0511	0.01	0.01	0.01	0.01	0.01	0.01	0.01	0.01	0.1636	0.01	0.01	0.01	0.01	0.2889	0.01	0.01	0.01	0.01
chromosome_13:4196325-4196459	N5	Cre13.g592300.v5.5	0.0993	0.01	0.01	0.01	0.01	0.01	0.01	0.01	0.01	0.01	0.01	0.01	0.01	0.01	0.01	0.01	0.01	0.01	0.01	0.01	0.1053	0.2143	0.01	0.1719	0.01	0.01	0.1683	0.01
chromosome_13:4366296-4366446	N5	Cre13.g602850.v5.5	0.2564	0.01	0.01	0.01	0.01	0.01	0.01	0.01	0.01	0.01	0.01	0.01	0.01	0.01	0.01	0.1321	0.082	0.01	0.01	0.01	0.254	0.01	0.01	0.01	0.01	0.01	0.1848	0.01
chromosome_13:4413296-4413517	N1	Cre13.g603176.v5.5	0.01	0.01	0.01	0.01	0.01	0.01	0.01	0.01	0.1538	0.01	0.01	0.01	0.01	0.01	0.01	0.01	0.01	0.01	0.01	0.01	0.01	0.01	0.01	0.01	0.01	0.01	0.01	0.01
chromosome_13:4509954-4510162	N1	Cre13.g602500.v5.5	0.01	0.01	0.01	0.01	0.01	0.01	0.01	0.01	0.01	0.01	0.01	0.01	0.01	0.01	0.01	0.01	0.01	0.01	0.01	0.01	0.01	0.01	0.01	0.01	0.01	0.1007	0.01	0.01
chromosome_13:4510901-4511134	N1	Cre13.g602500.v5.5	0.01	0.01	0.01	0.01	0.01	0.01	0.01	0.01	0.01	0.01	0.01	0.01	0.01	0.01	0.01	0.01	0.01	0.01	0.01	0.01	0.01	0.01	0.01	0.01	0.219	0.1591	0.01	0.01
chromosome_13:4511280-4511509	N1	Cre13.g602500.v5.5	0.01	0.01	0.01	0.01	0.01	0.01	0.01	0.01	0.01	0.01	0.01	0.01	0.01	0.01	0.01	0.01	0.01	0.01	0.01	0.01	0.01	0.01	0.01	0.01	0.01	0.0811	0.01	0.01
chromosome_13:4795447-4795774	N5	Cre13.g605100.v5.5	0.01	0.01	0.01	0.01	0.01	0.01	0.01	0.01	0.01	0.01	0.01	0.01	0.01	0.01	0.01	0.01	0.01	0.01	0.01	0.01	0.01	0.01	0.01	0.1111	0.1486	0.1429	0.1328	0.01
chromosome_13:5068053-5068214	N1	Cre13.g607100.v5.5	0.01	0.01	0.01	0.01	0.01	0.01	0.01	0.01	0.01	0.01	0.01	0.01	0.01	0.01	0.01	0.01	0.01	0.01	0.01	0.01	0.01	0.01	0.01	0.01	0.01	0.0531	0.0894	0.01
chromosome_13:5183680-5184064	N6	Cre13.g607850.v5.5	0.01	0.01	0.1719	0.01	0.01	0.2297	0.2268	0.161	0.01	0.01	0.01	0.01	0.01	0.01	0.01	0.01	0.01	0.01	0.01	0.0415	0.0775	0.1654	0.1291	0.1732	0.2483	0.1913	0.2588	0.2846
chromosome_13:606756-606913	N4	Cre13.g565700.v5.5	0.5854	0.766	0.459	0.566	0.6429	0.3951	0.3933	0.4842	0.5089	0.5294	0.4458	0.5455	0.5577	0.3968	0.5667	0.4839	0.6777	0.5833	0.568	0.5281	0.4857	0.5612	0.5517	0.428	0.504	0.3475	0.4199	0.551
chromosome_13:608131-608304	N1	Cre13.g565700.v5.5	0.1028	0.01	0.01	0.01	0.01	0.01	0.01	0.01	0.01	0.01	0.01	0.01	0.01	0.01	0.01	0.01	0.01	0.01	0.01	0.01	0.01	0.01	0.01	0.01	0.01	0.01	0.01	0.01
chromosome_13:608389-608564	N1	Cre13.g565700.v5.5	0.01	0.01	0.01	0.01	0.01	0.2278	0.01	0.01	0.1829	0.01	0.01	0.01	0.01	0.01	0.01	0.01	0.01	0.01	0.01	0.01	0.0783	0.01	0.01	0.01	0.01	0.01	0.01	0.01
chromosome_13:609099-609821	N8	Cre13.g565700.v5.5	0.01	0.01	0.2787	0.01	0.01	0.2222	0.3853	0.2349	0.2478	0.2588	0.192	0.01	0.1828	0.1791	0.1779	0.163	0.1741	0.1488	0.2866	0.3512	0.3818	0.5316	0.3731	0.578	0.4596	0.4293	0.4572	0.3333
chromosome_13:609839-610141	N6	Cre13.g565700.v5.5	0.01	0.01	0.01	0.12	0.01	0.1579	0.2449	0.1575	0.2268	0.1591	0.01	0.01	0.1807	0.01	0.0889	0.01	0.1089	0.1393	0.1911	0.2264	0.3089	0.424	0.2634	0.368	0.3266	0.301	0.297	0.1948
chromosome_13:831864-833455	N5	Cre13.g567250.v5.5	0.01	0.01	0.01	0.01	0.01	0.01	0.01	0.01	0.01	0.01	0.01	0.01	0.01	0.01	0.01	0.01	0.01	0.01	0.01	0.01	0.01	0.3767	0.01	0.01	0.01	0.01	0.4011	0.01
chromosome_13:885716-886093	N1	Cre13.g567550.v5.5	0.01	0.01	0.01	0.01	0.01	0.01	0.01	0.01	0.01	0.01	0.01	0.01	0.01	0.01	0.01	0.01	0.01	0.01	0.01	0.01	0.01	0.01	0.0877	0.0788	0.01	0.01	0.01	0.1122
chromosome_14:1051998-1052301	N1	Cre14.g614600.v5.5	0.01	0.01	0.01	0.01	0.01	0.01	0.01	0.01	0.01	0.01	0.01	0.01	0.01	0.01	0.01	0.01	0.01	0.01	0.01	0.01	0.0549	0.01	0.01	0.01	0.01	0.01	0.01	0.01
chromosome_14:1119976-1120173	N1	Cre14.g615224.v5.5	0.01	0.01	0.01	0.01	0.01	0.0941	0.01	0.01	0.01	0.01	0.01	0.01	0.01	0.01	0.01	0.01	0.01	0.01	0.01	0.01	0.01	0.01	0.01	0.01	0.01	0.01	0.01	0.01
chromosome_14:1121065-1121288	N1	Cre14.g615250.v5.5	0.01	0.01	0.01	0.01	0.01	0.0965	0.0727	0.01	0.25	0.2128	0.1442	0.01	0.01	0.01	0.01	0.01	0.01	0.01	0.01	0.01	0.01	0.01	0.01	0.01	0.01	0.01	0.01	0.01
chromosome_14:1165663-1166043	N5	Cre14.g615750.v5.5	0.01	0.01	0.01	0.01	0.01	0.01	0.2381	0.01	0.01	0.01	0.01	0.01	0.01	0.01	0.01	0.01	0.01	0.01	0.01	0.01	0.01	0.01	0.5161	0.1935	0.01	0.4412	0.3824	0.01
chromosome_14:1268707-1268833	N1	Cre14.g616550.v5.5	0.01	0.01	0.01	0.01	0.01	0.01	0.01	0.01	0.01	0.01	0.01	0.01	0.01	0.01	0.01	0.0891	0.0971	0.01	0.01	0.01	0.01	0.01	0.01	0.01	0.01	0.01	0.0458	0.01
chromosome_14:1268876-1269058	N1	Cre14.g616550.v5.5	0.01	0.01	0.01	0.01	0.01	0.01	0.01	0.01	0.01	0.01	0.01	0.01	0.01	0.01	0.2941	0.1408	0.2231	0.01	0.01	0.01	0.01	0.01	0.01	0.01	0.01	0.01	0.01	0.01
chromosome_14:1274070-1274185	N1	Cre14.g616589.v5.5	0.01	0.01	0.01	0.01	0.01	0.01	0.01	0.01	0.01	0.01	0.01	0.01	0.01	0.01	0.01	0.01	0.2	0.01	0.01	0.01	0.01	0.01	0.01	0.01	0.01	0.01	0.01	0.01
chromosome_14:1288645-1288757	N1	Cre14.g616650.v5.5	0.01	0.01	0.01	0.01	0.01	0.01	0.01	0.01	0.01	0.01	0.01	0.01	0.01	0.01	0.01	0.01	0.01	0.01	0.01	0.01	0.1067	0.01	0.01	0.01	0.01	0.01	0.0415	0.01
chromosome_14:1290254-1290363	N1	Cre14.g616650.v5.5	0.01	0.01	0.01	0.01	0.01	0.01	0.01	0.01	0.01	0.01	0.01	0.01	0.01	0.01	0.01	0.01	0.01	0.01	0.01	0.01	0.01	0.01	0.01	0.01	0.0576	0.01	0.0491	0.0822
chromosome_14:1291423-1291706	N5	Cre14.g616650.v5.5	0.01	0.01	0.01	0.01	0.01	0.01	0.01	0.01	0.01	0.01	0.01	0.01	0.01	0.01	0.01	0.01	0.01	0.01	0.01	0.01	0.01	0.01	0.01	0.24	0.01	0.1852	0.308	0.2578
chromosome_14:1326153-1326334	N1	Cre14.g616950.v5.5	0.01	0.01	0.01	0.01	0.01	0.0792	0.01	0.01	0.01	0.01	0.01	0.01	0.01	0.01	0.01	0.01	0.01	0.01	0.01	0.01	0.01	0.01	0.01	0.01	0.01	0.0924	0.01	0.01
chromosome_14:1355947-1356508	N5	Cre14.g617100.v5.5	0.0608	0.01	0.0899	0.104	0.01	0.01	0.0938	0.01	0.01	0.01	0.0545	0.01	0.0703	0.01	0.0903	0.0542	0.0436	0.01	0.0309	0.01	0.0948	0.0915	0.0825	0.0798	0.1224	0.1489	0.0712	0.0677
chromosome_14:1925411-1925675	N1	Cre14.g621000.v5.5	0.01	0.01	0.01	0.01	0.01	0.01	0.01	0.01	0.01	0.2409	0.01	0.01	0.01	0.01	0.1257	0.01	0.2053	0.01	0.01	0.01	0.01	0.01	0.01	0.01	0.01	0.01	0.01	0.01
chromosome_14:1970367-1970989	N7	Cre14.g621300.v5.5	0.2645	0.3949	0.4819	0.4351	0.3037	0.4123	0.3505	0.3274	0.2535	0.2175	0.1447	0.2	0.2206	0.2845	0.2383	0.2078	0.2318	0.3014	0.2114	0.3756	0.3679	0.4518	0.3896	0.4184	0.4614	0.4216	0.4215	0.4916
chromosome_14:2012300-2012485	N1	Cre14.g621650.v5.5	0.01	0.01	0.0872	0.0631	0.0475	0.01	0.01	0.01	0.01	0.01	0.01	0.01	0.01	0.01	0.01	0.01	0.01	0.01	0.01	0.01	0.01	0.01	0.01	0.01	0.01	0.0378	0.0474	0.01
chromosome_14:2183931-2184312	N1	Cre14.g622550.v5.5	0.01	0.01	0.01	0.01	0.01	0.01	0.01	0.01	0.01	0.01	0.01	0.01	0.01	0.01	0.01	0.01	0.0903	0.01	0.01	0.01	0.01	0.01	0.01	0.01	0.01	0.01	0.01	0.01
chromosome_14:2353424-2353542	N5	Cre14.g623900.v5.5	0.01	0.01	0.01	0.01	0.01	0.01	0.01	0.01	0.01	0.01	0.01	0.01	0.01	0.01	0.01	0.01	0.1328	0.01	0.01	0.01	0.35	0.01	0.01	0.01	0.1393	0.01	0.1964	0.1341
chromosome_14:2382015-2382374	N1	Cre14.g624201.v5.5	0.01	0.01	0.01	0.01	0.01	0.01	0.01	0.01	0.01	0.01	0.01	0.01	0.01	0.01	0.01	0.01	0.01	0.01	0.01	0.01	0.0606	0.01	0.01	0.01	0.01	0.01	0.01	0.01
chromosome_14:2542514-2542787	N1	Cre14.g625500.v5.5	0.01	0.01	0.01	0.01	0.01	0.01	0.1184	0.01	0.01	0.01	0.01	0.01	0.01	0.01	0.01	0.01	0.01	0.01	0.01	0.01	0.01	0.01	0.01	0.01	0.01	0.01	0.01	0.01
chromosome_14:3276468-3276779	N5	Cre14.g629600.v5.5	0.01	0.01	0.01	0.01	0.01	0.01	0.01	0.01	0.01	0.01	0.01	0.01	0.01	0.01	0.0805	0.01	0.01	0.01	0.1935	0.01	0.01	0.01	0.01	0.4386	0.01	0.01	0.2807	0.1923
chromosome_14:37029-37095	N2	Cre14.g608100.v5.5	0.085	0.01	0.01	0.01	0.01	0.01	0.3125	0.01	0.1667	0.01	0.1446	0.01	0.4681	0.322	0.4143	0.01	0.01	0.01	0.375	0.3731	0.1959	0.1852	0.1455	0.1739	0.1143	0.01	0.01	0.01
chromosome_14:3839003-3839112	N1	Cre14.g632750.v5.5	0.01	0.01	0.01	0.01	0.01	0.01	0.01	0.01	0.01	0.01	0.01	0.01	0.01	0.01	0.01	0.01	0.01	0.01	0.01	0.01	0.01	0.01	0.01	0.01	0.01	0.01	0.0599	0.01
chromosome_14:3924680-3924765	N6	Cre14.g632950.v5.5	0.1329	0.01	0.01	0.01	0.01	0.01	0.1	0.0993	0.1429	0.01	0.1081	0.01	0.01	0.01	0.1339	0.01	0.1466	0.01	0.01	0.01	0.01	0.1935	0.1414	0.2061	0.2444	0.2707	0.3308	0.2846
chromosome_14:582622-583866	N1	Cre14.g611850.v5.5	0.01	0.01	0.01	0.01	0.01	0.01	0.01	0.01	0.01	0.01	0.01	0.01	0.01	0.01	0.01	0.01	0.01	0.01	0.01	0.01	0.01	0.01	0.01	0.01	0.01	0.01	0.1322	0.01
chromosome_14:753587-753778	N7	Cre14.g612800.v5.5	0.2762	0.2643	0.2547	0.2835	0.2749	0.3145	0.3005	0.2896	0.3007	0.3147	0.3054	0.2063	0.2278	0.2727	0.3524	0.2828	0.3062	0.3064	0.239	0.2862	0.2897	0.328	0.3699	0.3621	0.3639	0.3568	0.3778	0.3376
chromosome_14:968785-969177	N1	Cre14.g613950.v5.5	0.01	0.01	0.01	0.01	0.01	0.01	0.01	0.01	0.01	0.01	0.01	0.01	0.01	0.01	0.01	0.01	0.01	0.01	0.01	0.01	0.01	0.01	0.01	0.01	0.01	0.0728	0.01	0.01
chromosome_15:171613-172010	N1	Cre15.g635067.v5.5	0.01	0.01	0.01	0.01	0.01	0.0556	0.01	0.0852	0.1034	0.01	0.01	0.01	0.01	0.01	0.01	0.01	0.01	0.01	0.01	0.01	0.01	0.01	0.01	0.01	0.01	0.01	0.01	0.01
chromosome_15:316748-317105	N1	Cre15.g635717.v5.5	0.01	0.01	0.01	0.01	0.01	0.01	0.3171	0.01	0.01	0.01	0.01	0.01	0.01	0.01	0.01	0.01	0.01	0.01	0.01	0.01	0.01	0.1176	0.01	0.01	0.01	0.01	0.01	0.1781
chromosome_15:449609-449932	N5	Cre15.g636450.v5.5	0.2212	0.01	0.01	0.01	0.01	0.01	0.01	0.01	0.3676	0.1928	0.01	0.01	0.01	0.01	0.102	0.01	0.01	0.01	0.01	0.35	0.01	0.01	0.01	0.01	0.01	0.01	0.01	0.2766
chromosome_15:453030-453933	N1	Cre15.g636500.v5.5	0.01	0.01	0.01	0.01	0.01	0.01	0.01	0.01	0.01	0.01	0.01	0.01	0.01	0.01	0.01	0.01	0.01	0.01	0.01	0.01	0.01	0.01	0.01	0.0692	0.01	0.01	0.0427	0.01
chromosome_15:453965-454126	N5	Cre15.g636500.v5.5	0.01	0.01	0.1553	0.01	0.1667	0.2614	0.01	0.01	0.1293	0.01	0.0743	0.01	0.0448	0.01	0.0847	0.0657	0.0792	0.0947	0.067	0.1008	0.1314	0.1234	0.1595	0.1758	0.1435	0.1174	0.1951	0.1852
chromosome_15:501728-502066	N1	Cre15.g636800.v5.5	0.01	0.01	0.01	0.01	0.01	0.01	0.01	0.01	0.01	0.01	0.01	0.01	0.01	0.01	0.01	0.01	0.01	0.01	0.01	0.01	0.01	0.01	0.01	0.01	0.01	0.1013	0.01	0.01
chromosome_15:512904-513171	N1	Cre15.g636896.v5.5	0.01	0.01	0.01	0.01	0.01	0.01	0.01	0.01	0.01	0.01	0.01	0.01	0.01	0.01	0.01	0.01	0.01	0.01	0.01	0.01	0.01	0.01	0.1408	0.01	0.1215	0.01	0.183	0.01
chromosome_15:529336-529461	N6	Cre15.g637050.v5.5	0.0618	0.01	0.0909	0.01	0.01	0.0568	0.093	0.0687	0.1008	0.01	0.1164	0.01	0.0802	0.0474	0.1062	0.1616	0.1509	0.2	0.1704	0.1728	0.1532	0.2093	0.2628	0.2124	0.1831	0.1694	0.2877	0.2232
chromosome_15:713225-713303	N5	Cre15.g640650.v5.5	0.01	0.01	0.01	0.01	0.01	0.01	0.01	0.01	0.01	0.01	0.01	0.01	0.01	0.01	0.1324	0.2333	0.1864	0.2154	0.01	0.01	0.1719	0.01	0.209	0.2371	0.1923	0.01	0.3854	0.01
chromosome_16:1025397-1025615	N1	Cre16.g649200.v5.5	0.01	0.01	0.01	0.01	0.01	0.01	0.01	0.01	0.01	0.01	0.01	0.01	0.01	0.01	0.01	0.01	0.01	0.01	0.01	0.01	0.01	0.01	0.01	0.01	0.01	0.01	0.0864	0.01
chromosome_16:1083929-1084173	N1	Cre16.g649600.v5.5	0.0803	0.01	0.01	0.01	0.01	0.01	0.01	0.01	0.01	0.01	0.01	0.01	0.01	0.01	0.01	0.01	0.01	0.01	0.01	0.01	0.01	0.01	0.01	0.01	0.01	0.01	0.01	0.01
chromosome_16:110045-110445	N6	Cre16.g695450.v5.5	0.2026	0.01	0.2647	0.2743	0.01	0.1855	0.2143	0.1349	0.2522	0.1714	0.2065	0.01	0.1809	0.1905	0.2137	0.2045	0.1809	0.1926	0.1769	0.2319	0.2122	0.1933	0.3487	0.4317	0.242	0.1633	0.3102	0.4296
chromosome_16:1204548-1204696	N8	Cre16.g650800.v5.5	0.1241	0.0925	0.0495	0.0656	0.0412	0.0393	0.0246	0.0287	0.01	0.0143	0.033	0.0369	0.0753	0.3245	0.3797	0.5142	0.5238	0.5739	0.5701	0.5867	0.6875	0.765	0.7661	0.6791	0.7879	0.72	0.7401	0.8087
chromosome_16:1204801-1204860	N8	Cre16.g650800.v5.5	0.126	0.01	0.0752	0.0628	0.055	0.0417	0.0471	0.0391	0.0262	0.0186	0.0346	0.0215	0.0608	0.2756	0.4344	0.4584	0.4958	0.5478	0.5765	0.5884	0.6496	0.6631	0.7371	0.639	0.7039	0.6131	0.7252	0.7843
chromosome_16:1257666-1257890	N1	Cre16.g651200.v5.5	0.0614	0.01	0.01	0.01	0.01	0.01	0.01	0.01	0.01	0.01	0.0671	0.01	0.0671	0.01	0.0325	0.01	0.0554	0.0759	0.0466	0.0651	0.01	0.01	0.0942	0.069	0.01	0.0769	0.0595	0.067
chromosome_16:1390137-1390234	N1	Cre16.g652150.v5.5	0.01	0.01	0.01	0.01	0.01	0.0887	0.01	0.01	0.01	0.01	0.01	0.01	0.01	0.01	0.01	0.01	0.01	0.01	0.01	0.01	0.01	0.01	0.01	0.01	0.01	0.01	0.01	0.01
chromosome_16:1943640-1943863	N1	Cre16.g656300.v5.5	0.01	0.01	0.01	0.01	0.01	0.0581	0.073	0.01	0.01	0.01	0.01	0.01	0.01	0.01	0.01	0.01	0.01	0.01	0.01	0.01	0.01	0.01	0.01	0.01	0.01	0.01	0.01	0.01
chromosome_16:2074917-2075088	N1	Cre16.g657450.v5.5	0.01	0.01	0.01	0.01	0.01	0.01	0.01	0.01	0.01	0.01	0.01	0.01	0.01	0.01	0.01	0.01	0.01	0.01	0.01	0.01	0.01	0.01	0.0734	0.01	0.01	0.01	0.0673	0.01
chromosome_16:2093796-2094052	N1	Cre16.g657700.v5.5	0.01	0.01	0.01	0.01	0.01	0.01	0.01	0.01	0.01	0.01	0.01	0.01	0.01	0.01	0.01	0.01	0.01	0.01	0.01	0.0839	0.01	0.01	0.01	0.01	0.01	0.01	0.01	0.01
chromosome_16:2128120-2128368	N8	Cre16.g657979.v5.5	0.01	0.01	0.01	0.01	0.01	0.01	0.01	0.01	0.01	0.01	0.01	0.01	0.01	0.01	0.1835	0.2558	0.4478	0.4058	0.5	0.01	0.58	0.5083	0.625	0.6581	0.609	0.6364	0.5668	0.4758
chromosome_16:2129070-2129327	N8	Cre16.g657979.v5.5	0.01	0.01	0.01	0.01	0.01	0.01	0.01	0.01	0.01	0.01	0.01	0.01	0.01	0.5	0.4928	0.5873	0.6301	0.75	0.5086	0.6842	0.7091	0.6786	0.773	0.8247	0.8616	0.8205	0.7348	0.6291
chromosome_16:2129450-2129748	N6	Cre16.g657979.v5.5	0.01	0.01	0.01	0.01	0.01	0.01	0.01	0.01	0.01	0.01	0.01	0.01	0.01	0.01	0.2341	0.01	0.01	0.01	0.01	0.01	0.01	0.4148	0.01	0.393	0.01	0.4094	0.4534	0.221
chromosome_16:2129802-2130059	N6	Cre16.g657979.v5.5	0.01	0.01	0.01	0.01	0.01	0.0863	0.0866	0.0734	0.1236	0.01	0.0593	0.01	0.0416	0.2048	0.153	0.164	0.1612	0.28	0.1517	0.2588	0.3185	0.3427	0.4286	0.3926	0.3251	0.3163	0.3149	0.287
chromosome_16:2130171-2130591	N6	Cre16.g657979.v5.5	0.01	0.01	0.01	0.01	0.01	0.01	0.01	0.01	0.01	0.1104	0.01	0.01	0.01	0.1928	0.138	0.1657	0.1648	0.2368	0.178	0.3245	0.3664	0.3316	0.4458	0.4075	0.4112	0.3471	0.2712	0.2468
chromosome_16:2306894-2307314	N1	Cre16.g659250.v5.5	0.01	0.01	0.01	0.01	0.01	0.01	0.01	0.01	0.01	0.01	0.01	0.01	0.01	0.01	0.01	0.01	0.01	0.01	0.01	0.01	0.01	0.01	0.01	0.01	0.1042	0.0642	0.01	0.01
chromosome_16:2312091-2312427	N1	Cre16.g659350.v5.5	0.01	0.01	0.01	0.01	0.01	0.01	0.01	0.01	0.01	0.01	0.01	0.01	0.01	0.01	0.01	0.01	0.01	0.01	0.01	0.01	0.01	0.01	0.01	0.01	0.2209	0.1383	0.01	0.01
chromosome_16:2312516-2312754	N1	Cre16.g659350.v5.5	0.01	0.01	0.01	0.01	0.01	0.01	0.01	0.0177	0.01	0.01	0.01	0.01	0.01	0.01	0.01	0.01	0.01	0.01	0.01	0.01	0.01	0.01	0.01	0.01	0.1808	0.1935	0.01	0.01
chromosome_16:2312784-2312910	N1	Cre16.g659350.v5.5	0.01	0.01	0.01	0.01	0.01	0.01	0.01	0.01	0.01	0.01	0.01	0.01	0.01	0.01	0.01	0.01	0.01	0.01	0.01	0.01	0.01	0.01	0.01	0.01	0.01	0.1189	0.01	0.01
chromosome_16:2323820-2324103	N1	Cre16.g659500.v5.5	0.01	0.01	0.01	0.01	0.01	0.01	0.01	0.01	0.01	0.01	0.01	0.01	0.01	0.01	0.01	0.01	0.01	0.01	0.01	0.01	0.01	0.01	0.01	0.0974	0.01	0.01	0.01	0.01
chromosome_16:2352094-2352259	N1	Cre16.g659700.v5.5	0.01	0.01	0.01	0.01	0.01	0.01	0.01	0.1553	0.01	0.0225	0.0407	0.0291	0.0486	0.0052	0.0043	0.01	0.0032	0.01	0.01	0.01	0.01	0.01	0.01	0.0049	0.0196	0.0297	0.01	0.01
chromosome_16:258099-258204	N1	Cre16.g694402.v5.5	0.01	0.01	0.01	0.01	0.01	0.0879	0.01	0.01	0.01	0.01	0.01	0.01	0.01	0.01	0.01	0.01	0.01	0.01	0.01	0.01	0.01	0.01	0.01	0.01	0.01	0.01	0.01	0.01
chromosome_16:2584902-2585242	N1	Cre16.g661550.v5.5	0.0461	0.01	0.01	0.01	0.01	0.01	0.01	0.01	0.01	0.01	0.01	0.01	0.01	0.01	0.0228	0.01	0.0313	0.01	0.0565	0.01	0.0949	0.01	0.01	0.01	0.01	0.01	0.0923	0.1094
chromosome_16:2812817-2813131	N6	Cre16.g663150.v5.5	0.01	0.01	0.0774	0.01	0.1507	0.01	0.01	0.01	0.01	0.01	0.01	0.01	0.01	0.01	0.1104	0.01	0.0913	0.1515	0.0904	0.1685	0.01	0.1913	0.01	0.2445	0.299	0.3538	0.2119	0.3433
chromosome_16:2829163-2829255	N1	Cre16.g663315.v5.5	0.01	0.01	0.01	0.01	0.01	0.01	0.01	0.01	0.01	0.01	0.01	0.01	0.01	0.01	0.043	0.098	0.01	0.01	0.01	0.01	0.01	0.0847	0.0743	0.1217	0.0994	0.01	0.0578	0.01
chromosome_16:2943561-2943782	N1	Cre16.g664150.v5.5	0.01	0.01	0.01	0.01	0.01	0.01	0.01	0.01	0.01	0.01	0.01	0.01	0.01	0.01	0.01	0.01	0.01	0.01	0.01	0.01	0.01	0.0694	0.01	0.01	0.01	0.01	0.0306	0.01
chromosome_16:295911-296314	N1	Cre16.g694202.v5.5	0.01	0.01	0.01	0.01	0.01	0.01	0.01	0.01	0.01	0.01	0.01	0.01	0.01	0.01	0.01	0.01	0.0442	0.01	0.01	0.01	0.01	0.01	0.0619	0.01	0.01	0.01	0.01	0.01
chromosome_16:2959673-2959780	N1	Cre16.g664200.v5.5	0.01	0.01	0.01	0.01	0.01	0.01	0.01	0.01	0.01	0.01	0.01	0.01	0.01	0.01	0.01	0.01	0.01	0.01	0.01	0.01	0.01	0.01	0.01	0.0526	0.01	0.01	0.01	0.01
chromosome_16:2963757-2963847	N2	Cre16.g664250.v5.5	0.0641	0.01	0.1163	0.1368	0.01	0.1039	0.2	0.1354	0.0625	0.01	0.042	0.01	0.01	0.0619	0.0557	0.0645	0.0582	0.01	0.0724	0.01	0.0531	0.0537	0.0598	0.0337	0.0513	0.01	0.01	0.01
chromosome_16:3129223-3129432	N2	Cre16.g665700.v5.5	0.01	0.01	0.1429	0.1382	0.01	0.1765	0.1193	0.0993	0.1226	0.01	0.01	0.01	0.01	0.1304	0.0748	0.01	0.01	0.01	0.01	0.01	0.1314	0.01	0.01	0.01	0.0921	0.01	0.0554	0.1281
chromosome_16:3136990-3137136	N1	Cre16.g665800.v5.5	0.01	0.01	0.01	0.01	0.01	0.01	0.01	0.01	0.01	0.01	0.01	0.01	0.01	0.01	0.01	0.01	0.01	0.01	0.1053	0.01	0.0746	0.0672	0.01	0.0771	0.0366	0.031	0.0506	0.0587
chromosome_16:3176019-3176190	N1	Cre16.g666200.v5.5	0.01	0.01	0.01	0.01	0.01	0.01	0.01	0.01	0.0753	0.01	0.01	0.01	0.01	0.01	0.01	0.01	0.01	0.01	0.01	0.01	0.01	0.01	0.01	0.01	0.01	0.0148	0.01	0.0342
chromosome_16:3220596-3220921	N5	Cre16.g666550.v5.5	0.01	0.01	0.01	0.01	0.01	0.0492	0.01	0.01	0.01	0.01	0.01	0.01	0.01	0.0433	0.0399	0.0451	0.0678	0.0728	0.0616	0.0779	0.1045	0.0806	0.1382	0.1542	0.1057	0.1324	0.1194	0.0929
chromosome_16:3451448-3451671	N2	Cre16.g670617.v5.5	0.1231	0.01	0.1101	0.1337	0.01	0.2692	0.2024	0.01	0.01	0.01	0.01	0.01	0.01	0.01	0.105	0.01	0.0891	0.01	0.1463	0.084	0.01	0.01	0.2316	0.1303	0.1338	0.0932	0.1277	0.15
chromosome_16:3456685-3456830	N1	Cre16.g671329.v5.5	0.01	0.01	0.01	0.01	0.01	0.01	0.01	0.01	0.01	0.01	0.01	0.01	0.01	0.01	0.01	0.01	0.01	0.0652	0.01	0.01	0.01	0.01	0.01	0.01	0.01	0.01	0.01	0.01
chromosome_16:3461129-3461817	N5	Cre16.g672041.v5.5	0.1145	0.01	0.01	0.01	0.01	0.01	0.01	0.01	0.01	0.01	0.01	0.01	0.01	0.01	0.01	0.01	0.01	0.01	0.01	0.01	0.1692	0.1676	0.01	0.173	0.01	0.01	0.1993	0.01
chromosome_16:3461953-3462132	N6	Cre16.g672041.v5.5	0.01	0.01	0.1183	0.01	0.01	0.2727	0.01	0.01	0.2178	0.1818	0.0635	0.01	0.01	0.0881	0.0461	0.1131	0.1206	0.01	0.1333	0.1696	0.15	0.2	0.1623	0.1797	0.1527	0.01	0.1336	0.2701
chromosome_16:3472859-3472938	N6	Cre16.g672753.v5.5	0.01	0.01	0.01	0.137	0.01	0.1571	0.2	0.01	0.01	0.01	0.01	0.01	0.01	0.01	0.0567	0.1359	0.1685	0.1633	0.1577	0.2081	0.2326	0.1716	0.1607	0.2482	0.1735	0.2324	0.166	0.1478
chromosome_16:3481466-3481822	N5	Cre16.g673821.v5.5	0.0933	0.01	0.01	0.01	0.01	0.01	0.01	0.01	0.01	0.01	0.01	0.01	0.01	0.01	0.01	0.01	0.01	0.01	0.01	0.01	0.1505	0.01	0.1288	0.01	0.01	0.01	0.1459	0.1189
chromosome_16:3498063-3498142	N1	Cre16.g675246.v5.5	0.01	0.01	0.01	0.01	0.01	0.01	0.01	0.01	0.01	0.01	0.01	0.01	0.01	0.01	0.01	0.0655	0.01	0.01	0.01	0.01	0.01	0.01	0.01	0.01	0.01	0.01	0.01	0.01
chromosome_16:3533289-3533561	N1	Cre16.g678452.v5.5	0.01	0.01	0.01	0.01	0.01	0.01	0.01	0.01	0.01	0.01	0.01	0.01	0.01	0.01	0.01	0.01	0.01	0.01	0.01	0.01	0.01	0.01	0.01	0.01	0.01	0.01	0.01	0.071
chromosome_16:3547421-3547737	N1	Cre16.g679164.v5.5	0.01	0.01	0.01	0.01	0.01	0.01	0.01	0.01	0.01	0.01	0.01	0.01	0.01	0.01	0.01	0.01	0.01	0.01	0.01	0.01	0.01	0.01	0.01	0.01	0.01	0.01	0.0544	0.01
chromosome_16:3558392-3558548	N1	Cre16.g679876.v5.5	0.01	0.01	0.01	0.01	0.01	0.01	0.01	0.01	0.01	0.01	0.01	0.01	0.01	0.01	0.01	0.01	0.01	0.01	0.01	0.01	0.01	0.01	0.01	0.1084	0.01	0.1111	0.01	0.01
chromosome_16:3659722-3659964	N1	Cre16.g688550.v5.5	0.01	0.01	0.01	0.01	0.01	0.01	0.01	0.01	0.01	0.01	0.01	0.01	0.01	0.01	0.01	0.01	0.01	0.01	0.01	0.01	0.01	0.01	0.01	0.01	0.1099	0.0819	0.01	0.01
chromosome_16:3742855-3743058	N1	Cre16.g689100.v5.5	0.01	0.01	0.01	0.01	0.01	0.01	0.01	0.01	0.01	0.01	0.01	0.01	0.01	0.01	0.01	0.01	0.01	0.01	0.01	0.01	0.01	0.01	0.01	0.01	0.01	0.01	0.0712	0.01
chromosome_16:3900797-3901071	N1	Cre16.g690400.v5.5	0.0135	0.01	0.01	0.01	0.01	0.01	0.01	0.01	0.01	0.01	0.01	0.01	0.01	0.01	0.01	0.01	0.01	0.01	0.01	0.01	0.01	0.0698	0.01	0.0997	0.067	0.05	0.0803	0.01
chromosome_16:3907786-3908537	N1	Cre16.g690450.v5.5	0.01	0.01	0.01	0.01	0.01	0.01	0.01	0.01	0.01	0.01	0.01	0.01	0.01	0.01	0.01	0.01	0.01	0.01	0.01	0.01	0.01	0.01	0.01	0.01	0.01	0.01	0.0958	0.01
chromosome_16:397032-397199	N1	Cre16.g693500.v5.5	0.01	0.01	0.01	0.01	0.01	0.01	0.0369	0.0534	0.01	0.0874	0.0984	0.01	0.01	0.0911	0.1064	0.01	0.2131	0.01	0.01	0.01	0.01	0.01	0.1215	0.01	0.01	0.01	0.01	0.01
chromosome_16:41248-41420	N1	Cre16.g696000.v5.5	0.1022	0.01	0.01	0.01	0.01	0.01	0.01	0.01	0.01	0.01	0.01	0.01	0.01	0.01	0.01	0.01	0.01	0.01	0.01	0.01	0.01	0.01	0.01	0.01	0.01	0.01	0.01	0.01
chromosome_16:4134947-4135144	N1	Cre16.g669150.v5.5	0.01	0.01	0.01	0.01	0.01	0.01	0.01	0.01	0.01	0.01	0.01	0.01	0.01	0.01	0.01	0.01	0.01	0.01	0.01	0.01	0.1509	0.01	0.01	0.01	0.01	0.01	0.105	0.01
chromosome_16:4175370-4175710	N1	Cre16.g668800.v5.5	0.01	0.01	0.01	0.01	0.01	0.01	0.01	0.01	0.01	0.01	0.01	0.01	0.01	0.01	0.01	0.01	0.01	0.01	0.0623	0.01	0.01	0.0651	0.01	0.01	0.01	0.01	0.0333	0.01
chromosome_16:4280540-4281077	N1	Cre16.g668100.v5.5	0.0882	0.01	0.01	0.01	0.01	0.01	0.01	0.01	0.01	0.01	0.01	0.01	0.01	0.01	0.01	0.01	0.01	0.01	0.01	0.01	0.01	0.01	0.01	0.01	0.01	0.01	0.01	0.01
chromosome_16:431558-431657	N1	Cre16.g693202.v5.5	0.01	0.01	0.01	0.01	0.01	0.01	0.01	0.01	0.01	0.01	0.01	0.01	0.01	0.01	0.01	0.01	0.01	0.01	0.01	0.01	0.01	0.01	0.01	0.01	0.01	0.01	0.0559	0.01
chromosome_16:4481873-4482028	N1	Cre16.g667450.v5.5	0.01	0.01	0.01	0.01	0.01	0.01	0.01	0.1037	0.01	0.01	0.01	0.01	0.01	0.01	0.01	0.01	0.01	0.01	0.01	0.01	0.01	0.01	0.01	0.01	0.01	0.01	0.01	0.01
chromosome_16:4608617-4609012	N1	Cre16.g687750.v5.5	0.01	0.01	0.01	0.01	0.01	0.01	0.01	0.01	0.01	0.01	0.01	0.01	0.01	0.01	0.01	0.01	0.01	0.01	0.01	0.01	0.01	0.01	0.01	0.01	0.01	0.01	0.1176	0.01
chromosome_16:4610056-4610208	N1	Cre16.g687750.v5.5	0.01	0.01	0.01	0.01	0.01	0.01	0.01	0.01	0.01	0.01	0.01	0.01	0.01	0.01	0.01	0.01	0.01	0.01	0.01	0.01	0.01	0.01	0.01	0.01	0.01	0.01	0.0821	0.01
chromosome_16:4610225-4610370	N5	Cre16.g687750.v5.5	0.01	0.01	0.01	0.01	0.01	0.01	0.01	0.01	0.01	0.01	0.01	0.01	0.01	0.01	0.01	0.01	0.01	0.01	0.01	0.01	0.1711	0.01	0.01	0.1081	0.2105	0.1375	0.1292	0.01
chromosome_16:4771480-4771766	N1	Cre16.g686550.v5.5	0.01	0.01	0.01	0.01	0.01	0.01	0.01	0.01	0.01	0.01	0.01	0.01	0.01	0.01	0.01	0.01	0.01	0.01	0.01	0.01	0.01	0.01	0.01	0.0971	0.01	0.01	0.01	0.01
chromosome_16:4867919-4868001	N6	Cre16.g686000.v5.5	0.119	0.25	0.3684	0.01	0.2245	0.35	0.2955	0.01	0.2105	0.2727	0.01	0.01	0.01	0.01	0.1127	0.1167	0.1244	0.01	0.1282	0.1803	0.2637	0.2308	0.2039	0.2963	0.1714	0.252	0.2421	0.2471
chromosome_16:4899766-4900060	N5	Cre16.g685750.v5.5	0.01	0.01	0.01	0.01	0.01	0.01	0.1149	0.01	0.01	0.01	0.01	0.01	0.01	0.01	0.01	0.01	0.01	0.01	0.01	0.01	0.01	0.01	0.1101	0.1158	0.1151	0.1189	0.2324	0.1071
chromosome_16:4974863-4975041	N1	Cre16.g685250.v5.5	0.01	0.01	0.01	0.01	0.01	0.01	0.01	0.01	0.01	0.01	0.01	0.01	0.01	0.01	0.01	0.01	0.01	0.01	0.01	0.01	0.01	0.0602	0.01	0.01	0.01	0.01	0.0566	0.01
chromosome_16:5007953-5008140	N1	Cre16.g684850.v5.5	0.01	0.01	0.01	0.01	0.01	0.01	0.01	0.01	0.01	0.01	0.01	0.0769	0.01	0.01	0.01	0.01	0.01	0.01	0.01	0.01	0.01	0.01	0.01	0.01	0.01	0.01	0.01	0.01
chromosome_16:5025075-5025280	N1	Cre16.g684650.v5.5	0.0183	0.01	0.01	0.01	0.01	0.01	0.0403	0.0334	0.0726	0.01	0.01	0.01	0.01	0.01	0.0165	0.01	0.01	0.01	0.01	0.01	0.01	0.01	0.01	0.01	0.01	0.01	0.01	0.0151
chromosome_16:5134117-5134347	N1	Cre16.g683700.v5.5	0.01	0.01	0.01	0.01	0.01	0.01	0.01	0.01	0.01	0.01	0.01	0.01	0.01	0.01	0.01	0.01	0.01	0.01	0.01	0.01	0.0524	0.01	0.01	0.01	0.01	0.01	0.01	0.01
chromosome_16:5307996-5308264	N1	Cre16.g682350.v5.5	0.01	0.01	0.01	0.01	0.01	0.01	0.01	0.01	0.01	0.0719	0.089	0.01	0.01	0.01	0.01	0.01	0.01	0.01	0.01	0.01	0.01	0.01	0.01	0.01	0.01	0.01	0.01	0.01
chromosome_16:5459616-5460035	N2	Cre16.g680950.v5.5	0.01	0.01	0.375	0.01	0.3704	0.01	0.5208	0.4694	0.01	0.01	0.01	0.01	0.01	0.01	0.01	0.01	0.01	0.01	0.01	0.1026	0.1	0.01	0.01	0.01	0.01	0.08	0.09	0.1298
chromosome_16:563668-563988	N7	Cre16.g692450.v5.5	0.2778	0.01	0.383	0.01	0.01	0.36	0.2586	0.329	0.4024	0.2059	0.2339	0.231	0.1807	0.1807	0.1667	0.223	0.3281	0.3375	0.2648	0.3256	0.4375	0.3636	0.4296	0.4688	0.4745	0.4	0.435	0.408
chromosome_16:5778380-5778473	N1	Cre16.g678450.v5.5	0.01	0.01	0.01	0.01	0.01	0.01	0.01	0.01	0.01	0.01	0.01	0.2066	0.01	0.01	0.0594	0.01	0.01	0.01	0.01	0.01	0.01	0.01	0.01	0.01	0.01	0.01	0.01	0.01
chromosome_16:5807859-5808255	N1	Cre16.g678100.v5.5	0.01	0.01	0.01	0.01	0.01	0.01	0.01	0.01	0.01	0.01	0.01	0.01	0.0369	0.01	0.01	0.01	0.01	0.01	0.0648	0.01	0.01	0.1081	0.01	0.01	0.01	0.0988	0.0759	0.01
chromosome_16:6107421-6107708	N1	Cre16.g675850.v5.5	0.01	0.01	0.01	0.01	0.01	0.01	0.01	0.01	0.01	0.01	0.01	0.01	0.01	0.01	0.01	0.01	0.01	0.01	0.01	0.01	0.01	0.01	0.01	0.1831	0.01	0.01	0.01	0.01
chromosome_16:6627617-6627817	N1	Cre16.g671900.v5.5	0.01	0.01	0.01	0.01	0.01	0.0594	0.0546	0.0245	0.0228	0.0105	0.0128	0.0104	0.0144	0.0107	0.0075	0.01	0.01	0.01	0.01	0.01	0.01	0.01	0.01	0.01	0.01	0.01	0.01	0.01
chromosome_16:687694-688321	N1	Cre16.g691450.v5.5	0.01	0.01	0.01	0.01	0.01	0.0317	0.01	0.01	0.01	0.01	0.01	0.01	0.01	0.01	0.01	0.01	0.01	0.01	0.01	0.01	0.01	0.01	0.01	0.01	0.01	0.0372	0.065	0.01
chromosome_16:7023772-7024076	N1	Cre16.g678213.v5.5	0.01	0.01	0.01	0.01	0.01	0.01	0.01	0.01	0.01	0.01	0.01	0.01	0.01	0.01	0.01	0.01	0.01	0.01	0.01	0.01	0.01	0.01	0.0524	0.01	0.01	0.01	0.01	0.01
chromosome_16:7048018-7048189	N5	Cre16.g678773.v5.5	0.01	0.01	0.01	0.01	0.01	0.01	0.01	0.01	0.01	0.01	0.01	0.01	0.01	0.01	0.1214	0.1768	0.1271	0.01	0.0872	0.133	0.1685	0.1419	0.1823	0.01	0.1286	0.01	0.1699	0.2202
chromosome_16:704806-704944	N6	Cre16.g691350.v5.5	0.01	0.01	0.01	0.01	0.01	0.01	0.01	0.01	0.01	0.3077	0.01	0.01	0.01	0.01	0.1918	0.01	0.2308	0.2	0.2096	0.1651	0.2929	0.1802	0.1545	0.2705	0.05	0.1333	0.1453	0.1341
chromosome_16:704967-705138	N6	Cre16.g691350.v5.5	0.01	0.01	0.01	0.01	0.01	0.01	0.01	0.01	0.01	0.01	0.01	0.01	0.01	0.01	0.1852	0.2308	0.1825	0.2143	0.2069	0.1748	0.2717	0.1456	0.1909	0.2917	0.01	0.01	0.1405	0.1348
chromosome_16:7096663-7096909	N1	Cre16.g679781.v5.5	0.01	0.01	0.01	0.01	0.01	0.01	0.01	0.01	0.01	0.01	0.01	0.01	0.01	0.01	0.01	0.01	0.01	0.01	0.051	0.01	0.01	0.01	0.01	0.01	0.01	0.01	0.01	0.01
chromosome_16:7101658-7101783	N1	Cre16.g679893.v5.5	0.01	0.01	0.01	0.01	0.01	0.01	0.01	0.01	0.01	0.01	0.01	0.01	0.01	0.01	0.01	0.01	0.078	0.01	0.01	0.01	0.0877	0.0833	0.1583	0.0863	0.01	0.01	0.01	0.0756
chromosome_16:7110625-7110818	N1	Cre16.g680117.v5.5	0.01	0.01	0.01	0.01	0.01	0.01	0.01	0.01	0.01	0.01	0.01	0.01	0.01	0.01	0.01	0.01	0.01	0.01	0.01	0.01	0.0704	0.01	0.01	0.01	0.01	0.01	0.01	0.01
chromosome_16:7379137-7379239	N1	Cre16.g685165.v5.5	0.01	0.01	0.01	0.01	0.01	0.01	0.01	0.01	0.01	0.01	0.01	0.01	0.01	0.01	0.01	0.01	0.01	0.01	0.01	0.01	0.01	0.01	0.01	0.2222	0.01	0.01	0.01	0.01
chromosome_16:7421972-7422480	N1	Cre16.g686173.v5.5	0.01	0.01	0.01	0.01	0.01	0.01	0.01	0.01	0.01	0.01	0.01	0.01	0.01	0.01	0.01	0.01	0.01	0.01	0.01	0.01	0.01	0.01	0.01	0.0942	0.01	0.01	0.01	0.01
chromosome_16:7623011-7623081	N1	Cre16.g689647.v5.5	0.01	0.01	0.01	0.01	0.01	0.01	0.01	0.01	0.01	0.01	0.01	0.01	0.01	0.01	0.01	0.01	0.01	0.01	0.01	0.01	0.01	0.1441	0.01	0.1012	0.0791	0.01	0.1292	0.01
chromosome_16:7746555-7746993	N1	Cre16.g691888.v5.5	0.01	0.01	0.01	0.01	0.01	0.01	0.01	0.01	0.01	0.01	0.01	0.01	0.01	0.01	0.01	0.01	0.01	0.01	0.01	0.01	0.01	0.01	0.0707	0.0724	0.01	0.01	0.1111	0.01
chromosome_16:7747033-7747147	N5	Cre16.g691888.v5.5	0.01	0.01	0.01	0.01	0.01	0.01	0.01	0.0889	0.01	0.01	0.01	0.01	0.01	0.01	0.0231	0.01	0.01	0.01	0.01	0.0519	0.0441	0.0849	0.1337	0.0866	0.0597	0.0807	0.1154	0.01
chromosome_16:7747209-7747435	N5	Cre16.g691888.v5.5	0.01	0.01	0.01	0.01	0.01	0.1626	0.01	0.1356	0.01	0.01	0.01	0.01	0.01	0.01	0.01	0.1067	0.0508	0.01	0.0573	0.1186	0.094	0.01	0.1111	0.1058	0.1111	0.01	0.0881	0.01
chromosome_16:7758999-7759139	N7	Cre16.g692116.v5.5	0.01	0.01	0.01	0.01	0.01	0.2985	0.3548	0.4146	0.3544	0.2436	0.2907	0.01	0.01	0.4179	0.4444	0.314	0.3175	0.01	0.5281	0.4079	0.463	0.4348	0.5591	0.3333	0.2955	0.4667	0.4085	0.404
chromosome_16:7771322-7771486	N1	Cre16.g692228.v5.5	0.01	0.01	0.01	0.01	0.01	0.1313	0.01	0.01	0.01	0.1024	0.01	0.01	0.01	0.01	0.01	0.01	0.01	0.01	0.01	0.01	0.01	0.01	0.01	0.01	0.01	0.01	0.0329	0.0459
chromosome_16:867176-867396	N1	Cre16.g648000.v5.5	0.01	0.01	0.01	0.01	0.01	0.01	0.01	0.01	0.01	0.01	0.01	0.01	0.01	0.01	0.0375	0.01	0.01	0.01	0.01	0.01	0.01	0.01	0.01	0.0625	0.01	0.01	0.01	0.01
chromosome_16:868931-869197	N1	Cre16.g648000.v5.5	0.01	0.01	0.01	0.01	0.01	0.01	0.01	0.01	0.01	0.01	0.01	0.01	0.01	0.01	0.01	0.01	0.01	0.01	0.01	0.01	0.0977	0.01	0.136	0.01	0.0709	0.01	0.01	0.01
chromosome_17:1169296-1169497	N5	Cre17.g704550.v5.5	0.01	0.01	0.01	0.01	0.01	0.01	0.01	0.01	0.01	0.01	0.01	0.01	0.01	0.01	0.01	0.01	0.01	0.01	0.01	0.01	0.01	0.233	0.01	0.01	0.01	0.3509	0.3766	0.01
chromosome_17:1169568-1170100	N6	Cre17.g704550.v5.5	0.01	0.01	0.01	0.01	0.01	0.01	0.01	0.01	0.01	0.01	0.01	0.01	0.01	0.01	0.01	0.01	0.01	0.01	0.01	0.01	0.1807	0.2533	0.01	0.2484	0.2708	0.4713	0.3221	0.4643
chromosome_17:1192884-1193125	N3	Cre17.g704850.v5.5	0.0163	0.0446	0.0583	0.0756	0.1383	0.1081	0.1244	0.1215	0.1551	0.2007	0.1855	0.2108	0.2049	0.3962	0.4353	0.4561	0.348	0.2986	0.2167	0.2542	0.2465	0.2238	0.2386	0.1954	0.2013	0.2101	0.2244	0.1574
chromosome_17:1323595-1323862	N1	Cre17.g705900.v5.5	0.01	0.01	0.01	0.01	0.01	0.01	0.01	0.01	0.01	0.01	0.01	0.01	0.01	0.01	0.01	0.01	0.01	0.01	0.01	0.01	0.01	0.01	0.0723	0.01	0.01	0.01	0.01	0.01
chromosome_17:1552970-1553163	N1	Cre17.g707500.v5.5	0.01	0.01	0.01	0.01	0.01	0.01	0.1013	0.01	0.01	0.01	0.01	0.2429	0.01	0.01	0.0943	0.01	0.16	0.01	0.01	0.01	0.3125	0.01	0.01	0.01	0.01	0.01	0.01	0.01
chromosome_17:1600992-1601272	N1	Cre17.g707800.v5.5	0.01	0.01	0.01	0.01	0.01	0.01	0.01	0.01	0.01	0.01	0.01	0.01	0.01	0.01	0.01	0.01	0.01	0.01	0.01	0.01	0.01	0.01	0.1351	0.01	0.01	0.01	0.0519	0.01
chromosome_17:1658257-1658404	N1	Cre17.g708250.v5.5	0.01	0.01	0.01	0.01	0.01	0.01	0.01	0.01	0.01	0.01	0.01	0.01	0.01	0.01	0.01	0.01	0.01	0.01	0.0202	0.0258	0.0716	0.01	0.0443	0.0685	0.01	0.01	0.0236	0.01
chromosome_17:1966177-1966293	N2	Cre17.g710881.v5.5	0.3	0.01	0.2692	0.01	0.01	0.2917	0.3019	0.1591	0.01	0.01	0.01	0.01	0.01	0.01	0.1128	0.01	0.0653	0.01	0.01	0.01	0.01	0.0687	0.01	0.01	0.169	0.0836	0.0531	0.0409
chromosome_17:2170711-2170929	N1	Cre17.g713000.v5.5	0.01	0.01	0.01	0.01	0.01	0.01	0.01	0.01	0.01	0.01	0.01	0.01	0.01	0.01	0.01	0.01	0.0755	0.01	0.01	0.01	0.01	0.01	0.0658	0.01	0.01	0.01	0.01	0.01
chromosome_17:2171527-2171710	N5	Cre17.g713000.v5.5	0.01	0.01	0.01	0.01	0.01	0.01	0.01	0.01	0.01	0.01	0.01	0.01	0.01	0.01	0.01	0.186	0.1466	0.01	0.01	0.01	0.01	0.2208	0.2143	0.3371	0.1692	0.01	0.2414	0.01
chromosome_17:2216766-2216997	N1	Cre17.g713350.v5.5	0.01	0.01	0.01	0.0368	0.0658	0.01	0.01	0.0158	0.01	0.01	0.01	0.01	0.01	0.01	0.01	0.01	0.01	0.01	0.01	0.01	0.01	0.01	0.01	0.01	0.01	0.01	0.01	0.01
chromosome_17:2289633-2289733	N1	Cre17.g713850.v5.5	0.01	0.01	0.01	0.01	0.01	0.01	0.01	0.01	0.01	0.01	0.01	0.01	0.01	0.01	0.01	0.01	0.01	0.01	0.0632	0.01	0.01	0.01	0.0433	0.0275	0.01	0.01	0.01	0.01
chromosome_17:2736341-2736554	N7	Cre17.g718200.v5.5	0.01	0.2192	0.284	0.2936	0.3816	0.457	0.3713	0.4279	0.4375	0.4909	0.3811	0.442	0.4315	0.3432	0.3176	0.2632	0.3333	0.331	0.2834	0.3801	0.2874	0.2626	0.2038	0.2727	0.1646	0.3057	0.1389	0.1844
chromosome_17:2820123-2820782	N5	Cre17.g719000.v5.5	0.01	0.01	0.01	0.01	0.01	0.0276	0.01	0.028	0.0256	0.0178	0.012	0.01	0.012	0.0116	0.0103	0.0227	0.0325	0.0367	0.059	0.0512	0.0708	0.0669	0.0843	0.0928	0.035	0.01	0.0733	0.0886
chromosome_17:3100076-3100185	N1	Cre17.g721150.v5.5	0.01	0.01	0.01	0.01	0.01	0.01	0.01	0.01	0.01	0.01	0.01	0.01	0.01	0.01	0.01	0.01	0.01	0.01	0.01	0.01	0.01	0.01	0.01	0.01	0.0621	0.0418	0.01	0.01
chromosome_17:3196874-3197059	N6	Cre17.g722100.v5.5	0.01	0.01	0.01	0.01	0.01	0.01	0.01	0.2439	0.175	0.01	0.1429	0.01	0.01	0.2614	0.1457	0.2697	0.2174	0.3256	0.3119	0.3393	0.3125	0.3304	0.3604	0.3297	0.2741	0.1643	0.2542	0.354
chromosome_17:3202418-3202596	N1	Cre17.g722150.v5.5	0.01	0.01	0.01	0.01	0.01	0.01	0.01	0.01	0.01	0.01	0.01	0.01	0.01	0.01	0.01	0.01	0.01	0.01	0.01	0.01	0.01	0.01	0.01	0.01	0.1303	0.0887	0.01	0.01
chromosome_17:3202750-3202960	N1	Cre17.g722150.v5.5	0.01	0.01	0.01	0.01	0.01	0.01	0.01	0.01	0.01	0.01	0.01	0.01	0.01	0.01	0.01	0.01	0.01	0.01	0.01	0.01	0.01	0.01	0.01	0.01	0.0607	0.0436	0.01	0.01
chromosome_17:3204440-3205404	N5	Cre17.g722150.v5.5	0.01	0.01	0.01	0.01	0.01	0.01	0.01	0.01	0.01	0.01	0.01	0.01	0.01	0.01	0.01	0.01	0.0398	0.01	0.01	0.01	0.01	0.01	0.01	0.1245	0.3351	0.2811	0.2532	0.01
chromosome_17:3219534-3219646	N1	Cre17.g722350.v5.5	0.01	0.01	0.01	0.01	0.01	0.01	0.0622	0.01	0.0591	0.01	0.01	0.0168	0.01	0.01	0.01	0.0237	0.0154	0.01	0.01	0.0304	0.01	0.01	0.0336	0.01	0.01	0.01	0.01	0.01
chromosome_17:3232715-3232837	N1	Cre17.g722583.v5.5	0.01	0.01	0.01	0.01	0.01	0.01	0.01	0.01	0.01	0.01	0.01	0.01	0.01	0.01	0.01	0.01	0.01	0.01	0.01	0.01	0.01	0.0541	0.01	0.01	0.01	0.01	0.01	0.01
chromosome_17:3360755-3361124	N1	Cre17.g723550.v5.5	0.01	0.01	0.01	0.01	0.01	0.01	0.01	0.01	0.01	0.01	0.01	0.01	0.01	0.01	0.01	0.01	0.01	0.01	0.01	0.01	0.01	0.01	0.0714	0.0488	0.01	0.01	0.01	0.01
chromosome_17:3378914-3379047	N5	Cre17.g723750.v5.5	0.01	0.01	0.01	0.01	0.01	0.01	0.0753	0.0665	0.01	0.01	0.0205	0.01	0.01	0.01	0.005	0.0131	0.0144	0.01	0.0177	0.021	0.0266	0.01	0.0582	0.0328	0.0909	0.1075	0.1589	0.1181
chromosome_17:3379121-3379221	N1	Cre17.g723750.v5.5	0.01	0.01	0.01	0.01	0.01	0.01	0.01	0.0799	0.01	0.01	0.01	0.01	0.0067	0.01	0.01	0.01	0.01	0.01	0.01	0.01	0.01	0.01	0.01	0.0279	0.0565	0.0536	0.01	0.01
chromosome_17:3417261-3417396	N5	Cre17.g724250.v5.5	0.01	0.01	0.1141	0.01	0.01	0.0789	0.0568	0.0843	0.01	0.0614	0.01	0.131	0.01	0.116	0.1127	0.0767	0.147	0.1012	0.0932	0.1082	0.0867	0.0706	0.01	0.0631	0.0619	0.0616	0.0736	0.079
chromosome_17:3536856-3537388	N7	Cre17.g725301.v5.5	0.01	0.01	0.0625	0.1404	0.01	0.1618	0.1512	0.1709	0.1059	0.0649	0.0634	0.01	0.0667	0.1521	0.3058	0.2866	0.2957	0.3224	0.3061	0.2939	0.332	0.4464	0.3975	0.3894	0.3359	0.2633	0.3195	0.3051
chromosome_17:3537563-3537755	N6	Cre17.g725301.v5.5	0.0128	0.01	0.0252	0.0623	0.0657	0.0739	0.0875	0.0729	0.0653	0.0418	0.0344	0.01	0.0168	0.0967	0.133	0.1833	0.2104	0.0892	0.1194	0.1344	0.1624	0.1871	0.1916	0.1948	0.1303	0.0957	0.1505	0.1011
chromosome_17:3540994-3541224	N1	Cre17.g725350.v5.5	0.01	0.01	0.01	0.01	0.01	0.2152	0.01	0.01	0.01	0.01	0.01	0.01	0.01	0.01	0.01	0.01	0.01	0.01	0.01	0.01	0.01	0.01	0.01	0.01	0.01	0.01	0.01	0.01
chromosome_17:394354-394794	N5	Cre17.g698750.v5.5	0.01	0.01	0.01	0.01	0.01	0.01	0.01	0.01	0.01	0.01	0.01	0.01	0.01	0.01	0.01	0.01	0.01	0.01	0.01	0.01	0.01	0.01	0.01	0.01	0.01	0.01	0.3871	0.01
chromosome_17:4170483-4170786	N1	Cre17.g729950.v5.5	0.01	0.01	0.01	0.01	0.01	0.01	0.01	0.01	0.01	0.01	0.01	0.01	0.01	0.01	0.01	0.01	0.01	0.01	0.01	0.01	0.01	0.01	0.01	0.01	0.01	0.0992	0.01	0.01
chromosome_17:4170879-4171140	N1	Cre17.g729950.v5.5	0.01	0.01	0.01	0.01	0.01	0.01	0.01	0.01	0.01	0.01	0.01	0.01	0.01	0.01	0.01	0.01	0.01	0.01	0.01	0.01	0.01	0.01	0.01	0.01	0.01	0.1172	0.01	0.01
chromosome_17:4226886-4226993	N5	Cre17.g730450.v5.5	0.1008	0.01	0.01	0.01	0.01	0.01	0.01	0.0704	0.01	0.01	0.01	0.01	0.0571	0.01	0.01	0.0545	0.0867	0.01	0.0985	0.1082	0.1559	0.08	0.067	0.1625	0.0521	0.0611	0.1476	0.1212
chromosome_17:4281810-4282113	N1	Cre17.g730750.v5.5	0.01	0.01	0.01	0.01	0.01	0.01	0.01	0.01	0.01	0.01	0.01	0.01	0.01	0.01	0.01	0.01	0.01	0.01	0.01	0.01	0.01	0.01	0.01	0.01	0.01	0.01	0.0529	0.01
chromosome_17:4453554-4453956	N1	Cre17.g732250.v5.5	0.01	0.01	0.01	0.01	0.01	0.01	0.01	0.01	0.01	0.01	0.01	0.01	0.01	0.01	0.01	0.01	0.01	0.01	0.01	0.01	0.01	0.01	0.01	0.01	0.01	0.01	0.01	0.0654
chromosome_17:4927651-4928108	N1	Cre17.g734548.v5.5	0.01	0.01	0.01	0.01	0.01	0.01	0.01	0.01	0.01	0.01	0.01	0.01	0.01	0.01	0.01	0.01	0.01	0.01	0.034	0.01	0.01	0.0385	0.01	0.01	0.061	0.0564	0.0451	0.01
chromosome_17:4937121-4937314	N1	Cre17.g734564.v5.5	0.0368	0.01	0.01	0.01	0.01	0.01	0.01	0.01	0.01	0.01	0.01	0.01	0.01	0.01	0.01	0.01	0.01	0.01	0.0506	0.01	0.01	0.0606	0.048	0.01	0.01	0.01	0.01	0.0486
chromosome_17:4944501-4944617	N1	Cre17.g734596.v5.5	0.0319	0.01	0.01	0.01	0.01	0.0889	0.01	0.0671	0.01	0.01	0.01	0.01	0.01	0.01	0.01	0.01	0.0237	0.01	0.01	0.01	0.01	0.01	0.01	0.01	0.01	0.01	0.01	0.01
chromosome_17:4963698-4963949	N1	Cre17.g734644.v5.5	0.01	0.01	0.01	0.01	0.01	0.01	0.01	0.01	0.01	0.01	0.01	0.01	0.01	0.01	0.01	0.01	0.01	0.01	0.01	0.01	0.01	0.01	0.01	0.0769	0.01	0.01	0.0519	0.01
chromosome_17:5444966-5445203	N1	Cre17.g737000.v5.5	0.01	0.01	0.01	0.01	0.01	0.01	0.01	0.01	0.01	0.01	0.01	0.01	0.01	0.01	0.01	0.01	0.022	0.01	0.01	0.01	0.01	0.0541	0.01	0.01	0.01	0.01	0.01	0.038
chromosome_17:5449071-5449227	N1	Cre17.g737050.v5.5	0.01	0.01	0.01	0.01	0.01	0.01	0.01	0.01	0.01	0.01	0.01	0.01	0.01	0.01	0.01	0.01	0.01	0.01	0.01	0.01	0.01	0.01	0.01	0.01	0.01	0.0957	0.01	0.01
chromosome_17:5449278-5449440	N1	Cre17.g737050.v5.5	0.01	0.01	0.01	0.01	0.01	0.01	0.01	0.01	0.01	0.01	0.01	0.01	0.01	0.01	0.01	0.01	0.01	0.01	0.01	0.01	0.01	0.01	0.01	0.01	0.01	0.1212	0.01	0.01
chromosome_17:6029631-6029774	N1	Cre17.g740900.v5.5	0.01	0.01	0.01	0.01	0.01	0.01	0.01	0.1034	0.01	0.01	0.01	0.01	0.01	0.01	0.01	0.01	0.01	0.01	0.01	0.01	0.01	0.01	0.01	0.01	0.01	0.01	0.01	0.01
chromosome_17:6041293-6041538	N1	Cre17.g741050.v5.5	0.01	0.01	0.01	0.01	0.01	0.01	0.01	0.01	0.01	0.01	0.01	0.01	0.01	0.01	0.01	0.01	0.01	0.01	0.01	0.01	0.01	0.01	0.01	0.01	0.1569	0.1212	0.01	0.01
chromosome_17:6042325-6042673	N1	Cre17.g741050.v5.5	0.01	0.01	0.01	0.01	0.01	0.01	0.01	0.01	0.01	0.01	0.01	0.01	0.01	0.01	0.01	0.01	0.01	0.01	0.01	0.01	0.01	0.01	0.01	0.01	0.073	0.01	0.01	0.01
chromosome_17:6042752-6043067	N1	Cre17.g741050.v5.5	0.01	0.01	0.01	0.01	0.01	0.01	0.01	0.01	0.01	0.01	0.01	0.01	0.01	0.01	0.01	0.01	0.01	0.01	0.01	0.01	0.01	0.01	0.01	0.01	0.01	0.0871	0.01	0.01
chromosome_17:6190327-6190488	N8	Cre17.g741850.v5.5	0.01	0.0322	0.0404	0.0672	0.1171	0.0997	0.1317	0.084	0.0817	0.0388	0.0308	0.0266	0.0288	0.0336	0.1884	0.347	0.3427	0.4783	0.4261	0.4069	0.4886	0.4382	0.4793	0.4739	0.4019	0.3468	0.37	0.4383
chromosome_17:6200250-6200642	N5	Cre17.g741900.v5.5	0.01	0.01	0.01	0.01	0.01	0.01	0.01	0.01	0.01	0.01	0.01	0.01	0.01	0.01	0.01	0.01	0.01	0.01	0.01	0.01	0.01	0.01	0.01	0.1985	0.125	0.01	0.1609	0.01
chromosome_17:6247172-6247261	N1	Cre17.g742300.v5.5	0.01	0.01	0.01	0.01	0.01	0.01	0.01	0.01	0.01	0.01	0.01	0.01	0.01	0.01	0.01	0.01	0.01	0.01	0.01	0.01	0.01	0.01	0.01	0.01	0.01	0.01	0.0588	0.01
chromosome_17:6286370-6286514	N1	Cre17.g742600.v5.5	0.01	0.01	0.01	0.01	0.01	0.01	0.01	0.01	0.01	0.01	0.01	0.01	0.01	0.01	0.01	0.01	0.01	0.01	0.01	0.01	0.01	0.01	0.01	0.2192	0.01	0.01	0.01	0.01
chromosome_17:6291182-6291363	N6	Cre17.g742650.v5.5	0.01	0.01	0.119	0.01	0.01	0.1667	0.1923	0.1067	0.2323	0.01	0.1084	0.01	0.01	0.1029	0.1149	0.1769	0.1197	0.01	0.145	0.275	0.2348	0.2635	0.2348	0.2536	0.2	0.1073	0.1779	0.2152
chromosome_17:6826544-6826742	N1	Cre17.g745097.v5.5	0.01	0.01	0.01	0.01	0.01	0.01	0.01	0.01	0.01	0.01	0.01	0.01	0.01	0.01	0.01	0.01	0.01	0.01	0.01	0.01	0.01	0.01	0.01	0.01	0.0593	0.01	0.01	0.01
chromosome_17:6913897-6914112	N5	Cre17.g745847.v5.5	0.01	0.1296	0.0805	0.01	0.01	0.0679	0.0941	0.0386	0.048	0.01	0.01	0.01	0.0561	0.0663	0.0449	0.0374	0.059	0.01	0.0638	0.073	0.0981	0.1373	0.157	0.1675	0.1235	0.136	0.1622	0.1713
chromosome_17:6914149-6914279	N6	Cre17.g745847.v5.5	0.2384	0.1809	0.1634	0.1971	0.2148	0.2035	0.1902	0.1365	0.211	0.2165	0.214	0.1788	0.1591	0.1443	0.1078	0.0951	0.1434	0.1486	0.1538	0.2071	0.1266	0.2406	0.2628	0.2822	0.2365	0.2165	0.2886	0.285
chromosome_17:7019100-7019498	N1	Cre17.g746597.v5.5	0.01	0.01	0.01	0.01	0.01	0.01	0.01	0.01	0.01	0.01	0.01	0.01	0.01	0.01	0.01	0.01	0.01	0.01	0.01	0.01	0.01	0.01	0.01	0.01	0.01	0.0847	0.0742	0.01
chromosome_17:7019555-7020102	N5	Cre17.g746597.v5.5	0.01	0.01	0.01	0.01	0.01	0.01	0.01	0.01	0.01	0.01	0.01	0.01	0.01	0.01	0.01	0.01	0.01	0.01	0.0794	0.01	0.01	0.0994	0.01	0.1127	0.1225	0.01	0.1651	0.01
chromosome_17:7163656-7163797	N2	Cre17.g747897.v5.5	0.01	0.01	0.3208	0.202	0.2368	0.1458	0.1875	0.01	0.2	0.01	0.2167	0.01	0.146	0.1742	0.0767	0.1529	0.1264	0.0928	0.14	0.1496	0.2101	0.1824	0.1429	0.185	0.085	0.1172	0.1743	0.2277
chromosome_17:871130-871375	N1	Cre17.g702500.v5.5	0.01	0.01	0.0189	0.01	0.01	0.0394	0.0476	0.01	0.01	0.01	0.01	0.01	0.01	0.01	0.01	0.01	0.01	0.01	0.01	0.01	0.0945	0.01	0.01	0.0962	0.01	0.01	0.0791	0.1326
chromosome_17:900986-901226	N1	Cre17.g702800.v5.5	0.01	0.01	0.01	0.01	0.01	0.01	0.01	0.01	0.01	0.01	0.01	0.01	0.01	0.01	0.01	0.01	0.01	0.01	0.01	0.01	0.01	0.01	0.01	0.01	0.01	0.01	0.0828	0.01
chromosome_2:1063439-1063701	N1	Cre02.g080750.v5.5	0.01	0.01	0.01	0.01	0.01	0.01	0.01	0.01	0.01	0.01	0.01	0.01	0.1017	0.01	0.0491	0.01	0.01	0.01	0.058	0.0674	0.01	0.0542	0.0977	0.0648	0.0508	0.0323	0.0618	0.0757
chromosome_2:1187275-1187503	N6	Cre02.g081950.v5.5	0.01	0.01	0.0351	0.01	0.01	0.01	0.0895	0.0879	0.1152	0.01	0.01	0.01	0.01	0.01	0.1367	0.1618	0.1489	0.01	0.2022	0.2439	0.01	0.2323	0.3421	0.3197	0.2538	0.1693	0.2625	0.3253
chromosome_2:1187521-1187751	N6	Cre02.g081950.v5.5	0.0319	0.01	0.0393	0.01	0.0642	0.0663	0.0951	0.0777	0.0722	0.0965	0.01	0.01	0.01	0.01	0.1264	0.1132	0.1407	0.01	0.1231	0.2209	0.2685	0.216	0.3011	0.2869	0.2256	0.1552	0.2168	0.2468
chromosome_2:1222820-1222955	N1	Cre02.g082250.v5.5	0.072	0.0995	0.0536	0.01	0.01	0.0664	0.0538	0.01	0.1124	0.1038	0.0407	0.01	0.0449	0.01	0.0991	0.0829	0.0454	0.0722	0.01	0.047	0.0952	0.01	0.01	0.01	0.01	0.104	0.01	0.01
chromosome_2:1255367-1255738	N1	Cre02.g082600.v5.5	0.01	0.01	0.01	0.01	0.01	0.01	0.01	0.01	0.01	0.01	0.01	0.01	0.01	0.01	0.01	0.01	0.0217	0.01	0.01	0.0914	0.01	0.01	0.01	0.0676	0.01	0.01	0.01	0.01
chromosome_2:1558733-1559776	N7	Cre02.g084750.v5.5	0.01	0.01	0.4151	0.01	0.01	0.2346	0.2067	0.25	0.2	0.2053	0.1036	0.01	0.1857	0.1567	0.1169	0.2	0.184	0.2667	0.2987	0.3614	0.3846	0.3427	0.3318	0.4015	0.3644	0.3346	0.3885	0.4027
chromosome_2:1569725-1569883	N5	Cre02.g084850.v5.5	0.01	0.01	0.01	0.01	0.01	0.01	0.01	0.01	0.01	0.01	0.01	0.01	0.01	0.01	0.1124	0.01	0.1429	0.2292	0.2055	0.01	0.1667	0.2353	0.01	0.2448	0.181	0.01	0.209	0.225
chromosome_2:1602429-1602586	N1	Cre02.g085100.v5.5	0.01	0.01	0.01	0.01	0.01	0.01	0.01	0.0821	0.01	0.01	0.01	0.01	0.01	0.01	0.0778	0.0872	0.0833	0.01	0.01	0.01	0.01	0.01	0.0663	0.0544	0.01	0.01	0.0339	0.0712
chromosome_2:1661707-1662141	N1	Cre02.g085650.v5.5	0.01	0.01	0.01	0.01	0.01	0.01	0.01	0.01	0.01	0.01	0.01	0.01	0.01	0.01	0.01	0.01	0.065	0.01	0.01	0.01	0.01	0.01	0.01	0.01	0.01	0.01	0.01	0.01
chromosome_2:1762586-1762772	N1	Cre02.g086600.v5.5	0.0945	0.01	0.0993	0.0626	0.01	0.0377	0.0556	0.0917	0.0389	0.01	0.0585	0.01	0.0476	0.0473	0.0302	0.0381	0.0195	0.0324	0.0436	0.053	0.0631	0.0537	0.0482	0.0546	0.0281	0.01	0.0323	0.0721
chromosome_2:1847149-1847348	N5	Cre02.g087300.v5.5	0.01	0.01	0.01	0.01	0.01	0.01	0.01	0.1618	0.01	0.125	0.01	0.01	0.01	0.1321	0.01	0.01	0.088	0.01	0.0777	0.092	0.1636	0.01	0.01	0.1421	0.01	0.01	0.1136	0.01
chromosome_2:2154987-2155466	N6	Cre02.g089350.v5.5	0.265	0.01	0.01	0.01	0.01	0.01	0.01	0.3929	0.01	0.3582	0.2404	0.01	0.1449	0.2903	0.1888	0.2117	0.292	0.2683	0.1627	0.2487	0.2835	0.3242	0.3206	0.3542	0.2906	0.2899	0.354	0.3224
chromosome_2:2155730-2155990	N1	Cre02.g089350.v5.5	0.01	0.01	0.01	0.01	0.01	0.01	0.01	0.01	0.01	0.01	0.01	0.01	0.01	0.01	0.01	0.01	0.01	0.01	0.01	0.01	0.01	0.01	0.1212	0.01	0.01	0.01	0.1174	0.01
chromosome_2:2542149-2542427	N5	Cre02.g092550.v5.5	0.0526	0.01	0.01	0.069	0.01	0.01	0.01	0.01	0.01	0.01	0.01	0.01	0.01	0.01	0.01	0.01	0.01	0.01	0.01	0.01	0.1618	0.1774	0.1182	0.01	0.01	0.1209	0.1098	0.01
chromosome_2:2560861-2560947	N5	Cre02.g092800.v5.5	0.01	0.01	0.01	0.01	0.01	0.2909	0.01	0.1846	0.01	0.01	0.01	0.01	0.01	0.01	0.01	0.01	0.0498	0.01	0.1111	0.01	0.01	0.01	0.01	0.1429	0.1235	0.01	0.0947	0.1864
chromosome_2:2683702-2683826	N1	Cre02.g093350.v5.5	0.01	0.01	0.01	0.01	0.01	0.01	0.01	0.01	0.01	0.01	0.01	0.01	0.01	0.01	0.01	0.01	0.01	0.01	0.0617	0.01	0.01	0.01	0.01	0.01	0.01	0.01	0.01	0.01
chromosome_2:2689122-2689231	N1	Cre02.g093450.v5.5	0.0551	0.01	0.0402	0.0378	0.0285	0.0302	0.0282	0.01	0.01	0.01	0.01	0.01	0.01	0.01	0.01	0.01	0.01	0.01	0.01	0.01	0.0546	0.01	0.01	0.0784	0.01	0.01	0.107	0.086
chromosome_2:2827204-2827344	N6	Cre02.g094600.v5.5	0.1972	0.01	0.01	0.01	0.01	0.01	0.01	0.01	0.01	0.01	0.3061	0.01	0.2826	0.2295	0.2521	0.3077	0.2117	0.2462	0.3087	0.2788	0.4286	0.2868	0.2344	0.2615	0.356	0.3237	0.2452	0.2161
chromosome_2:285073-285144	N1	Cre02.g075050.v5.5	0.01	0.01	0.01	0.01	0.01	0.01	0.01	0.01	0.01	0.01	0.01	0.01	0.01	0.01	0.0081	0.0172	0.0168	0.01	0.0144	0.02	0.0226	0.0455	0.0245	0.0397	0.0563	0.0498	0.0574	0.1121
chromosome_2:331233-331368	N2	Cre02.g075500.v5.5	0.01	0.3261	0.4872	0.01	0.4194	0.1856	0.01	0.01	0.01	0.01	0.01	0.01	0.01	0.01	0.01	0.01	0.01	0.01	0.01	0.01	0.0596	0.0556	0.01	0.01	0.01	0.01	0.01	0.01
chromosome_2:331718-332066	N2	Cre02.g075500.v5.5	0.1242	0.3973	0.3983	0.2926	0.2346	0.2982	0.01	0.081	0.01	0.01	0.01	0.01	0.01	0.01	0.01	0.01	0.0261	0.01	0.01	0.01	0.01	0.0807	0.01	0.01	0.01	0.01	0.01	0.01
chromosome_2:332109-333419	N1	Cre02.g075500.v5.5	0.01	0.01	0.2551	0.01	0.01	0.01	0.01	0.01	0.01	0.01	0.01	0.01	0.01	0.01	0.01	0.01	0.01	0.01	0.01	0.01	0.01	0.01	0.01	0.01	0.01	0.01	0.01	0.01
chromosome_2:3332440-3332687	N1	Cre02.g095091.v5.5	0.01	0.01	0.01	0.01	0.01	0.01	0.01	0.01	0.01	0.01	0.01	0.01	0.01	0.01	0.01	0.01	0.01	0.01	0.01	0.01	0.1194	0.0827	0.01	0.0502	0.01	0.01	0.01	0.01
chromosome_2:33734-33993	N5	Cre02.g073200.v5.5	0.01	0.01	0.01	0.01	0.01	0.01	0.01	0.1034	0.01	0.01	0.01	0.01	0.0618	0.01	0.01	0.0545	0.0912	0.01	0.0949	0.1461	0.1625	0.1265	0.2169	0.1799	0.0773	0.1111	0.159	0.1567
chromosome_2:3415264-3415364	N6	Cre02.g095110.v5.5	0.3425	0.01	0.01	0.01	0.01	0.01	0.01	0.1549	0.01	0.01	0.01	0.01	0.1919	0.1641	0.1259	0.1992	0.2	0.1616	0.202	0.2221	0.2043	0.1836	0.2326	0.2236	0.1907	0.203	0.01	0.2317
chromosome_2:3460161-3460242	N5	Cre02.g095117.v5.5	0.01	0.01	0.01	0.01	0.01	0.01	0.01	0.01	0.01	0.01	0.01	0.01	0.01	0.01	0.2532	0.01	0.01	0.01	0.01	0.01	0.01	0.1806	0.2329	0.1288	0.1075	0.01	0.1277	0.1512
chromosome_2:3461729-3461959	N1	Cre02.g095117.v5.5	0.1176	0.01	0.01	0.01	0.01	0.01	0.01	0.0909	0.01	0.01	0.01	0.01	0.1692	0.01	0.01	0.01	0.01	0.01	0.01	0.01	0.01	0.01	0.01	0.038	0.01	0.0403	0.01	0.01
chromosome_2:3691118-3691380	N1	Cre02.g095000.v5.5	0.01	0.01	0.01	0.01	0.01	0.0509	0.01	0.01	0.01	0.01	0.01	0.01	0.01	0.01	0.01	0.01	0.01	0.01	0.01	0.01	0.01	0.01	0.01	0.01	0.01	0.01	0.01	0.01
chromosome_2:3691397-3691562	N1	Cre02.g095000.v5.5	0.01	0.01	0.01	0.0397	0.01	0.0531	0.01	0.01	0.01	0.01	0.01	0.01	0.01	0.01	0.01	0.01	0.01	0.01	0.01	0.01	0.01	0.01	0.01	0.01	0.01	0.01	0.01	0.01
chromosome_2:3712429-3712701	N1	Cre02.g095200.v5.5	0.01	0.01	0.01	0.01	0.01	0.01	0.01	0.01	0.01	0.01	0.01	0.01	0.01	0.01	0.01	0.01	0.01	0.01	0.01	0.01	0.01	0.01	0.01	0.01	0.01	0.112	0.01	0.01
chromosome_2:371641-371739	N5	Cre02.g075800.v5.5	0.01	0.01	0.01	0.01	0.01	0.01	0.01	0.01	0.01	0.01	0.01	0.01	0.01	0.125	0.0735	0.0694	0.0735	0.072	0.0992	0.1075	0.1116	0.0826	0.1121	0.1316	0.0471	0.0562	0.1059	0.1591
chromosome_2:371928-372024	N1	Cre02.g075800.v5.5	0.01	0.01	0.01	0.01	0.01	0.01	0.01	0.01	0.01	0.01	0.01	0.01	0.01	0.01	0.0302	0.0347	0.0293	0.01	0.0368	0.0455	0.0344	0.0781	0.0466	0.0707	0.0379	0.0261	0.039	0.0494
chromosome_2:372057-372230	N1	Cre02.g075800.v5.5	0.01	0.01	0.01	0.0876	0.01	0.01	0.01	0.01	0.01	0.01	0.01	0.01	0.01	0.01	0.0266	0.0547	0.0574	0.01	0.0205	0.01	0.0369	0.0676	0.0418	0.0675	0.01	0.01	0.0377	0.0616
chromosome_2:372618-372717	N1	Cre02.g075800.v5.5	0.0878	0.01	0.01	0.01	0.01	0.01	0.01	0.01	0.01	0.01	0.01	0.01	0.01	0.01	0.01	0.01	0.01	0.01	0.01	0.0337	0.0465	0.01	0.01	0.01	0.01	0.01	0.0153	0.0528
chromosome_2:3849676-3849811	N2	Cre02.g095800.v5.5	0.01	0.01	0.01	0.01	0.01	0.3333	0.1889	0.2205	0.01	0.1728	0.2706	0.2417	0.1607	0.1528	0.1082	0.1159	0.1268	0.01	0.1111	0.2035	0.01	0.1278	0.1083	0.1611	0.01	0.01	0.1589	0.01
chromosome_2:3931036-3931199	N1	Cre02.g096500.v5.5	0.01	0.01	0.01	0.01	0.01	0.08	0.01	0.01	0.01	0.01	0.01	0.01	0.01	0.01	0.01	0.01	0.01	0.01	0.01	0.01	0.01	0.01	0.01	0.01	0.01	0.01	0.01	0.01
chromosome_2:3931555-3931691	N1	Cre02.g096500.v5.5	0.01	0.01	0.01	0.01	0.01	0.0873	0.01	0.01	0.01	0.01	0.01	0.01	0.01	0.01	0.01	0.01	0.01	0.01	0.01	0.01	0.01	0.1043	0.01	0.01	0.01	0.01	0.0737	0.01
chromosome_2:3932388-3932554	N1	Cre02.g096500.v5.5	0.1212	0.01	0.01	0.01	0.01	0.01	0.0824	0.01	0.1503	0.0874	0.0955	0.125	0.01	0.01	0.01	0.069	0.0913	0.12	0.0667	0.01	0.01	0.01	0.01	0.01	0.01	0.01	0.0534	0.01
chromosome_2:3954211-3954425	N1	Cre02.g096601.v5.5	0.01	0.01	0.01	0.01	0.01	0.01	0.01	0.01	0.01	0.01	0.01	0.01	0.01	0.01	0.01	0.0823	0.01	0.01	0.0918	0.01	0.01	0.01	0.1194	0.01	0.1223	0.01	0.0876	0.01
chromosome_2:3955496-3955671	N1	Cre02.g096601.v5.5	0.01	0.01	0.01	0.01	0.01	0.01	0.01	0.01	0.01	0.01	0.01	0.01	0.01	0.01	0.0558	0.01	0.01	0.01	0.01	0.1466	0.01	0.01	0.01	0.01	0.0634	0.01	0.01	0.01
chromosome_2:4067218-4067376	N7	Cre02.g097300.v5.5	0.6	0.6111	0.4737	0.4957	0.6216	0.5368	0.6421	0.6016	0.5625	0.5305	0.4753	0.3317	0.2805	0.2363	0.2509	0.1831	0.2287	0.2292	0.3333	0.2656	0.2967	0.3	0.3839	0.3779	0.4035	0.3182	0.4091	0.3671
chromosome_2:4067721-4067964	N5	Cre02.g097334.v5.5	0.01	0.01	0.01	0.01	0.01	0.01	0.01	0.01	0.01	0.01	0.01	0.01	0.01	0.01	0.663	0.01	0.7775	0.01	0.01	0.01	0.01	0.01	0.01	0.01	0.01	0.01	0.01	0.01
chromosome_2:4071995-4072128	N1	Cre02.g097450.v5.5	0.01	0.01	0.01	0.01	0.01	0.0543	0.01	0.01	0.01	0.01	0.01	0.01	0.01	0.01	0.01	0.01	0.01	0.01	0.049	0.01	0.0826	0.01	0.0545	0.01	0.01	0.01	0.038	0.0517
chromosome_2:4072241-4072472	N1	Cre02.g097450.v5.5	0.01	0.01	0.01	0.01	0.01	0.01	0.01	0.01	0.01	0.01	0.01	0.01	0.01	0.01	0.01	0.01	0.01	0.01	0.0512	0.0581	0.1218	0.01	0.1484	0.0751	0.0402	0.01	0.0652	0.01
chromosome_2:4731957-4732027	N5	Cre02.g102100.v5.5	0.01	0.01	0.01	0.01	0.01	0.01	0.01	0.01	0.01	0.01	0.01	0.01	0.01	0.01	0.1551	0.01	0.01	0.01	0.1667	0.01	0.1414	0.01	0.1061	0.0929	0.01	0.01	0.058	0.01
chromosome_2:48190-48490	N1	Cre02.g073400.v5.5	0.01	0.01	0.01	0.01	0.01	0.01	0.1392	0.1071	0.01	0.01	0.01	0.01	0.01	0.01	0.01	0.01	0.01	0.01	0.01	0.01	0.01	0.0943	0.01	0.01	0.01	0.01	0.1059	0.01
chromosome_2:4911075-4911214	N1	Cre02.g103550.v5.5	0.0373	0.01	0.0199	0.01	0.01	0.01	0.0212	0.027	0.01	0.0274	0.0193	0.0395	0.0337	0.0278	0.0371	0.0437	0.05	0.0427	0.0527	0.0502	0.0606	0.0563	0.0652	0.0571	0.044	0.0511	0.0616	0.0573
chromosome_2:492643-492792	N1	Cre02.g076850.v5.5	0.01	0.01	0.01	0.01	0.01	0.01	0.01	0.01	0.01	0.01	0.01	0.01	0.01	0.01	0.01	0.01	0.01	0.01	0.037	0.0546	0.01	0.01	0.01	0.01	0.01	0.01	0.01	0.01
chromosome_2:492852-493026	N5	Cre02.g076850.v5.5	0.01	0.01	0.01	0.01	0.01	0.01	0.099	0.1626	0.1122	0.01	0.0862	0.01	0.01	0.1579	0.0921	0.0682	0.1228	0.1504	0.01	0.2031	0.2517	0.1639	0.1111	0.1854	0.01	0.01	0.1196	0.2267
chromosome_2:5014952-5015137	N1	Cre02.g104250.v5.5	0.01	0.01	0.01	0.01	0.01	0.01	0.01	0.01	0.01	0.01	0.01	0.01	0.01	0.01	0.0769	0.01	0.01	0.01	0.01	0.01	0.01	0.01	0.01	0.01	0.01	0.01	0.1111	0.01
chromosome_2:5105729-5106017	N1	Cre02.g104951.v5.5	0.01	0.01	0.01	0.01	0.01	0.01	0.01	0.01	0.01	0.01	0.0541	0.01	0.01	0.1055	0.086	0.1274	0.01	0.01	0.01	0.01	0.01	0.01	0.01	0.01	0.01	0.01	0.01	0.01
chromosome_2:5127391-5127714	N1	Cre02.g105100.v5.5	0.01	0.01	0.01	0.01	0.01	0.0485	0.01	0.01	0.01	0.01	0.0505	0.01	0.01	0.01	0.01	0.01	0.01	0.01	0.01	0.01	0.01	0.01	0.01	0.01	0.01	0.01	0.01	0.01
chromosome_2:5129924-5130096	N1	Cre02.g105150.v5.5	0.01	0.01	0.01	0.01	0.01	0.01	0.01	0.01	0.01	0.01	0.01	0.01	0.01	0.01	0.01	0.01	0.01	0.01	0.05	0.01	0.0982	0.01	0.01	0.01	0.01	0.01	0.01	0.01
chromosome_2:51327-51667	N2	Cre02.g073400.v5.5	0.2	0.01	0.3043	0.2557	0.2895	0.2991	0.297	0.2357	0.2929	0.1771	0.1724	0.01	0.1584	0.01	0.1795	0.1957	0.1203	0.01	0.1863	0.2039	0.01	0.01	0.1683	0.01	0.183	0.236	0.196	0.181
chromosome_2:5321055-5321454	N1	Cre02.g106950.v5.5	0.01	0.01	0.01	0.01	0.01	0.01	0.01	0.01	0.01	0.01	0.01	0.01	0.01	0.01	0.01	0.01	0.01	0.01	0.01	0.01	0.01	0.01	0.01	0.01	0.01	0.1278	0.0894	0.1023
chromosome_2:5369958-5370135	N1	Cre02.g107150.v5.5	0.01	0.01	0.01	0.01	0.0156	0.0172	0.0201	0.0228	0.0167	0.015	0.015	0.0112	0.024	0.0205	0.0077	0.0089	0.0071	0.0097	0.0142	0.0138	0.0285	0.0474	0.0502	0.0543	0.0422	0.0365	0.0699	0.1054
chromosome_2:5465517-5466043	N1	Cre02.g107850.v5.5	0.0292	0.01	0.01	0.01	0.01	0.01	0.01	0.0974	0.01	0.01	0.01	0.01	0.01	0.01	0.01	0.01	0.034	0.01	0.01	0.01	0.01	0.01	0.01	0.01	0.107	0.1579	0.0526	0.0554
chromosome_2:5501702-5501902	N6	Cre02.g108250.v5.5	0.1892	0.01	0.3077	0.2266	0.01	0.01	0.2203	0.2041	0.1493	0.01	0.01	0.01	0.01	0.01	0.01	0.3191	0.2404	0.3043	0.3826	0.2838	0.2947	0.3667	0.01	0.2619	0.1867	0.1779	0.3039	0.2353
chromosome_2:5651422-5651697	N1	Cre02.g109600.v5.5	0.01	0.01	0.01	0.01	0.01	0.0622	0.01	0.0478	0.01	0.01	0.01	0.01	0.01	0.01	0.01	0.01	0.01	0.01	0.01	0.01	0.01	0.01	0.01	0.01	0.01	0.01	0.01	0.01
chromosome_2:5728334-5728451	N1	Cre02.g110200.v5.5	0.01	0.01	0.01	0.01	0.01	0.01	0.01	0.01	0.01	0.01	0.01	0.01	0.01	0.01	0.0833	0.01	0.01	0.01	0.01	0.01	0.01	0.01	0.01	0.01	0.01	0.01	0.01	0.01
chromosome_2:5731819-5732005	N5	Cre02.g110250.v5.5	0.01	0.01	0.0754	0.0407	0.0813	0.01	0.01	0.01	0.01	0.01	0.01	0.01	0.01	0.0216	0.0128	0.0184	0.0336	0.0471	0.054	0.048	0.0736	0.0733	0.0771	0.0843	0.0206	0.01	0.0551	0.1278
chromosome_2:5742560-5742810	N1	Cre02.g110350.v5.5	0.01	0.01	0.01	0.01	0.01	0.0882	0.0607	0.0286	0.01	0.01	0.0195	0.01	0.01	0.01	0.0023	0.01	0.01	0.0119	0.0093	0.01	0.01	0.0211	0.01	0.0206	0.01	0.074	0.024	0.01
chromosome_2:5763249-5763469	N1	Cre02.g110600.v5.5	0.0929	0.01	0.01	0.01	0.01	0.01	0.01	0.01	0.01	0.01	0.0625	0.01	0.01	0.102	0.0324	0.01	0.01	0.01	0.01	0.01	0.01	0.0505	0.0686	0.0794	0.01	0.0779	0.0413	0.0641
chromosome_2:5771419-5771577	N1	Cre02.g110650.v5.5	0.01	0.01	0.01	0.01	0.01	0.01	0.01	0.01	0.01	0.01	0.01	0.01	0.01	0.01	0.01	0.01	0.01	0.01	0.01	0.01	0.0606	0.01	0.01	0.01	0.01	0.01	0.01	0.01
chromosome_2:5805660-5805805	N1	Cre02.g110850.v5.5	0.01	0.01	0.01	0.01	0.01	0.01	0.01	0.01	0.01	0.01	0.01	0.01	0.01	0.01	0.01	0.01	0.01	0.01	0.01	0.01	0.01	0.01	0.01	0.01	0.01	0.01	0.01	0.0773
chromosome_2:5842629-5842909	N6	Cre02.g111150.v5.5	0.01	0.01	0.01	0.01	0.01	0.01	0.01	0.01	0.01	0.01	0.0597	0.01	0.01	0.0536	0.0808	0.1534	0.22	0.2614	0.1186	0.2329	0.3197	0.2903	0.3778	0.3535	0.2302	0.2533	0.2973	0.4157
chromosome_2:5842929-5843125	N6	Cre02.g111150.v5.5	0.01	0.01	0.01	0.01	0.01	0.01	0.01	0.01	0.01	0.01	0.01	0.01	0.01	0.0505	0.0385	0.093	0.1259	0.01	0.01	0.1656	0.2185	0.248	0.01	0.2821	0.1745	0.2099	0.2379	0.3371
chromosome_2:5859271-5859475	N2	Cre02.g111300.v5.5	0.01	0.01	0.01	0.0995	0.01	0.0859	0.1486	0.01	0.1462	0.1635	0.1056	0.01	0.1544	0.0598	0.096	0.0781	0.08	0.1408	0.118	0.1362	0.1455	0.1624	0.1678	0.1544	0.1163	0.1497	0.0826	0.1228
chromosome_2:5859819-5860143	N1	Cre02.g111300.v5.5	0.01	0.01	0.01	0.01	0.01	0.01	0.1207	0.01	0.01	0.01	0.01	0.01	0.01	0.01	0.032	0.0478	0.01	0.01	0.0436	0.01	0.01	0.01	0.01	0.0186	0.01	0.0612	0.01	0.01
chromosome_2:5960987-5961158	N1	Cre02.g112000.v5.5	0.01	0.01	0.01	0.01	0.01	0.01	0.01	0.01	0.01	0.01	0.01	0.01	0.01	0.01	0.01	0.01	0.01	0.01	0.01	0.01	0.01	0.01	0.01	0.0737	0.01	0.01	0.01	0.01
chromosome_2:5967158-5967364	N1	Cre02.g112050.v5.5	0.01	0.01	0.01	0.01	0.01	0.01	0.01	0.01	0.01	0.01	0.01	0.01	0.01	0.01	0.1603	0.01	0.1313	0.01	0.01	0.1176	0.01	0.01	0.01	0.01	0.01	0.01	0.01	0.01
chromosome_2:6324307-6324487	N1	Cre02.g115000.v5.5	0.01	0.01	0.01	0.01	0.01	0.01	0.01	0.01	0.01	0.01	0.01	0.01	0.01	0.01	0.01	0.01	0.01	0.01	0.01	0.01	0.01	0.01	0.01	0.01	0.01	0.01	0.0755	0.01
chromosome_2:6346896-6347068	N1	Cre02.g115300.v5.5	0.01	0.01	0.01	0.01	0.01	0.01	0.01	0.01	0.0909	0.01	0.01	0.01	0.01	0.01	0.01	0.01	0.01	0.01	0.01	0.01	0.01	0.01	0.01	0.01	0.01	0.01	0.1026	0.01
chromosome_2:6436011-6436259	N1	Cre02.g115800.v5.5	0.01	0.01	0.01	0.01	0.01	0.01	0.01	0.01	0.01	0.01	0.01	0.01	0.01	0.01	0.01	0.01	0.01	0.01	0.01	0.01	0.0198	0.01	0.01	0.01	0.01	0.0829	0.01	0.01
chromosome_2:6436354-6436511	N1	Cre02.g115800.v5.5	0.01	0.01	0.01	0.01	0.01	0.01	0.01	0.01	0.01	0.01	0.01	0.01	0.01	0.01	0.01	0.01	0.0347	0.01	0.01	0.01	0.01	0.01	0.01	0.01	0.13	0.1368	0.0406	0.01
chromosome_2:6436591-6436801	N1	Cre02.g115800.v5.5	0.01	0.01	0.01	0.01	0.01	0.01	0.01	0.01	0.01	0.01	0.01	0.01	0.01	0.01	0.01	0.01	0.01	0.01	0.01	0.01	0.01	0.01	0.01	0.01	0.051	0.0425	0.01	0.01
chromosome_2:6537164-6537419	N1	Cre02.g116800.v5.5	0.01	0.01	0.01	0.01	0.01	0.01	0.01	0.01	0.01	0.01	0.01	0.01	0.01	0.01	0.01	0.01	0.01	0.01	0.01	0.01	0.01	0.01	0.01	0.01	0.5556	0.01	0.01	0.01
chromosome_2:695080-695172	N1	Cre02.g078200.v5.5	0.01	0.01	0.01	0.01	0.01	0.01	0.01	0.01	0.01	0.01	0.01	0.01	0.01	0.01	0.01	0.01	0.01	0.01	0.01	0.01	0.01	0.01	0.01	0.0561	0.01	0.01	0.0305	0.01
chromosome_2:7042797-7043005	N1	Cre02.g147450.v5.5	0.01	0.01	0.01	0.01	0.01	0.01	0.1443	0.01	0.01	0.01	0.01	0.01	0.01	0.01	0.01	0.01	0.01	0.01	0.01	0.01	0.01	0.01	0.01	0.01	0.01	0.01	0.01	0.01
chromosome_2:7121034-7121403	N1	Cre02.g146700.v5.5	0.01	0.01	0.01	0.01	0.01	0.01	0.01	0.0325	0.01	0.01	0.01	0.01	0.01	0.01	0.0168	0.01	0.01	0.01	0.0215	0.01	0.01	0.01	0.01	0.01	0.01	0.01	0.0634	0.01
chromosome_2:7126701-7126919	N1	Cre02.g146650.v5.5	0.01	0.01	0.01	0.01	0.01	0.01	0.01	0.01	0.01	0.01	0.01	0.01	0.01	0.01	0.01	0.01	0.01	0.01	0.01	0.01	0.01	0.01	0.01	0.01	0.01	0.0503	0.01	0.01
chromosome_2:7145586-7145804	N1	Cre02.g146550.v5.5	0.01	0.01	0.01	0.01	0.01	0.01	0.01	0.01	0.01	0.01	0.01	0.01	0.01	0.01	0.01	0.01	0.01	0.01	0.0769	0.01	0.01	0.01	0.01	0.01	0.0802	0.01	0.0398	0.087
chromosome_2:7169910-7170022	N1	Cre02.g146400.v5.5	0.01	0.01	0.01	0.01	0.01	0.0642	0.01	0.0392	0.0334	0.01	0.0512	0.01	0.035	0.0302	0.0313	0.01	0.0362	0.01	0.0339	0.0296	0.01	0.0464	0.01	0.01	0.01	0.061	0.0509	0.01
chromosome_2:7250121-7250346	N5	Cre02.g145700.v5.5	0.01	0.01	0.01	0.01	0.01	0.01	0.01	0.01	0.01	0.01	0.01	0.01	0.0485	0.01	0.0931	0.01	0.0973	0.01	0.1013	0.1147	0.082	0.1202	0.1677	0.1297	0.1036	0.0815	0.0865	0.0482
chromosome_2:7383190-7383461	N1	Cre02.g144800.v5.5	0.01	0.01	0.01	0.01	0.01	0.0813	0.0704	0.01	0.01	0.01	0.01	0.01	0.01	0.01	0.01	0.01	0.01	0.01	0.01	0.01	0.01	0.01	0.01	0.01	0.01	0.01	0.01	0.01
chromosome_2:7443409-7443635	N5	Cre02.g144350.v5.5	0.01	0.01	0.01	0.01	0.01	0.01	0.01	0.01	0.01	0.01	0.01	0.01	0.01	0.01	0.01	0.01	0.2602	0.01	0.01	0.01	0.01	0.01	0.01	0.01	0.01	0.01	0.454	0.01
chromosome_2:7477856-7477949	N1	Cre02.g144100.v5.5	0.01	0.01	0.01	0.01	0.01	0.01	0.01	0.01	0.01	0.01	0.01	0.01	0.01	0.01	0.01	0.01	0.01	0.01	0.01	0.01	0.01	0.01	0.01	0.1343	0.01	0.01	0.01	0.01
chromosome_2:7911115-7911207	N1	Cre02.g141250.v5.5	0.01	0.01	0.01	0.01	0.01	0.01	0.0462	0.01	0.01	0.01	0.01	0.01	0.0359	0.0277	0.0197	0.01	0.0169	0.01	0.0323	0.01	0.0367	0.01	0.01	0.01	0.01	0.01	0.01	0.0838
chromosome_2:7978938-7979097	N1	Cre02.g140900.v5.5	0.01	0.01	0.01	0.01	0.01	0.01	0.01	0.01	0.01	0.01	0.01	0.01	0.01	0.0774	0.0593	0.01	0.0664	0.01	0.0875	0.01	0.01	0.0506	0.01	0.0725	0.01	0.01	0.0632	0.01
chromosome_2:8276093-8276145	N5	Cre02.g141346.v5.5	0.01	0.1212	0.1079	0.0868	0.0772	0.063	0.0582	0.0294	0.0676	0.0444	0.0328	0.0423	0.0284	0.0222	0.033	0.043	0.0308	0.0637	0.0544	0.0719	0.0663	0.049	0.0703	0.056	0.0535	0.0498	0.0784	0.0832
chromosome_2:8276243-8276297	N1	Cre02.g141346.v5.5	0.01	0.01	0.01	0.01	0.0554	0.0398	0.0381	0.0405	0.0344	0.0386	0.0244	0.01	0.0268	0.0227	0.0222	0.0514	0.0347	0.01	0.034	0.0576	0.0733	0.0556	0.0552	0.0617	0.0429	0.0387	0.0736	0.0658
chromosome_2:8438743-8439200	N1	Cre02.g141646.v5.5	0.01	0.01	0.01	0.01	0.01	0.01	0.01	0.01	0.01	0.01	0.01	0.01	0.01	0.01	0.1388	0.01	0.1639	0.01	0.01	0.01	0.1385	0.01	0.01	0.01	0.01	0.01	0.01	0.01
chromosome_2:8663311-8663384	N1	Cre02.g142086.v5.5	0.01	0.01	0.01	0.01	0.081	0.01	0.01	0.01	0.01	0.01	0.01	0.01	0.01	0.01	0.01	0.01	0.01	0.01	0.01	0.01	0.01	0.01	0.01	0.01	0.01	0.01	0.01	0.01
chromosome_2:8667647-8667829	N1	Cre02.g142126.v5.5	0.01	0.01	0.01	0.01	0.01	0.01	0.01	0.01	0.01	0.01	0.01	0.01	0.01	0.0114	0.01	0.01	0.0051	0.0099	0.01	0.0093	0.01	0.01	0.01	0.01	0.01	0.01	0.01	0.0606
chromosome_2:8680793-8680907	N1	Cre02.g142166.v5.5	0.01	0.01	0.01	0.01	0.01	0.01	0.01	0.01	0.01	0.01	0.01	0.01	0.01	0.01	0.01	0.01	0.01	0.01	0.01	0.01	0.01	0.0822	0.0333	0.0636	0.0871	0.0667	0.0836	0.0544
chromosome_2:8707298-8707457	N1	Cre02.g142226.v5.5	0.01	0.01	0.01	0.01	0.01	0.01	0.01	0.01	0.01	0.01	0.01	0.01	0.01	0.01	0.01	0.01	0.01	0.01	0.01	0.01	0.01	0.01	0.01	0.0797	0.01	0.01	0.01	0.01
chromosome_2:8709371-8709494	N1	Cre02.g142226.v5.5	0.01	0.01	0.01	0.01	0.01	0.01	0.01	0.01	0.01	0.01	0.01	0.01	0.01	0.01	0.01	0.01	0.01	0.01	0.01	0.01	0.01	0.01	0.01	0.01	0.01	0.01	0.0628	0.01
chromosome_2:8852899-8852958	N5	Cre02.g142627.v5.5	0.01	0.01	0.01	0.01	0.01	0.124	0.01	0.01	0.01	0.01	0.01	0.01	0.01	0.01	0.1132	0.01	0.1462	0.01	0.175	0.01	0.01	0.1364	0.1	0.1269	0.1106	0.1144	0.1085	0.1094
chromosome_2:8853094-8853154	N1	Cre02.g142627.v5.5	0.01	0.01	0.01	0.0373	0.01	0.0796	0.01	0.0602	0.01	0.01	0.01	0.01	0.01	0.01	0.0613	0.01	0.0531	0.01	0.01	0.0478	0.01	0.01	0.01	0.0454	0.01	0.0477	0.0405	0.0662
chromosome_2:8858713-8858769	N1	Cre02.g142627.v5.5	0.01	0.01	0.01	0.01	0.01	0.01	0.01	0.01	0.01	0.01	0.01	0.01	0.01	0.01	0.01	0.01	0.0892	0.01	0.01	0.01	0.01	0.01	0.01	0.01	0.0654	0.01	0.0579	0.01
chromosome_2:9142492-9142550	N5	Cre02.g143467.v5.5	0.01	0.01	0.01	0.1111	0.01	0.01	0.1456	0.1261	0.1875	0.2564	0.01	0.01	0.01	0.01	0.2727	0.01	0.01	0.01	0.01	0.01	0.2188	0.1069	0.1969	0.1498	0.203	0.1419	0.1926	0.1633
chromosome_2:9142757-9142814	N1	Cre02.g143467.v5.5	0.01	0.01	0.01	0.01	0.01	0.01	0.01	0.01	0.01	0.01	0.01	0.01	0.01	0.01	0.01	0.01	0.01	0.01	0.01	0.01	0.01	0.01	0.01	0.0447	0.01	0.01	0.01	0.0841
chromosome_2:9142991-9143055	N1	Cre02.g143467.v5.5	0.01	0.01	0.01	0.01	0.01	0.0308	0.0389	0.0321	0.01	0.01	0.01	0.01	0.01	0.01	0.087	0.01	0.01	0.01	0.01	0.01	0.01	0.01	0.01	0.01	0.0311	0.01	0.02	0.0296
chromosome_2:9143112-9143171	N1	Cre02.g143467.v5.5	0.01	0.01	0.01	0.01	0.01	0.01	0.01	0.01	0.01	0.01	0.01	0.01	0.01	0.01	0.01	0.01	0.01	0.01	0.01	0.01	0.0514	0.01	0.01	0.0201	0.01	0.01	0.0189	0.01
chromosome_2:9143434-9143528	N1	Cre02.g143467.v5.5	0.01	0.01	0.01	0.01	0.01	0.01	0.01	0.01	0.01	0.01	0.01	0.01	0.01	0.01	0.01	0.0733	0.0791	0.01	0.01	0.01	0.01	0.01	0.01	0.01	0.01	0.01	0.01	0.01
chromosome_2:9147489-9147544	N1	Cre02.g143487.v5.5	0.01	0.01	0.01	0.01	0.01	0.01	0.01	0.01	0.01	0.01	0.01	0.01	0.01	0.01	0.01	0.01	0.01	0.01	0.01	0.01	0.01	0.01	0.01	0.1265	0.0636	0.1006	0.0488	0.01
chromosome_2:9147960-9148012	N5	Cre02.g143487.v5.5	0.1485	0.01	0.01	0.0822	0.01	0.1161	0.1165	0.01	0.01	0.01	0.01	0.01	0.01	0.01	0.0516	0.2	0.1391	0.01	0.01	0.01	0.1295	0.1324	0.01	0.1309	0.0762	0.1453	0.146	0.0777
chromosome_2:9157481-9157539	N1	Cre02.g143487.v5.5	0.01	0.01	0.01	0.01	0.01	0.01	0.01	0.01	0.01	0.01	0.01	0.01	0.01	0.01	0.01	0.01	0.01	0.01	0.01	0.01	0.01	0.01	0.01	0.0515	0.01	0.01	0.01	0.01
chromosome_2:9169469-9169733	N5	Cre02.g143527.v5.5	0.01	0.01	0.01	0.01	0.01	0.01	0.01	0.01	0.01	0.01	0.01	0.01	0.01	0.01	0.01	0.01	0.0714	0.01	0.01	0.01	0.01	0.01	0.01	0.01	0.01	0.01	0.4262	0.01
chromosome_2:971163-971237	N5	Cre02.g080100.v5.5	0.01	0.01	0.01	0.01	0.01	0.01	0.01	0.01	0.01	0.01	0.01	0.01	0.01	0.01	0.01	0.01	0.1818	0.01	0.01	0.01	0.01	0.01	0.01	0.01	0.01	0.1389	0.2353	0.01
chromosome_3:100630-101736	N1	Cre03.g143927.v5.5	0.01	0.01	0.01	0.01	0.01	0.1146	0.01	0.01	0.01	0.01	0.01	0.01	0.01	0.01	0.01	0.01	0.01	0.01	0.01	0.01	0.01	0.01	0.01	0.01	0.01	0.01	0.01	0.01
chromosome_3:1143383-1143597	N1	Cre03.g149250.v5.5	0.01	0.01	0.01	0.01	0.01	0.01	0.01	0.01	0.01	0.01	0.01	0.01	0.01	0.01	0.01	0.01	0.01	0.01	0.01	0.01	0.01	0.01	0.01	0.01	0.01	0.0904	0.01	0.01
chromosome_3:1176467-1176716	N5	Cre03.g149450.v5.5	0.01	0.01	0.01	0.01	0.01	0.1901	0.01	0.1973	0.01	0.01	0.01	0.01	0.01	0.01	0.0541	0.1474	0.1368	0.01	0.01	0.01	0.2625	0.01	0.1846	0.01	0.1667	0.01	0.272	0.1923
chromosome_3:1322503-1322795	N5	Cre03.g150600.v5.5	0.01	0.01	0.01	0.01	0.01	0.2362	0.01	0.4118	0.01	0.01	0.01	0.01	0.01	0.01	0.01	0.01	0.01	0.01	0.01	0.5169	0.01	0.01	0.3364	0.01	0.01	0.2768	0.274	0.2042
chromosome_3:1522461-1522701	N1	Cre03.g152100.v5.5	0.01	0.01	0.01	0.01	0.01	0.01	0.01	0.01	0.01	0.01	0.01	0.01	0.01	0.01	0.01	0.01	0.01	0.01	0.01	0.01	0.01	0.01	0.01	0.0882	0.01	0.01	0.01	0.01
chromosome_3:1631283-1631493	N8	Cre03.g152900.v5.5	0.1629	0.01	0.1944	0.1471	0.1477	0.1582	0.1733	0.1698	0.1444	0.0924	0.01	0.01	0.01	0.3594	0.01	0.203	0.23	0.3649	0.3804	0.392	0.5641	0.478	0.493	0.5157	0.46	0.4837	0.5191	0.5562
chromosome_3:1947641-1947762	N1	Cre03.g155550.v5.5	0.01	0.01	0.01	0.01	0.01	0.01	0.01	0.01	0.01	0.01	0.01	0.0816	0.01	0.01	0.0315	0.01	0.01	0.01	0.01	0.01	0.01	0.01	0.01	0.01	0.01	0.01	0.01	0.01
chromosome_3:2040409-2040528	N1	Cre03.g156250.v5.5	0.01	0.01	0.01	0.01	0.01	0.01	0.01	0.01	0.01	0.01	0.01	0.01	0.01	0.01	0.01	0.01	0.01	0.01	0.01	0.01	0.01	0.01	0.01	0.01	0.0719	0.1279	0.01	0.01
chromosome_3:2288020-2288368	N4	Cre03.g158150.v5.5	0.259	0.01	0.3882	0.4974	0.3714	0.5433	0.4483	0.4154	0.4364	0.3262	0.3165	0.01	0.2703	0.3273	0.2885	0.3171	0.6421	0.5921	0.3538	0.5031	0.6	0.6349	0.6497	0.6374	0.581	0.5906	0.5749	0.6133
chromosome_3:2405525-2405732	N5	Cre03.g159016.v5.5	0.01	0.01	0.01	0.01	0.01	0.01	0.01	0.01	0.01	0.01	0.01	0.01	0.01	0.01	0.01	0.1757	0.1828	0.01	0.01	0.01	0.01	0.2642	0.2254	0.01	0.25	0.2198	0.313	0.2667
chromosome_3:2405773-2405947	N1	Cre03.g159016.v5.5	0.01	0.01	0.01	0.01	0.01	0.01	0.01	0.01	0.01	0.01	0.01	0.01	0.01	0.01	0.1011	0.01	0.1078	0.01	0.01	0.01	0.01	0.01	0.01	0.01	0.01	0.01	0.01	0.01
chromosome_3:2428032-2428168	N5	Cre03.g159200.v5.5	0.01	0.01	0.01	0.01	0.01	0.01	0.01	0.1429	0.01	0.01	0.01	0.01	0.01	0.1188	0.087	0.01	0.0798	0.01	0.1359	0.01	0.01	0.125	0.13	0.1215	0.1513	0.0782	0.1021	0.102
chromosome_3:2428377-2428610	N1	Cre03.g159200.v5.5	0.01	0.01	0.01	0.01	0.01	0.01	0.01	0.01	0.01	0.01	0.01	0.01	0.01	0.01	0.01	0.01	0.01	0.01	0.01	0.01	0.1176	0.01	0.01	0.1065	0.01	0.01	0.0478	0.01
chromosome_3:2509465-2509636	N5	Cre03.g159851.v5.5	0.01	0.01	0.01	0.01	0.01	0.01	0.01	0.01	0.01	0.01	0.01	0.01	0.01	0.01	0.01	0.01	0.01	0.01	0.01	0.01	0.01	0.01	0.01	0.1977	0.1795	0.01	0.1807	0.01
chromosome_3:253249-253650	N6	Cre03.g144444.v5.5	0.0962	0.01	0.01	0.01	0.01	0.2083	0.2619	0.25	0.01	0.01	0.01	0.01	0.1042	0.01	0.1102	0.1234	0.0874	0.1563	0.0865	0.152	0.197	0.1567	0.2516	0.3071	0.2611	0.1579	0.2177	0.2134
chromosome_3:2542158-2542539	N5	Cre03.g160200.v5.5	0.01	0.01	0.01	0.01	0.01	0.01	0.01	0.01	0.01	0.01	0.01	0.01	0.01	0.01	0.01	0.01	0.01	0.01	0.01	0.01	0.01	0.01	0.01	0.01	0.5378	0.5176	0.01	0.01
chromosome_3:2891702-2892040	N1	Cre03.g162850.v5.5	0.01	0.01	0.01	0.01	0.01	0.01	0.01	0.01	0.01	0.01	0.01	0.01	0.01	0.01	0.01	0.01	0.01	0.01	0.01	0.01	0.01	0.01	0.01	0.01	0.01	0.01	0.01	0.0925
chromosome_3:2974679-2974956	N1	Cre03.g163500.v5.5	0.01	0.01	0.01	0.01	0.01	0.1095	0.01	0.01	0.01	0.01	0.01	0.01	0.01	0.01	0.01	0.01	0.01	0.01	0.01	0.01	0.01	0.01	0.01	0.01	0.0652	0.0819	0.0616	0.01
chromosome_3:3239632-3239717	N1	Cre03.g165650.v5.5	0.01	0.01	0.01	0.01	0.01	0.01	0.01	0.01	0.01	0.01	0.01	0.01	0.01	0.01	0.0529	0.01	0.01	0.01	0.01	0.01	0.01	0.01	0.01	0.01	0.01	0.01	0.0508	0.01
chromosome_3:3463268-3463667	N1	Cre03.g167450.v5.5	0.01	0.01	0.01	0.01	0.01	0.01	0.01	0.01	0.01	0.01	0.01	0.01	0.01	0.01	0.01	0.01	0.01	0.01	0.01	0.01	0.01	0.01	0.01	0.01	0.01	0.01	0.0973	0.01
chromosome_3:358310-358595	N1	Cre03.g144807.v5.5	0.01	0.01	0.01	0.01	0.01	0.01	0.01	0.01	0.01	0.01	0.01	0.01	0.01	0.0409	0.024	0.01	0.0392	0.01	0.0563	0.0604	0.0635	0.055	0.055	0.0582	0.0337	0.0238	0.0282	0.0394
chromosome_3:3591165-3591360	N5	Cre03.g168350.v5.5	0.01	0.01	0.01	0.01	0.01	0.01	0.01	0.01	0.01	0.01	0.01	0.01	0.01	0.01	0.01	0.01	0.01	0.01	0.01	0.01	0.01	0.1795	0.2346	0.2889	0.01	0.01	0.01	0.01
chromosome_3:3592414-3592700	N1	Cre03.g168350.v5.5	0.1398	0.01	0.01	0.01	0.01	0.01	0.01	0.01	0.01	0.01	0.01	0.01	0.01	0.01	0.01	0.01	0.01	0.01	0.01	0.01	0.01	0.01	0.0941	0.01	0.01	0.01	0.01	0.01
chromosome_3:3678599-3678859	N2	Cre03.g169150.v5.5	0.01	0.01	0.01	0.01	0.01	0.2055	0.2	0.3878	0.2658	0.25	0.1724	0.01	0.01	0.3	0.1687	0.01	0.198	0.01	0.01	0.01	0.01	0.375	0.01	0.25	0.01	0.1714	0.2136	0.01
chromosome_3:3735421-3735630	N1	Cre03.g169700.v5.5	0.01	0.01	0.01	0.01	0.01	0.01	0.01	0.01	0.01	0.01	0.01	0.01	0.01	0.01	0.01	0.01	0.01	0.01	0.01	0.01	0.01	0.01	0.01	0.01	0.01	0.01	0.0538	0.01
chromosome_3:3802055-3802240	N1	Cre03.g170350.v5.5	0.01	0.01	0.01	0.01	0.01	0.01	0.01	0.01	0.01	0.01	0.01	0.01	0.01	0.01	0.01	0.01	0.01	0.01	0.01	0.01	0.0877	0.01	0.01	0.01	0.01	0.01	0.01	0.01
chromosome_3:3812392-3812662	N5	Cre03.g170450.v5.5	0.01	0.01	0.01	0.01	0.01	0.01	0.01	0.01	0.01	0.01	0.01	0.01	0.01	0.01	0.01	0.01	0.01	0.01	0.2961	0.01	0.01	0.01	0.01	0.3386	0.01	0.01	0.01	0.01
chromosome_3:3856976-3857238	N5	Cre03.g170900.v5.5	0.01	0.01	0.01	0.01	0.01	0.01	0.01	0.01	0.01	0.01	0.01	0.01	0.01	0.01	0.0606	0.01	0.056	0.01	0.01	0.01	0.1181	0.0864	0.01	0.1032	0.01	0.0618	0.0687	0.0957
chromosome_3:410812-410971	N1	Cre03.g144907.v5.5	0.01	0.01	0.01	0.01	0.01	0.01	0.01	0.01	0.01	0.01	0.01	0.01	0.01	0.01	0.01	0.01	0.01	0.01	0.01	0.01	0.01	0.01	0.01	0.01	0.01	0.01	0.0855	0.01
chromosome_3:420223-420467	N1	Cre03.g144947.v5.5	0.01	0.01	0.01	0.01	0.01	0.01	0.01	0.01	0.01	0.01	0.01	0.01	0.01	0.01	0.01	0.01	0.01	0.01	0.01	0.01	0.01	0.01	0.0381	0.0775	0.01	0.0474	0.0544	0.01
chromosome_3:4609112-4609643	N1	Cre03.g177053.v5.5	0.01	0.01	0.01	0.01	0.01	0.01	0.01	0.01	0.01	0.01	0.01	0.01	0.067	0.01	0.01	0.01	0.01	0.01	0.01	0.01	0.01	0.01	0.01	0.01	0.01	0.01	0.01	0.01
chromosome_3:4669473-4669667	N1	Cre03.g177550.v5.5	0.01	0.01	0.01	0.01	0.01	0.01	0.01	0.01	0.01	0.01	0.01	0.01	0.01	0.01	0.0892	0.01	0.0615	0.01	0.01	0.01	0.01	0.01	0.01	0.01	0.01	0.01	0.01	0.01
chromosome_3:470906-471130	N1	Cre03.g145107.v5.5	0.01	0.01	0.01	0.01	0.01	0.01	0.01	0.01	0.01	0.01	0.01	0.01	0.01	0.01	0.01	0.01	0.01	0.01	0.01	0.01	0.01	0.01	0.01	0.0615	0.01	0.01	0.01	0.01
chromosome_3:4774525-4775039	N5	Cre03.g178300.v5.5	0.01	0.01	0.01	0.01	0.01	0.2439	0.01	0.01	0.01	0.01	0.01	0.01	0.01	0.01	0.0564	0.0811	0.1029	0.0791	0.0717	0.1276	0.1042	0.1101	0.1346	0.1497	0.2038	0.2205	0.1203	0.1941
chromosome_3:4787376-4787556	N1	Cre03.g178400.v5.5	0.3226	0.01	0.01	0.01	0.01	0.01	0.01	0.01	0.01	0.01	0.01	0.01	0.01	0.01	0.01	0.01	0.01	0.01	0.01	0.01	0.01	0.01	0.01	0.01	0.01	0.01	0.01	0.01
chromosome_3:4860151-4860348	N2	Cre03.g179250.v5.5	0.2124	0.01	0.01	0.01	0.01	0.1359	0.4182	0.01	0.2667	0.1765	0.01	0.01	0.1043	0.1181	0.01	0.01	0.064	0.01	0.0847	0.01	0.01	0.01	0.01	0.01	0.01	0.01	0.202	0.2593
chromosome_3:494850-495164	N4	Cre03.g145167.v5.5	0.5241	0.2596	0.2613	0.2926	0.46	0.3778	0.4286	0.5682	0.6226	0.3667	0.5	0.4458	0.3582	0.4583	0.2848	0.4333	0.506	0.4578	0.4465	0.5276	0.4568	0.5826	0.7263	0.6914	0.6324	0.7659	0.7181	0.7242
chromosome_3:5091392-5091479	N1	Cre03.g181350.v5.5	0.01	0.01	0.01	0.01	0.01	0.01	0.01	0.01	0.01	0.01	0.01	0.01	0.01	0.01	0.01	0.01	0.01	0.01	0.122	0.01	0.01	0.01	0.01	0.01	0.01	0.01	0.01	0.01
chromosome_3:5150835-5151033	N1	Cre03.g182100.v5.5	0.01	0.01	0.01	0.01	0.01	0.01	0.01	0.01	0.01	0.01	0.01	0.01	0.01	0.01	0.01	0.0965	0.08	0.01	0.01	0.01	0.1096	0.01	0.01	0.01	0.01	0.01	0.01	0.01
chromosome_3:5234832-5235323	N2	Cre03.g182950.v5.5	0.0571	0.01	0.1536	0.1379	0.01	0.1724	0.1304	0.1618	0.1512	0.0948	0.0818	0.1052	0.0735	0.1086	0.1167	0.1689	0.1366	0.0963	0.1355	0.1376	0.1465	0.1338	0.1216	0.1535	0.0987	0.066	0.0961	0.1412
chromosome_3:5235397-5236108	N4	Cre03.g182950.v5.5	0.2586	0.4218	0.4068	0.5164	0.5941	0.5721	0.5687	0.5417	0.5508	0.3882	0.3779	0.3699	0.3674	0.4879	0.5833	0.6401	0.6462	0.5983	0.5722	0.727	0.7826	0.6731	0.7719	0.738	0.7143	0.7	0.7276	0.773
chromosome_3:5335699-5335825	N5	Cre03.g184000.v5.5	0.01	0.01	0.01	0.01	0.01	0.01	0.01	0.01	0.01	0.01	0.01	0.01	0.01	0.01	0.0629	0.01	0.0663	0.1618	0.1008	0.1071	0.1392	0.01	0.01	0.01	0.1619	0.01	0.078	0.1339
chromosome_3:5362534-5362680	N5	Cre03.g184350.v5.5	0.01	0.01	0.01	0.2727	0.01	0.01	0.01	0.01	0.01	0.01	0.01	0.01	0.01	0.01	0.0991	0.01	0.01	0.01	0.1558	0.01	0.01	0.01	0.01	0.2754	0.01	0.01	0.1013	0.01
chromosome_3:536763-536993	N1	Cre03.g145347.v5.5	0.0789	0.01	0.01	0.01	0.01	0.01	0.01	0.01	0.01	0.01	0.01	0.01	0.01	0.01	0.01	0.01	0.01	0.01	0.01	0.01	0.01	0.01	0.01	0.01	0.01	0.01	0.01	0.01
chromosome_3:5369507-5369662	N1	Cre03.g184450.v5.5	0.1225	0.01	0.01	0.01	0.01	0.01	0.01	0.01	0.01	0.01	0.01	0.01	0.01	0.01	0.01	0.01	0.01	0.01	0.01	0.01	0.01	0.01	0.01	0.01	0.01	0.01	0.01	0.01
chromosome_3:5390611-5390793	N1	Cre03.g184651.v5.5	0.01	0.01	0.01	0.01	0.01	0.01	0.01	0.01	0.01	0.01	0.01	0.01	0.01	0.0819	0.0436	0.0398	0.0274	0.01	0.074	0.01	0.01	0.01	0.01	0.0385	0.01	0.01	0.1047	0.01
chromosome_3:5392015-5392088	N7	Cre03.g184651.v5.5	0.01	0.01	0.5	0.4722	0.4444	0.4237	0.4634	0.486	0.4746	0.4476	0.281	0.4305	0.4103	0.3902	0.2473	0.3193	0.3678	0.2577	0.4815	0.4451	0.4318	0.5375	0.3951	0.4742	0.3089	0.4569	0.408	0.4872
chromosome_3:5392156-5392283	N2	Cre03.g184651.v5.5	0.01	0.01	0.3659	0.4177	0.01	0.1935	0.3218	0.2985	0.3063	0.2238	0.01	0.3	0.2126	0.098	0.1659	0.1629	0.1447	0.193	0.2304	0.1711	0.2202	0.2174	0.2114	0.2059	0.0992	0.1429	0.1938	0.236
chromosome_3:5395203-5395358	N1	Cre03.g184700.v5.5	0.01	0.01	0.01	0.0746	0.01	0.1012	0.1469	0.0873	0.01	0.01	0.01	0.01	0.0494	0.01	0.0175	0.0292	0.01	0.01	0.01	0.01	0.01	0.01	0.01	0.01	0.01	0.01	0.01	0.01
chromosome_3:5395513-5395621	N2	Cre03.g184700.v5.5	0.1961	0.01	0.01	0.0846	0.01	0.1233	0.0943	0.1011	0.0949	0.1148	0.01	0.1211	0.0903	0.0618	0.0408	0.0628	0.0395	0.064	0.0502	0.0973	0.099	0.0918	0.121	0.0985	0.0284	0.01	0.1392	0.1745
chromosome_3:5452047-5452330	N1	Cre03.g185300.v5.5	0.01	0.01	0.01	0.01	0.01	0.0833	0.01	0.01	0.01	0.01	0.01	0.01	0.01	0.01	0.01	0.01	0.01	0.01	0.01	0.01	0.01	0.01	0.01	0.01	0.01	0.01	0.01	0.01
chromosome_3:5526803-5527040	N1	Cre03.g186050.v5.5	0.01	0.01	0.01	0.01	0.01	0.01	0.01	0.01	0.01	0.01	0.01	0.01	0.01	0.01	0.01	0.01	0.0448	0.01	0.01	0.01	0.1111	0.01	0.01	0.01	0.01	0.01	0.01	0.1043
chromosome_3:5534253-5534321	N1	Cre03.g186200.v5.5	0.01	0.01	0.01	0.01	0.01	0.01	0.01	0.01	0.01	0.01	0.01	0.01	0.01	0.01	0.01	0.01	0.01	0.01	0.01	0.01	0.01	0.01	0.01	0.01	0.01	0.0784	0.01	0.01
chromosome_3:5534387-5534480	N1	Cre03.g186200.v5.5	0.01	0.01	0.01	0.01	0.01	0.01	0.01	0.01	0.01	0.01	0.01	0.01	0.01	0.01	0.01	0.01	0.0259	0.01	0.01	0.01	0.01	0.01	0.01	0.0366	0.01	0.1124	0.0361	0.01
chromosome_3:598987-599077	N5	Cre03.g145607.v5.5	0.01	0.01	0.01	0.01	0.01	0.01	0.01	0.0575	0.0882	0.01	0.0655	0.01	0.049	0.01	0.0271	0.0866	0.0787	0.01	0.0988	0.1026	0.01	0.01	0.1261	0.1139	0.0965	0.1031	0.1452	0.01
chromosome_3:6392309-6392496	N1	Cre03.g194150.v5.5	0.01	0.01	0.01	0.01	0.01	0.01	0.01	0.01	0.01	0.01	0.01	0.01	0.01	0.01	0.01	0.01	0.01	0.01	0.01	0.01	0.01	0.01	0.01	0.01	0.0511	0.01	0.01	0.01
chromosome_3:6460425-6460746	N1	Cre03.g194800.v5.5	0.0685	0.01	0.01	0.01	0.01	0.01	0.01	0.01	0.01	0.01	0.01	0.01	0.01	0.01	0.01	0.01	0.01	0.01	0.0238	0.01	0.01	0.01	0.01	0.0478	0.01	0.01	0.0374	0.01
chromosome_3:6492749-6493096	N1	Cre03.g195050.v5.5	0.01	0.01	0.01	0.01	0.01	0.01	0.01	0.01	0.01	0.01	0.01	0.01	0.01	0.01	0.01	0.01	0.01	0.01	0.01	0.01	0.01	0.1593	0.01	0.01	0.01	0.1373	0.0873	0.1382
chromosome_3:6493493-6493877	N1	Cre03.g195050.v5.5	0.01	0.01	0.01	0.01	0.01	0.01	0.01	0.01	0.01	0.01	0.01	0.01	0.01	0.01	0.0976	0.01	0.01	0.01	0.01	0.01	0.01	0.01	0.01	0.1068	0.01	0.01	0.01	0.01
chromosome_3:6553583-6553801	N1	Cre03.g195700.v5.5	0.01	0.01	0.01	0.01	0.01	0.01	0.01	0.01	0.01	0.01	0.01	0.01	0.01	0.01	0.01	0.01	0.01	0.01	0.01	0.01	0.01	0.01	0.01	0.01	0.01	0.01	0.0759	0.01
chromosome_3:6597228-6597342	N1	Cre03.g196350.v5.5	0.01	0.01	0.01	0.01	0.01	0.01	0.01	0.01	0.01	0.01	0.01	0.01	0.01	0.01	0.01	0.01	0.01	0.01	0.01	0.01	0.01	0.0535	0.01	0.0536	0.01	0.01	0.01	0.01
chromosome_3:6605123-6605290	N1	Cre03.g196450.v5.5	0.01	0.01	0.01	0.01	0.01	0.01	0.01	0.01	0.1058	0.01	0.01	0.01	0.01	0.01	0.01	0.01	0.01	0.01	0.01	0.01	0.01	0.01	0.01	0.01	0.01	0.01	0.01	0.01
chromosome_3:6613399-6613737	N1	Cre03.g196550.v5.5	0.01	0.01	0.01	0.01	0.01	0.0776	0.01	0.0478	0.01	0.01	0.028	0.01	0.0357	0.01	0.0485	0.0611	0.0581	0.01	0.0339	0.01	0.01	0.01	0.01	0.01	0.01	0.01	0.01	0.01
chromosome_3:6738132-6738317	N1	Cre03.g197900.v5.5	0.01	0.01	0.01	0.0532	0.01	0.01	0.01	0.01	0.01	0.01	0.01	0.01	0.01	0.01	0.01	0.01	0.01	0.01	0.01	0.01	0.01	0.01	0.01	0.01	0.01	0.01	0.01	0.01
chromosome_3:707042-707250	N1	Cre03.g146027.v5.5	0.01	0.01	0.01	0.01	0.01	0.01	0.1205	0.01	0.01	0.01	0.01	0.01	0.01	0.01	0.01	0.01	0.01	0.01	0.01	0.01	0.01	0.01	0.01	0.01	0.01	0.01	0.01	0.01
chromosome_3:707520-707736	N4	Cre03.g146027.v5.5	0.2975	0.4909	0.4783	0.4769	0.5077	0.5556	0.5035	0.5169	0.4468	0.5514	0.3261	0.01	0.4159	0.5909	0.597	0.58	0.5634	0.7778	0.5429	0.4366	0.3836	0.5795	0.6119	0.5155	0.2526	0.1933	0.4174	0.4355
chromosome_3:7194840-7195744	N1	Cre03.g207950.v5.5	0.01	0.01	0.175	0.01	0.01	0.01	0.01	0.01	0.01	0.01	0.01	0.01	0.01	0.01	0.01	0.01	0.01	0.01	0.01	0.01	0.01	0.01	0.01	0.01	0.01	0.01	0.01	0.01
chromosome_3:7253248-7253358	N1	Cre03.g207502.v5.5	0.01	0.01	0.01	0.01	0.01	0.01	0.01	0.01	0.01	0.01	0.01	0.01	0.01	0.01	0.0433	0.0847	0.01	0.01	0.01	0.01	0.01	0.01	0.01	0.01	0.01	0.01	0.01	0.01
chromosome_3:7460547-7461335	N5	Cre03.g205701.v5.5	0.01	0.01	0.01	0.01	0.01	0.01	0.01	0.01	0.01	0.01	0.01	0.01	0.01	0.1429	0.102	0.01	0.01	0.01	0.2024	0.01	0.2692	0.01	0.1304	0.1598	0.1282	0.1061	0.0913	0.2451
chromosome_3:7479710-7479857	N1	Cre03.g205600.v5.5	0.01	0.01	0.01	0.01	0.01	0.01	0.01	0.01	0.01	0.01	0.01	0.01	0.01	0.01	0.0039	0.0103	0.0137	0.0316	0.0239	0.0169	0.0303	0.0394	0.0315	0.0529	0.046	0.0514	0.0399	0.0395
chromosome_3:7629983-7630668	N1	Cre03.g204350.v5.5	0.01	0.01	0.01	0.01	0.01	0.01	0.01	0.01	0.01	0.01	0.01	0.01	0.01	0.01	0.01	0.01	0.01	0.01	0.01	0.01	0.01	0.01	0.01	0.01	0.01	0.01	0.0707	0.01
chromosome_3:7812107-7812358	N1	Cre03.g202950.v5.5	0.01	0.01	0.0185	0.0178	0.01	0.0245	0.01	0.01	0.01	0.01	0.01	0.01	0.01	0.01	0.01	0.01	0.01	0.01	0.01	0.01	0.0773	0.0563	0.01	0.0487	0.01	0.01	0.0336	0.0376
chromosome_3:7872674-7872915	N5	Cre03.g202600.v5.5	0.08	0.01	0.01	0.01	0.01	0.0852	0.01	0.01	0.01	0.01	0.01	0.01	0.01	0.01	0.01	0.01	0.01	0.01	0.1102	0.01	0.1131	0.0688	0.0853	0.0753	0.0642	0.0686	0.0517	0.0818
chromosome_3:8061261-8061536	N1	Cre03.g201300.v5.5	0.01	0.01	0.01	0.01	0.01	0.01	0.01	0.01	0.01	0.01	0.01	0.01	0.01	0.01	0.01	0.01	0.01	0.01	0.01	0.01	0.01	0.01	0.01	0.01	0.0815	0.0483	0.01	0.01
chromosome_3:8164379-8164967	N1	Cre03.g200400.v5.5	0.01	0.01	0.01	0.01	0.01	0.01	0.01	0.01	0.01	0.01	0.01	0.01	0.01	0.01	0.01	0.01	0.01	0.01	0.01	0.01	0.01	0.01	0.01	0.01	0.01	0.01	0.0534	0.01
chromosome_3:843518-843876	N1	Cre03.g146507.v5.5	0.01	0.01	0.01	0.01	0.01	0.01	0.01	0.01	0.01	0.01	0.01	0.01	0.01	0.01	0.01	0.01	0.01	0.01	0.01	0.01	0.01	0.01	0.01	0.01	0.01	0.0942	0.01	0.01
chromosome_3:8507130-8507353	N1	Cre03.g200879.v5.5	0.01	0.01	0.01	0.01	0.01	0.01	0.01	0.01	0.01	0.01	0.01	0.01	0.01	0.01	0.01	0.01	0.01	0.01	0.01	0.01	0.01	0.01	0.01	0.0852	0.01	0.01	0.01	0.01
chromosome_3:8560051-8560517	N1	Cre03.g202113.v5.5	0.01	0.01	0.01	0.01	0.01	0.01	0.01	0.01	0.01	0.01	0.01	0.01	0.01	0.01	0.0318	0.01	0.01	0.01	0.01	0.01	0.01	0.01	0.01	0.0425	0.01	0.01	0.0856	0.01
chromosome_3:8560572-8561086	N1	Cre03.g202113.v5.5	0.01	0.01	0.01	0.01	0.01	0.01	0.01	0.01	0.01	0.01	0.01	0.01	0.01	0.01	0.01	0.01	0.01	0.01	0.01	0.01	0.01	0.01	0.01	0.01	0.01	0.01	0.0563	0.0787
chromosome_3:8561140-8561478	N1	Cre03.g202113.v5.5	0.01	0.01	0.01	0.01	0.01	0.01	0.01	0.01	0.01	0.01	0.01	0.01	0.01	0.01	0.01	0.01	0.01	0.01	0.01	0.01	0.01	0.01	0.01	0.01	0.0587	0.01	0.0684	0.01
chromosome_3:8562173-8562348	N1	Cre03.g202113.v5.5	0.01	0.01	0.01	0.01	0.01	0.01	0.01	0.01	0.01	0.01	0.01	0.01	0.01	0.01	0.01	0.01	0.01	0.01	0.01	0.01	0.01	0.01	0.01	0.01	0.01	0.01	0.0556	0.01
chromosome_3:8836414-8836710	N5	Cre03.g206593.v5.5	0.01	0.01	0.01	0.01	0.01	0.01	0.01	0.01	0.01	0.01	0.01	0.01	0.01	0.01	0.0201	0.0491	0.0525	0.01	0.0598	0.0855	0.0721	0.0842	0.1056	0.0808	0.0833	0.01	0.0714	0.01
chromosome_3:8940694-8941522	N1	Cre03.g208721.v5.5	0.01	0.01	0.01	0.01	0.01	0.01	0.01	0.01	0.01	0.01	0.01	0.01	0.01	0.01	0.01	0.01	0.01	0.01	0.01	0.01	0.01	0.01	0.01	0.01	0.01	0.01	0.0898	0.01
chromosome_3:9045378-9045679	N5	Cre03.g210513.v5.5	0.01	0.01	0.01	0.01	0.01	0.01	0.01	0.01	0.01	0.01	0.01	0.01	0.01	0.01	0.01	0.01	0.01	0.01	0.01	0.01	0.01	0.01	0.01	0.0733	0.1859	0.1271	0.1535	0.01
chromosome_3:9213803-9213888	N5	Cre03.g213537.v5.5	0.0325	0.0231	0.0149	0.0169	0.0178	0.0204	0.0212	0.0222	0.0208	0.024	0.027	0.0242	0.022	0.0296	0.0173	0.0367	0.0413	0.045	0.052	0.0526	0.0637	0.08	0.0687	0.0747	0.0807	0.0774	0.0721	0.0825
chromosome_3:971221-971494	N1	Cre03.g148000.v5.5	0.01	0.01	0.01	0.01	0.01	0.01	0.01	0.01	0.01	0.01	0.01	0.01	0.01	0.01	0.01	0.01	0.0738	0.01	0.01	0.01	0.01	0.01	0.01	0.01	0.01	0.01	0.01	0.01
chromosome_3:98544-98735	N2	Cre03.g143927.v5.5	0.01	0.01	0.1765	0.01	0.1618	0.1818	0.1683	0.01	0.1772	0.1477	0.1039	0.01	0.01	0.01	0.01	0.01	0.1287	0.01	0.01	0.01	0.01	0.01	0.01	0.1351	0.01	0.01	0.01	0.01
chromosome_4:1183979-1184426	N1	Cre04.g215600.v5.5	0.01	0.01	0.01	0.01	0.01	0.01	0.01	0.01	0.01	0.01	0.01	0.01	0.01	0.01	0.01	0.01	0.01	0.01	0.01	0.01	0.01	0.01	0.01	0.01	0.01	0.0586	0.01	0.01
chromosome_4:1184549-1184889	N1	Cre04.g215600.v5.5	0.01	0.01	0.01	0.01	0.01	0.01	0.01	0.01	0.01	0.01	0.01	0.01	0.01	0.01	0.01	0.01	0.01	0.01	0.031	0.01	0.01	0.01	0.0574	0.0363	0.0603	0.0624	0.01	0.01
chromosome_4:1186483-1186726	N1	Cre04.g215600.v5.5	0.01	0.01	0.01	0.01	0.01	0.01	0.01	0.01	0.01	0.01	0.01	0.01	0.01	0.01	0.01	0.01	0.01	0.01	0.01	0.01	0.01	0.01	0.01	0.01	0.0633	0.0625	0.01	0.01
chromosome_4:1186781-1186933	N1	Cre04.g215600.v5.5	0.01	0.01	0.01	0.01	0.01	0.01	0.01	0.01	0.01	0.01	0.01	0.01	0.01	0.01	0.01	0.01	0.01	0.01	0.01	0.01	0.01	0.01	0.01	0.01	0.01	0.063	0.01	0.01
chromosome_4:1188735-1189038	N1	Cre04.g215550.v5.5	0.01	0.01	0.01	0.01	0.01	0.01	0.01	0.01	0.01	0.01	0.01	0.01	0.01	0.01	0.01	0.01	0.01	0.01	0.01	0.01	0.01	0.01	0.01	0.01	0.01	0.01	0.0422	0.078
chromosome_4:1227535-1227772	N1	Cre04.g215250.v5.5	0.01	0.01	0.01	0.01	0.01	0.01	0.01	0.01	0.01	0.01	0.01	0.01	0.01	0.01	0.01	0.01	0.01	0.01	0.01	0.01	0.01	0.01	0.01	0.01	0.01	0.0557	0.01	0.01
chromosome_4:1451276-1452283	N5	Cre04.g214150.v5.5	0.01	0.1172	0.0906	0.0349	0.0293	0.0209	0.0173	0.0179	0.0196	0.0324	0.0293	0.0232	0.0248	0.021	0.0212	0.0208	0.0182	0.0254	0.0248	0.0439	0.0813	0.1093	0.1199	0.1547	0.1379	0.1397	0.1111	0.1856
chromosome_4:1466210-1467443	N1	Cre04.g214000.v5.5	0.01	0.01	0.01	0.01	0.01	0.01	0.01	0.01	0.01	0.01	0.01	0.01	0.01	0.01	0.01	0.01	0.01	0.01	0.01	0.01	0.01	0.01	0.01	0.01	0.01	0.2929	0.01	0.01
chromosome_4:1762621-1764289	N1	Cre04.g212200.v5.5	0.01	0.01	0.01	0.01	0.01	0.01	0.01	0.0904	0.01	0.01	0.01	0.01	0.01	0.01	0.01	0.01	0.01	0.01	0.01	0.01	0.01	0.01	0.01	0.01	0.0445	0.01	0.0392	0.01
chromosome_4:1764697-1765273	N4	Cre04.g212200.v5.5	0.5636	0.01	0.6176	0.6563	0.01	0.5635	0.5591	0.7143	0.6392	0.887	0.7424	0.7752	0.76	0.7615	0.7802	0.7756	0.8607	0.9048	0.8778	0.9058	0.89	0.9069	0.9544	0.9409	0.9037	0.8354	0.8972	0.9044
chromosome_4:2809975-2810562	N1	Cre04.g224100.v5.5	0.01	0.01	0.01	0.01	0.01	0.01	0.01	0.01	0.01	0.01	0.01	0.01	0.01	0.01	0.01	0.01	0.01	0.01	0.01	0.01	0.01	0.01	0.01	0.0962	0.1342	0.01	0.1485	0.01
chromosome_4:3132125-3132316	N1	Cre04.g225900.v5.5	0.01	0.01	0.01	0.01	0.01	0.01	0.01	0.01	0.01	0.01	0.01	0.01	0.01	0.01	0.01	0.01	0.01	0.01	0.01	0.01	0.01	0.01	0.01	0.01	0.0308	0.0503	0.01	0.01
chromosome_4:3133964-3134140	N7	Cre04.g225950.v5.5	0.202	0.01	0.01	0.01	0.01	0.2286	0.01	0.2581	0.01	0.2373	0.2667	0.01	0.01	0.01	0.272	0.3085	0.3228	0.3725	0.3656	0.01	0.01	0.4405	0.4744	0.4462	0.481	0.4615	0.4	0.2698
chromosome_4:3158713-3158797	N1	Cre04.g226100.v5.5	0.01	0.01	0.01	0.01	0.01	0.01	0.01	0.01	0.01	0.01	0.01	0.01	0.01	0.01	0.01	0.01	0.01	0.01	0.01	0.01	0.01	0.01	0.01	0.01	0.01	0.01	0.0641	0.01
chromosome_4:3207793-3207908	N1	Cre04.g226350.v5.5	0.01	0.01	0.01	0.01	0.01	0.01	0.01	0.01	0.01	0.01	0.01	0.01	0.01	0.01	0.01	0.01	0.0536	0.0604	0.0645	0.0752	0.0676	0.01	0.01	0.0803	0.01	0.01	0.01	0.01
chromosome_4:3524214-3524586	N1	Cre04.g228150.v5.5	0.01	0.01	0.01	0.01	0.01	0.01	0.01	0.141	0.01	0.01	0.01	0.01	0.01	0.01	0.01	0.01	0.01	0.01	0.01	0.01	0.01	0.01	0.01	0.01	0.01	0.01	0.01	0.01
chromosome_4:353540-353686	N1	Cre04.g217911.v5.5	0.0921	0.01	0.01	0.01	0.01	0.1429	0.01	0.1101	0.01	0.01	0.01	0.01	0.01	0.01	0.01	0.01	0.01	0.01	0.01	0.01	0.01	0.01	0.01	0.01	0.01	0.0853	0.01	0.01
chromosome_4:355839-356342	N1	Cre04.g217911.v5.5	0.01	0.01	0.01	0.01	0.01	0.01	0.01	0.01	0.01	0.01	0.01	0.01	0.01	0.01	0.01	0.01	0.01	0.01	0.01	0.01	0.01	0.01	0.01	0.01	0.01	0.062	0.0444	0.01
chromosome_4:366324-366908	N6	Cre04.g217913.v5.5	0.01	0.01	0.01	0.01	0.01	0.01	0.01	0.01	0.01	0.01	0.01	0.01	0.01	0.01	0.01	0.01	0.1789	0.01	0.29	0.01	0.4	0.01	0.38	0.4589	0.287	0.01	0.3846	0.3137
chromosome_4:3778962-3779211	N6	Cre04.g229550.v5.5	0.01	0.01	0.3023	0.01	0.01	0.01	0.01	0.2317	0.01	0.01	0.01	0.01	0.01	0.01	0.0933	0.2273	0.1534	0.01	0.1897	0.01	0.3524	0.2053	0.2773	0.2311	0.1969	0.2688	0.2102	0.2794
chromosome_4:3857656-3858141	N5	Cre04.g230144.v5.5	0.01	0.01	0.01	0.01	0.01	0.01	0.01	0.0983	0.01	0.01	0.01	0.01	0.01	0.044	0.052	0.01	0.0464	0.01	0.01	0.01	0.01	0.0694	0.01	0.1144	0.2031	0.3188	0.1818	0.1015
chromosome_4:3956615-3956844	N5	Cre04.g231418.v5.5	0.01	0.01	0.01	0.1325	0.01	0.01	0.01	0.01	0.1406	0.0806	0.1242	0.01	0.01	0.01	0.0933	0.01	0.01	0.01	0.156	0.2095	0.1724	0.2222	0.3333	0.1977	0.01	0.01	0.1224	0.1681
chromosome_5:1279917-1279990	N1	Cre05.g245150.v5.5	0.01	0.01	0.01	0.01	0.01	0.01	0.01	0.01	0.01	0.01	0.01	0.01	0.01	0.01	0.0437	0.0597	0.0558	0.01	0.01	0.01	0.01	0.01	0.1022	0.0777	0.0593	0.0524	0.0947	0.0619
chromosome_5:1357129-1357502	N5	Cre05.g244550.v5.5	0.01	0.01	0.01	0.01	0.01	0.2105	0.3077	0.01	0.01	0.01	0.01	0.01	0.01	0.01	0.01	0.01	0.1569	0.01	0.1216	0.01	0.01	0.01	0.2656	0.3008	0.01	0.01	0.1882	0.2763
chromosome_5:1358158-1358339	N2	Cre05.g244550.v5.5	0.0448	0.01	0.1011	0.1671	0.2288	0.1549	0.177	0.12	0.147	0.1362	0.1619	0.2368	0.1373	0.1939	0.1111	0.0946	0.158	0.0843	0.1386	0.01	0.2103	0.1982	0.1728	0.2209	0.2031	0.0868	0.1402	0.1934
chromosome_5:1358368-1358983	N7	Cre05.g244550.v5.5	0.01	0.01	0.2991	0.3024	0.3758	0.2528	0.3322	0.2349	0.244	0.2159	0.3114	0.2889	0.2695	0.2846	0.2472	0.2148	0.2322	0.1787	0.2246	0.3075	0.3416	0.3218	0.3489	0.4046	0.3267	0.2705	0.3536	0.3725
chromosome_5:1359195-1359358	N1	Cre05.g244550.v5.5	0.01	0.01	0.01	0.01	0.01	0.01	0.01	0.01	0.01	0.01	0.01	0.01	0.01	0.01	0.01	0.01	0.01	0.01	0.0571	0.01	0.01	0.01	0.01	0.01	0.01	0.01	0.0227	0.0461
chromosome_5:1359637-1359966	N2	Cre05.g244550.v5.5	0.1887	0.2125	0.2778	0.2036	0.1807	0.2326	0.1713	0.2457	0.2012	0.2077	0.2174	0.01	0.1953	0.1346	0.1732	0.1389	0.1765	0.1196	0.1367	0.1353	0.2086	0.2188	0.1895	0.2006	0.1485	0.127	0.223	0.1667
chromosome_5:1460741-1460981	N6	Cre05.g243950.v5.5	0.01	0.01	0.01	0.01	0.01	0.01	0.01	0.0755	0.01	0.01	0.01	0.01	0.01	0.01	0.1299	0.1493	0.1761	0.2289	0.2458	0.3254	0.3208	0.2982	0.3146	0.3636	0.4093	0.2698	0.3558	0.4194
chromosome_5:1653019-1653090	N1	Cre05.g243151.v5.5	0.01	0.01	0.01	0.01	0.01	0.01	0.01	0.01	0.01	0.01	0.01	0.01	0.01	0.0588	0.0438	0.048	0.0677	0.01	0.01	0.1745	0.01	0.01	0.01	0.01	0.01	0.01	0.0327	0.075
chromosome_5:1746865-1747450	N1	Cre05.g242600.v5.5	0.01	0.01	0.01	0.01	0.01	0.01	0.01	0.01	0.01	0.01	0.01	0.01	0.01	0.01	0.01	0.01	0.01	0.01	0.01	0.01	0.01	0.01	0.01	0.01	0.1129	0.0877	0.01	0.01
chromosome_5:1873174-1873373	N1	Cre05.g241650.v5.5	0.01	0.01	0.01	0.01	0.0746	0.0516	0.01	0.01	0.01	0.01	0.01	0.01	0.01	0.01	0.01	0.01	0.01	0.01	0.01	0.01	0.01	0.01	0.01	0.01	0.01	0.01	0.01	0.01
chromosome_5:191761-191878	N5	Cre05.g234200.v5.5	0.01	0.01	0.01	0.01	0.01	0.01	0.01	0.01	0.01	0.01	0.01	0.01	0.01	0.01	0.01	0.01	0.01	0.01	0.01	0.0968	0.1392	0.1176	0.1138	0.0593	0.01	0.01	0.0422	0.1387
chromosome_5:1920128-1920736	N1	Cre05.g241633.v5.5	0.01	0.01	0.01	0.01	0.01	0.01	0.01	0.01	0.01	0.01	0.01	0.01	0.01	0.01	0.01	0.01	0.01	0.01	0.01	0.01	0.01	0.01	0.01	0.01	0.01	0.01	0.0904	0.01
chromosome_5:1965024-1965353	N1	Cre05.g241638.v5.5	0.01	0.01	0.01	0.01	0.01	0.01	0.01	0.01	0.01	0.01	0.01	0.01	0.01	0.01	0.01	0.01	0.1158	0.01	0.0899	0.01	0.01	0.01	0.01	0.01	0.01	0.01	0.01	0.1798
chromosome_5:2247894-2248085	N1	Cre05.g234663.v5.5	0.01	0.01	0.01	0.01	0.01	0.1667	0.01	0.01	0.01	0.01	0.01	0.01	0.01	0.01	0.01	0.01	0.01	0.01	0.01	0.01	0.01	0.01	0.01	0.01	0.01	0.01	0.0927	0.01
chromosome_5:2297105-2297352	N1	Cre05.g234700.v5.5	0.01	0.01	0.01	0.01	0.01	0.1091	0.01	0.0764	0.01	0.01	0.01	0.01	0.01	0.01	0.01	0.01	0.01	0.01	0.01	0.01	0.01	0.01	0.01	0.01	0.01	0.01	0.01	0.01
chromosome_5:2325645-2325850	N1	Cre05.g234850.v5.5	0.01	0.01	0.01	0.0519	0.01	0.01	0.01	0.01	0.01	0.01	0.01	0.01	0.01	0.01	0.01	0.01	0.01	0.01	0.01	0.01	0.01	0.01	0.01	0.01	0.01	0.01	0.01	0.01
chromosome_5:239992-240229	N1	Cre05.g233751.v5.5	0.01	0.01	0.01	0.01	0.1215	0.059	0.058	0.0382	0.01	0.0291	0.0233	0.0249	0.0304	0.0247	0.01	0.0378	0.0194	0.01	0.0363	0.0315	0.0275	0.01	0.0347	0.01	0.01	0.01	0.01	0.01
chromosome_5:2800565-2800779	N1	Cre05.g237250.v5.5	0.01	0.01	0.01	0.01	0.01	0.0973	0.0562	0.01	0.0819	0.01	0.01	0.01	0.01	0.01	0.01	0.01	0.01	0.01	0.01	0.01	0.01	0.01	0.01	0.01	0.01	0.01	0.01	0.01
chromosome_5:2800977-2801173	N1	Cre05.g237250.v5.5	0.01	0.01	0.01	0.01	0.0553	0.01	0.0696	0.0879	0.0838	0.01	0.01	0.01	0.01	0.01	0.01	0.01	0.01	0.01	0.01	0.01	0.01	0.094	0.01	0.01	0.01	0.01	0.01	0.01
chromosome_5:2803819-2804351	N1	Cre05.g237250.v5.5	0.01	0.01	0.01	0.01	0.01	0.01	0.01	0.01	0.01	0.01	0.01	0.01	0.2231	0.01	0.01	0.01	0.01	0.01	0.01	0.01	0.01	0.01	0.01	0.01	0.01	0.01	0.01	0.01
chromosome_5:2804562-2805046	N2	Cre05.g237250.v5.5	0.01	0.01	0.3478	0.326	0.2556	0.3212	0.3243	0.1988	0.2642	0.01	0.01	0.01	0.01	0.01	0.01	0.01	0.01	0.01	0.01	0.01	0.01	0.01	0.01	0.01	0.01	0.01	0.01	0.01
chromosome_5:2805178-2805494	N2	Cre05.g237250.v5.5	0.01	0.01	0.1705	0.01	0.2609	0.2534	0.1613	0.2061	0.2418	0.131	0.14	0.01	0.01	0.01	0.01	0.01	0.01	0.01	0.01	0.01	0.01	0.01	0.01	0.01	0.01	0.01	0.01	0.01
chromosome_5:3044184-3044338	N1	Cre05.g238687.v5.5	0.01	0.01	0.0662	0.01	0.01	0.01	0.0363	0.028	0.01	0.01	0.01	0.01	0.01	0.01	0.01	0.01	0.01	0.01	0.01	0.01	0.01	0.0216	0.01	0.01	0.0147	0.01	0.011	0.01
chromosome_5:3366303-3367939	N5	Cre05.g240850.v5.5	0.0803	0.01	0.0228	0.0185	0.036	0.0852	0.1125	0.1328	0.0509	0.0484	0.0415	0.01	0.025	0.0193	0.0231	0.0574	0.0344	0.0325	0.0232	0.0549	0.0562	0.0643	0.0688	0.075	0.0826	0.0586	0.0827	0.0828
chromosome_5:379754-379865	N6	Cre05.g233051.v5.5	0.01	0.01	0.01	0.1624	0.01	0.2353	0.0811	0.1071	0.01	0.01	0.01	0.01	0.01	0.01	0.0841	0.01	0.1515	0.01	0.2872	0.1288	0.2283	0.1718	0.1786	0.1952	0.2138	0.0985	0.1456	0.2239
chromosome_5:655550-656632	N5	Cre05.g231002.v5.5	0.01	0.01	0.01	0.01	0.01	0.01	0.01	0.01	0.01	0.01	0.01	0.01	0.01	0.01	0.01	0.01	0.01	0.01	0.01	0.01	0.01	0.01	0.2308	0.2	0.01	0.01	0.2292	0.192
chromosome_6:1014046-1014312	N7	Cre06.g256000.v5.5	0.2392	0.2336	0.2215	0.2199	0.3988	0.2687	0.2861	0.2225	0.1797	0.1417	0.1309	0.1614	0.144	0.2768	0.2061	0.2468	0.2664	0.3077	0.3957	0.3932	0.4792	0.3866	0.4115	0.5106	0.5266	0.3774	0.4184	0.5738
chromosome_6:108952-109124	N1	Cre06.g249800.v5.5	0.01	0.01	0.01	0.01	0.01	0.087	0.01	0.0466	0.01	0.01	0.01	0.01	0.01	0.01	0.01	0.01	0.01	0.01	0.01	0.0213	0.01	0.01	0.01	0.0462	0.07	0.0739	0.056	0.0657
chromosome_6:1109485-1109728	N1	Cre06.g256750.v5.5	0.01	0.01	0.01	0.01	0.01	0.01	0.01	0.01	0.01	0.01	0.01	0.01	0.01	0.01	0.01	0.01	0.01	0.01	0.01	0.01	0.01	0.01	0.01	0.01	0.01	0.094	0.01	0.01
chromosome_6:1110405-1110755	N1	Cre06.g256750.v5.5	0.01	0.01	0.01	0.01	0.01	0.01	0.01	0.01	0.01	0.01	0.01	0.01	0.01	0.01	0.01	0.01	0.01	0.01	0.01	0.01	0.01	0.01	0.01	0.01	0.01	0.0707	0.01	0.01
chromosome_6:1496119-1496478	N6	Cre06.g259650.v5.5	0.0718	0.01	0.01	0.01	0.01	0.01	0.01	0.01	0.01	0.01	0.01	0.01	0.01	0.01	0.0674	0.01	0.0621	0.01	0.01	0.1321	0.1579	0.2157	0.2446	0.2511	0.2052	0.2474	0.1857	0.2477
chromosome_6:1730648-1730784	N5	Cre06.g261750.v5.5	0.0733	0.01	0.01	0.01	0.0601	0.01	0.01	0.01	0.01	0.01	0.01	0.01	0.01	0.0423	0.0394	0.0374	0.0512	0.01	0.0614	0.062	0.0717	0.0754	0.0886	0.077	0.0798	0.0501	0.0696	0.076
chromosome_6:1886920-1887043	N1	Cre06.g263250.v5.5	0.01	0.01	0.01	0.01	0.01	0.075	0.01	0.01	0.01	0.01	0.01	0.01	0.01	0.01	0.01	0.01	0.01	0.01	0.01	0.01	0.01	0.01	0.01	0.01	0.01	0.01	0.01	0.01
chromosome_6:1921870-1922150	N1	Cre06.g263550.v5.5	0.01	0.01	0.01	0.01	0.01	0.01	0.01	0.01	0.01	0.01	0.01	0.01	0.01	0.01	0.01	0.01	0.01	0.01	0.01	0.01	0.01	0.01	0.01	0.1481	0.1787	0.0959	0.01	0.01
chromosome_6:19447-19524	N1	Cre06.g248750.v5.5	0.01	0.01	0.01	0.01	0.01	0.01	0.01	0.01	0.01	0.01	0.01	0.01	0.01	0.01	0.01	0.0621	0.01	0.01	0.01	0.01	0.01	0.01	0.01	0.01	0.01	0.01	0.01	0.01
chromosome_6:22717-23022	N2	Cre06.g248800.v5.5	0.1742	0.2658	0.01	0.01	0.01	0.01	0.01	0.01	0.01	0.01	0.3898	0.3244	0.2863	0.2516	0.2017	0.1952	0.1694	0.01	0.1622	0.01	0.01	0.203	0.01	0.01	0.01	0.1939	0.01	0.01
chromosome_6:2293131-2293220	N5	Cre06.g267000.v5.5	0.01	0.01	0.01	0.01	0.01	0.01	0.01	0.01	0.01	0.01	0.01	0.01	0.01	0.01	0.01	0.01	0.0655	0.01	0.0714	0.1138	0.0707	0.1527	0.0977	0.0749	0.0575	0.0642	0.0734	0.1111
chromosome_6:2293276-2293386	N1	Cre06.g267000.v5.5	0.01	0.01	0.01	0.01	0.01	0.01	0.01	0.01	0.01	0.01	0.01	0.01	0.01	0.01	0.01	0.01	0.0373	0.01	0.01	0.01	0.0695	0.1097	0.01	0.01	0.01	0.01	0.01	0.0814
chromosome_6:2309787-2309922	N7	Cre06.g267150.v5.5	0.2363	0.2414	0.1974	0.325	0.01	0.551	0.3188	0.2903	0.2419	0.2794	0.1097	0.2372	0.243	0.1169	0.1521	0.2206	0.2755	0.2892	0.2961	0.2966	0.3407	0.2785	0.3913	0.3237	0.3153	0.281	0.3113	0.4433
chromosome_6:23399-23660	N3	Cre06.g248850.v5.5	0.6449	0.6552	0.01	0.01	0.01	0.01	0.01	0.01	0.01	0.3931	0.01	0.434	0.4914	0.01	0.4709	0.6403	0.7206	0.01	0.6677	0.6667	0.01	0.569	0.6	0.01	0.3906	0.01	0.4063	0.5407
chromosome_6:23756-23882	N1	Cre06.g248850.v5.5	0.2	0.01	0.01	0.01	0.01	0.01	0.01	0.01	0.01	0.01	0.01	0.01	0.01	0.01	0.01	0.01	0.01	0.01	0.01	0.01	0.01	0.01	0.01	0.01	0.01	0.01	0.01	0.01
chromosome_6:258297-258410	N5	Cre06.g250800.v5.5	0.01	0.01	0.0386	0.0421	0.01	0.064	0.0802	0.0866	0.0974	0.0799	0.0455	0.01	0.0364	0.0468	0.0533	0.0494	0.0615	0.0917	0.06	0.1083	0.1022	0.0868	0.0747	0.1301	0.0712	0.01	0.01	0.01
chromosome_6:26581-26693	N1	Cre06.g248850.v5.5	0.01	0.01	0.01	0.01	0.01	0.01	0.01	0.01	0.01	0.01	0.01	0.01	0.01	0.01	0.0429	0.01	0.0476	0.01	0.01	0.01	0.01	0.01	0.01	0.01	0.01	0.01	0.1422	0.01
chromosome_6:2684461-2684636	N1	Cre06.g270276.v5.5	0.01	0.01	0.01	0.01	0.01	0.01	0.01	0.01	0.01	0.01	0.01	0.01	0.01	0.01	0.01	0.01	0.01	0.01	0.01	0.01	0.01	0.01	0.01	0.01	0.127	0.1227	0.1257	0.01
chromosome_6:2684727-2684864	N1	Cre06.g270276.v5.5	0.01	0.01	0.01	0.01	0.01	0.01	0.01	0.01	0.01	0.01	0.01	0.01	0.01	0.01	0.01	0.01	0.01	0.01	0.01	0.01	0.01	0.01	0.01	0.01	0.0588	0.01	0.01	0.01
chromosome_6:2972257-2972623	N4	Cre06.g273250.v5.5	0.4459	0.4	0.338	0.4086	0.404	0.5045	0.5237	0.4237	0.4894	0.4765	0.5117	0.4977	0.4505	0.6232	0.6146	0.6409	0.7037	0.6258	0.6691	0.6507	0.663	0.6765	0.7149	0.6275	0.6073	0.6109	0.615	0.5431
chromosome_6:3180087-3180328	N5	Cre06.g275600.v5.5	0.01	0.01	0.01	0.01	0.01	0.01	0.01	0.25	0.01	0.01	0.01	0.01	0.01	0.01	0.01	0.01	0.01	0.01	0.01	0.01	0.01	0.01	0.01	0.01	0.2571	0.3182	0.1657	0.01
chromosome_6:3242454-3242560	N1	Cre06.g276400.v5.5	0.0992	0.01	0.01	0.01	0.01	0.01	0.01	0.01	0.01	0.01	0.01	0.01	0.01	0.01	0.01	0.01	0.01	0.01	0.01	0.01	0.01	0.01	0.01	0.01	0.01	0.01	0.01	0.01
chromosome_6:3273712-3274047	N5	Cre06.g277000.v5.5	0.01	0.01	0.01	0.01	0.01	0.01	0.01	0.01	0.01	0.01	0.01	0.01	0.0833	0.01	0.01	0.0987	0.0722	0.01	0.0619	0.0942	0.0714	0.1184	0.0909	0.1369	0.0833	0.01	0.1386	0.01
chromosome_6:3486308-3486529	N5	Cre06.g278101.v5.5	0.01	0.01	0.01	0.01	0.2759	0.194	0.01	0.1504	0.01	0.01	0.01	0.01	0.01	0.01	0.1075	0.1127	0.3016	0.01	0.3	0.01	0.01	0.01	0.01	0.01	0.01	0.01	0.2368	0.01
chromosome_6:3526160-3526457	N1	Cre06.g278109.v5.5	0.01	0.01	0.01	0.01	0.01	0.01	0.01	0.01	0.01	0.01	0.01	0.01	0.01	0.01	0.01	0.01	0.01	0.01	0.01	0.01	0.01	0.01	0.01	0.169	0.1409	0.01	0.01	0.01
chromosome_6:3553028-3553288	N1	Cre06.g278115.v5.5	0.01	0.01	0.01	0.01	0.01	0.01	0.01	0.01	0.01	0.01	0.01	0.01	0.01	0.01	0.01	0.01	0.01	0.01	0.01	0.01	0.01	0.01	0.01	0.01	0.1667	0.2304	0.0611	0.01
chromosome_6:3553325-3553480	N1	Cre06.g278115.v5.5	0.01	0.01	0.01	0.01	0.01	0.01	0.01	0.01	0.01	0.01	0.01	0.01	0.01	0.01	0.01	0.01	0.01	0.01	0.01	0.01	0.01	0.01	0.01	0.01	0.0623	0.01	0.01	0.01
chromosome_6:3553675-3553779	N1	Cre06.g278115.v5.5	0.01	0.01	0.01	0.01	0.01	0.01	0.01	0.01	0.01	0.01	0.01	0.01	0.01	0.01	0.01	0.01	0.01	0.01	0.01	0.01	0.01	0.01	0.01	0.01	0.0812	0.0751	0.0332	0.01
chromosome_6:3553800-3554193	N1	Cre06.g278115.v5.5	0.01	0.01	0.01	0.01	0.01	0.01	0.01	0.01	0.01	0.01	0.01	0.01	0.01	0.01	0.01	0.01	0.01	0.01	0.01	0.01	0.01	0.01	0.01	0.01	0.0503	0.109	0.0285	0.01
chromosome_6:3592333-3592627	N1	Cre06.g278122.v5.5	0.01	0.01	0.01	0.01	0.01	0.01	0.01	0.01	0.01	0.01	0.01	0.01	0.01	0.01	0.01	0.01	0.01	0.01	0.01	0.01	0.01	0.01	0.01	0.01	0.01	0.0667	0.01	0.01
chromosome_6:3645247-3645398	N5	Cre06.g278131.v5.5	0.01	0.01	0.01	0.01	0.01	0.01	0.01	0.01	0.01	0.01	0.01	0.01	0.01	0.01	0.01	0.01	0.01	0.01	0.1515	0.1846	0.01	0.01	0.1085	0.1593	0.01	0.0794	0.1204	0.1875
chromosome_6:3750379-3750559	N1	Cre06.g278154.v5.5	0.01	0.01	0.01	0.01	0.0612	0.01	0.01	0.01	0.01	0.01	0.01	0.01	0.01	0.01	0.01	0.01	0.01	0.01	0.01	0.01	0.01	0.01	0.01	0.01	0.01	0.01	0.01	0.01
chromosome_6:3774344-3774522	N1	Cre06.g278160.v5.5	0.01	0.01	0.01	0.01	0.01	0.0502	0.01	0.01	0.01	0.01	0.01	0.01	0.01	0.01	0.01	0.01	0.01	0.01	0.01	0.01	0.01	0.01	0.01	0.01	0.01	0.01	0.01	0.01
chromosome_6:3816944-3817114	N1	Cre06.g278168.v5.5	0.2771	0.0757	0.0793	0.01	0.0545	0.0743	0.0674	0.0874	0.0526	0.0434	0.0818	0.1304	0.0889	0.01	0.0564	0.1223	0.053	0.0673	0.0532	0.0638	0.01	0.01	0.01	0.01	0.01	0.01	0.01	0.01
chromosome_6:3919058-3919161	N6	Cre06.g278184.v5.5	0.01	0.01	0.1277	0.1656	0.1842	0.1538	0.1441	0.01	0.01	0.01	0.01	0.2312	0.01	0.1477	0.1366	0.01	0.0785	0.01	0.2162	0.2558	0.3273	0.1373	0.241	0.2263	0.1146	0.1053	0.0923	0.211
chromosome_6:3919322-3919516	N6	Cre06.g278184.v5.5	0.1357	0.01	0.01	0.1081	0.01	0.1667	0.1731	0.01	0.1392	0.01	0.01	0.01	0.01	0.1196	0.203	0.1504	0.145	0.3231	0.2114	0.3636	0.3191	0.2737	0.3093	0.372	0.2	0.3143	0.2667	0.25
chromosome_6:4058760-4058841	N1	Cre06.g278211.v5.5	0.01	0.01	0.01	0.0305	0.0491	0.0368	0.051	0.0379	0.0391	0.0301	0.0245	0.03	0.0394	0.0174	0.013	0.0197	0.0354	0.01	0.0268	0.0285	0.01	0.01	0.01	0.0423	0.0364	0.01	0.0415	0.0526
chromosome_6:4150957-4151129	N5	Cre06.g278228.v5.5	0.01	0.01	0.01	0.01	0.01	0.01	0.01	0.01	0.01	0.01	0.01	0.01	0.01	0.01	0.0859	0.01	0.0803	0.01	0.1133	0.01	0.2609	0.01	0.1068	0.0795	0.01	0.01	0.1179	0.2
chromosome_6:415292-415517	N5	Cre06.g252150.v5.5	0.01	0.01	0.01	0.01	0.01	0.01	0.01	0.01	0.01	0.01	0.01	0.01	0.01	0.01	0.0405	0.0512	0.0574	0.01	0.0602	0.0841	0.0826	0.1	0.1517	0.1715	0.1111	0.01	0.1292	0.1504
chromosome_6:4222735-4223757	N7	Cre06.g278239.v5.5	0.3278	0.1075	0.1233	0.1588	0.2619	0.2664	0.3058	0.2416	0.01	0.2439	0.1923	0.01	0.1643	0.0731	0.0551	0.1424	0.2222	0.3821	0.4004	0.547	0.6709	0.7534	0.7692	0.8068	0.8239	0.01	0.7029	0.836
chromosome_6:4274070-4274373	N1	Cre06.g278251.v5.5	0.01	0.01	0.01	0.01	0.01	0.01	0.01	0.01	0.01	0.01	0.01	0.01	0.01	0.01	0.01	0.01	0.2632	0.01	0.01	0.01	0.01	0.01	0.01	0.01	0.01	0.01	0.01	0.01
chromosome_6:4292758-4293455	N5	Cre06.g278254.v5.5	0.2282	0.1592	0.2151	0.01	0.01	0.01	0.01	0.01	0.01	0.01	0.01	0.0926	0.1012	0.01	0.0789	0.0876	0.0678	0.01	0.0842	0.0857	0.0759	0.1152	0.0994	0.1198	0.1033	0.1265	0.1192	0.1224
chromosome_6:4387776-4387892	N1	Cre06.g278271.v5.5	0.01	0.01	0.01	0.01	0.01	0.01	0.01	0.01	0.01	0.01	0.01	0.01	0.01	0.01	0.01	0.01	0.01	0.01	0.01	0.01	0.01	0.0478	0.01	0.0755	0.01	0.0878	0.1023	0.1061
chromosome_6:4388404-4388604	N1	Cre06.g278271.v5.5	0.01	0.01	0.01	0.01	0.01	0.01	0.01	0.01	0.01	0.01	0.01	0.01	0.01	0.01	0.01	0.01	0.01	0.01	0.01	0.01	0.071	0.01	0.0769	0.0551	0.0737	0.01	0.0485	0.0833
chromosome_6:4388717-4388887	N1	Cre06.g278271.v5.5	0.01	0.01	0.01	0.01	0.01	0.01	0.01	0.01	0.01	0.01	0.01	0.01	0.01	0.01	0.01	0.01	0.01	0.01	0.01	0.01	0.01	0.01	0.01	0.0484	0.01	0.01	0.0502	0.01
chromosome_6:4802624-4802940	N1	Cre06.g278150.v5.5	0.01	0.01	0.01	0.01	0.01	0.01	0.01	0.01	0.01	0.01	0.01	0.01	0.01	0.01	0.01	0.01	0.01	0.01	0.0746	0.01	0.01	0.01	0.01	0.01	0.01	0.01	0.01	0.01
chromosome_6:4841242-4841398	N5	Cre06.g278500.v5.5	0.0564	0.01	0.0561	0.01	0.01	0.01	0.01	0.01	0.01	0.01	0.01	0.01	0.01	0.01	0.01	0.0588	0.0523	0.01	0.01	0.0857	0.1375	0.0804	0.1042	0.01	0.0933	0.0691	0.1128	0.1196
chromosome_6:4871451-4871534	N1	Cre06.g278900.v5.5	0.01	0.01	0.01	0.01	0.01	0.01	0.01	0.0761	0.01	0.01	0.01	0.01	0.01	0.01	0.01	0.01	0.01	0.01	0.01	0.01	0.01	0.01	0.01	0.01	0.01	0.01	0.01	0.01
chromosome_6:4928891-4929127	N1	Cre06.g279474.v5.5	0.01	0.01	0.01	0.01	0.01	0.01	0.01	0.01	0.01	0.01	0.01	0.01	0.01	0.01	0.01	0.01	0.01	0.01	0.01	0.01	0.01	0.01	0.0738	0.0707	0.01	0.01	0.01	0.01
chromosome_6:4976537-4976655	N6	Cre06.g279900.v5.5	0.01	0.01	0.193	0.01	0.01	0.1682	0.01	0.1667	0.2358	0.1288	0.1376	0.01	0.1412	0.01	0.0876	0.1148	0.1514	0.1159	0.1707	0.01	0.1826	0.3037	0.2778	0.2885	0.2252	0.1901	0.2276	0.2581
chromosome_6:5075109-5075305	N1	Cre06.g280500.v5.5	0.01	0.01	0.01	0.01	0.01	0.01	0.01	0.01	0.01	0.01	0.01	0.01	0.01	0.01	0.01	0.01	0.01	0.01	0.01	0.01	0.01	0.1	0.01	0.0929	0.01	0.01	0.01	0.01
chromosome_6:5154590-5154686	N1	Cre06.g281400.v5.5	0.01	0.01	0.01	0.01	0.01	0.01	0.01	0.01	0.01	0.01	0.01	0.01	0.01	0.01	0.0449	0.01	0.01	0.01	0.0663	0.01	0.01	0.01	0.01	0.01	0.01	0.01	0.01	0.01
chromosome_6:5324641-5325054	N1	Cre06.g283200.v5.5	0.01	0.01	0.01	0.01	0.01	0.01	0.01	0.01	0.01	0.01	0.01	0.01	0.01	0.01	0.01	0.01	0.01	0.01	0.01	0.01	0.01	0.01	0.0542	0.01	0.01	0.0749	0.0401	0.01
chromosome_6:5374655-5374841	N6	Cre06.g283700.v5.5	0.01	0.01	0.01	0.01	0.01	0.01	0.01	0.32	0.01	0.01	0.01	0.01	0.01	0.01	0.01	0.01	0.2222	0.01	0.2319	0.01	0.01	0.2586	0.3333	0.2958	0.2656	0.01	0.2714	0.01
chromosome_6:5412698-5413676	N5	Cre06.g284050.v5.5	0.01	0.01	0.01	0.01	0.01	0.01	0.01	0.01	0.01	0.01	0.01	0.01	0.01	0.01	0.01	0.01	0.01	0.01	0.01	0.01	0.01	0.01	0.01	0.1525	0.1667	0.1162	0.1519	0.01
chromosome_6:5575832-5575915	N1	Cre06.g285500.v5.5	0.01	0.01	0.01	0.01	0.01	0.01	0.01	0.01	0.01	0.01	0.01	0.01	0.01	0.01	0.01	0.01	0.0542	0.01	0.01	0.01	0.01	0.01	0.01	0.01	0.01	0.01	0.01	0.01
chromosome_6:5609668-5609892	N1	Cre06.g285750.v5.5	0.01	0.01	0.01	0.01	0.01	0.01	0.01	0.01	0.01	0.01	0.01	0.01	0.01	0.1452	0.01	0.01	0.1494	0.01	0.0804	0.01	0.01	0.01	0.01	0.01	0.01	0.01	0.01	0.01
chromosome_6:5678034-5678405	N1	Cre06.g286450.v5.5	0.01	0.01	0.01	0.01	0.01	0.01	0.01	0.01	0.01	0.01	0.01	0.01	0.01	0.01	0.01	0.01	0.01	0.01	0.01	0.01	0.01	0.01	0.01	0.01	0.01	0.01	0.01	0.0539
chromosome_6:5679522-5680160	N1	Cre06.g286450.v5.5	0.01	0.01	0.01	0.01	0.01	0.01	0.01	0.01	0.01	0.01	0.01	0.01	0.01	0.01	0.01	0.01	0.01	0.01	0.01	0.01	0.01	0.01	0.01	0.01	0.01	0.01	0.0531	0.01
chromosome_6:5837374-5837466	N1	Cre06.g287800.v5.5	0.01	0.01	0.01	0.01	0.01	0.01	0.01	0.01	0.01	0.01	0.01	0.01	0.01	0.01	0.01	0.01	0.01	0.01	0.01	0.01	0.01	0.1128	0.0774	0.01	0.01	0.0876	0.1022	0.0943
chromosome_6:5838311-5838533	N1	Cre06.g287800.v5.5	0.01	0.01	0.01	0.01	0.01	0.01	0.01	0.01	0.01	0.01	0.01	0.01	0.01	0.01	0.01	0.01	0.01	0.01	0.01	0.0721	0.01	0.01	0.01	0.0427	0.01	0.049	0.0342	0.058
chromosome_6:6129984-6130290	N1	Cre06.g290050.v5.5	0.01	0.01	0.01	0.01	0.01	0.01	0.01	0.01	0.01	0.01	0.01	0.01	0.01	0.01	0.01	0.01	0.01	0.01	0.01	0.01	0.01	0.01	0.2083	0.01	0.01	0.01	0.1572	0.01
chromosome_6:6245020-6245255	N6	Cre06.g290900.v5.5	0.01	0.01	0.01	0.01	0.01	0.01	0.01	0.0952	0.01	0.01	0.0703	0.01	0.01	0.0493	0.0365	0.0831	0.0684	0.1068	0.0931	0.1148	0.1472	0.1362	0.2027	0.1757	0.2763	0.1611	0.2379	0.2705
chromosome_6:6298661-6298853	N1	Cre06.g291500.v5.5	0.01	0.01	0.01	0.01	0.01	0.01	0.01	0.01	0.01	0.01	0.01	0.01	0.01	0.01	0.073	0.01	0.01	0.01	0.01	0.01	0.01	0.01	0.01	0.01	0.01	0.01	0.01	0.01
chromosome_6:7233839-7233984	N1	Cre06.g298100.v5.5	0.01	0.01	0.01	0.01	0.01	0.01	0.01	0.0272	0.01	0.01	0.0219	0.0111	0.0169	0.01	0.005	0.01	0.0139	0.01	0.01	0.01	0.01	0.01	0.01	0.0125	0.0516	0.0453	0.0315	0.01
chromosome_6:7373146-7373229	N7	Cre06.g299200.v5.5	0.01	0.01	0.01	0.01	0.01	0.3611	0.01	0.01	0.3261	0.3864	0.1596	0.01	0.191	0.4396	0.2708	0.2941	0.2583	0.25	0.3736	0.4211	0.4571	0.3259	0.4091	0.4395	0.3542	0.2969	0.3233	0.3161
chromosome_6:7453239-7453494	N1	Cre06.g300050.v5.5	0.01	0.01	0.01	0.01	0.01	0.01	0.01	0.01	0.01	0.01	0.01	0.01	0.01	0.01	0.01	0.01	0.01	0.01	0.01	0.01	0.01	0.01	0.01	0.01	0.01	0.01	0.01	0.1325
chromosome_6:7459630-7459889	N5	Cre06.g300100.v5.5	0.3673	0.01	0.01	0.01	0.01	0.2424	0.01	0.01	0.01	0.01	0.01	0.01	0.01	0.01	0.1979	0.01	0.1563	0.01	0.1473	0.01	0.3	0.3091	0.01	0.2014	0.2414	0.01	0.1966	0.01
chromosome_6:7467435-7467544	N1	Cre06.g300144.v5.5	0.0546	0.01	0.01	0.01	0.01	0.01	0.01	0.01	0.01	0.01	0.01	0.01	0.01	0.01	0.01	0.0613	0.01	0.01	0.01	0.01	0.01	0.01	0.01	0.01	0.01	0.01	0.01	0.01
chromosome_6:7467872-7467960	N1	Cre06.g300150.v5.5	0.01	0.01	0.01	0.01	0.01	0.01	0.01	0.01	0.01	0.01	0.01	0.1579	0.01	0.01	0.1273	0.01	0.0773	0.01	0.01	0.1216	0.1034	0.1322	0.01	0.065	0.01	0.01	0.01	0.01
chromosome_6:7490581-7490677	N1	Cre06.g300350.v5.5	0.01	0.01	0.01	0.01	0.01	0.01	0.01	0.01	0.01	0.01	0.01	0.01	0.01	0.2828	0.1653	0.01	0.01	0.01	0.01	0.01	0.01	0.01	0.3704	0.01	0.01	0.01	0.01	0.01
chromosome_6:7576614-7576717	N6	Cre06.g300933.v5.5	0.3607	0.01	0.01	0.01	0.01	0.449	0.2941	0.1774	0.209	0.01	0.01	0.01	0.01	0.01	0.1838	0.1966	0.1656	0.1786	0.2439	0.1982	0.2439	0.3364	0.2414	0.2628	0.1563	0.01	0.2	0.2414
chromosome_6:7668739-7668812	N5	Cre06.g301600.v5.5	0.01	0.01	0.01	0.01	0.01	0.01	0.01	0.01	0.01	0.01	0.01	0.01	0.01	0.01	0.01	0.01	0.2188	0.01	0.01	0.01	0.01	0.01	0.2292	0.3649	0.25	0.01	0.1565	0.2235
chromosome_6:7825237-7825581	N1	Cre06.g302750.v5.5	0.01	0.01	0.01	0.01	0.01	0.0711	0.0586	0.0597	0.01	0.01	0.01	0.01	0.0378	0.01	0.01	0.01	0.01	0.01	0.01	0.01	0.01	0.01	0.01	0.1681	0.01	0.01	0.01	0.01
chromosome_6:7839551-7839704	N1	Cre06.g302900.v5.5	0.01	0.01	0.01	0.01	0.01	0.01	0.01	0.01	0.01	0.01	0.01	0.01	0.01	0.01	0.0321	0.01	0.01	0.01	0.0686	0.01	0.01	0.01	0.01	0.1005	0.01	0.01	0.0826	0.01
chromosome_6:7861555-7861704	N1	Cre06.g303100.v5.5	0.01	0.01	0.01	0.01	0.01	0.2059	0.2778	0.01	0.01	0.01	0.01	0.01	0.01	0.01	0.01	0.01	0.01	0.01	0.01	0.01	0.01	0.01	0.01	0.01	0.01	0.01	0.01	0.01
chromosome_6:8242641-8243418	N1	Cre06.g305900.v5.5	0.01	0.01	0.01	0.01	0.01	0.01	0.01	0.01	0.01	0.01	0.01	0.01	0.01	0.01	0.01	0.01	0.0288	0.01	0.044	0.01	0.0573	0.0765	0.01	0.0809	0.0717	0.01	0.1046	0.01
chromosome_6:8303332-8303639	N1	Cre06.g306050.v5.5	0.01	0.01	0.01	0.01	0.01	0.01	0.01	0.01	0.01	0.01	0.01	0.01	0.01	0.01	0.01	0.01	0.01	0.01	0.01	0.01	0.01	0.01	0.01	0.01	0.01	0.0659	0.01	0.01
chromosome_6:8372940-8373253	N1	Cre06.g306700.v5.5	0.01	0.01	0.01	0.01	0.01	0.01	0.01	0.01	0.01	0.01	0.01	0.01	0.01	0.01	0.01	0.01	0.01	0.01	0.01	0.01	0.01	0.01	0.01	0.01	0.0651	0.043	0.01	0.01
chromosome_6:8427668-8427850	N1	Cre06.g307150.v5.5	0.01	0.01	0.01	0.01	0.01	0.0597	0.0345	0.0241	0.01	0.01	0.01	0.01	0.01	0.01	0.01	0.01	0.01	0.01	0.01	0.01	0.01	0.01	0.01	0.01	0.01	0.01	0.01	0.01
chromosome_6:8590597-8590710	N5	Cre06.g308750.v5.5	0.01	0.01	0.01	0.01	0.01	0.01	0.01	0.01	0.01	0.01	0.01	0.01	0.01	0.01	0.3273	0.01	0.01	0.01	0.1461	0.01	0.1667	0.1864	0.01	0.19	0.01	0.3333	0.1569	0.01
chromosome_6:8602094-8602694	N1	Cre06.g308950.v5.5	0.01	0.01	0.01	0.01	0.01	0.01	0.0148	0.01	0.01	0.01	0.01	0.01	0.01	0.01	0.01	0.01	0.01	0.01	0.01	0.01	0.01	0.0435	0.0448	0.0315	0.062	0.0432	0.01	0.01
chromosome_6:9001484-9001573	N1	Cre06.g311850.v5.5	0.01	0.01	0.01	0.01	0.01	0.0504	0.0361	0.0244	0.0491	0.01	0.01	0.01	0.01	0.01	0.01	0.01	0.0222	0.01	0.0389	0.01	0.01	0.01	0.01	0.01	0.01	0.01	0.01	0.01
chromosome_6:9005972-9006043	N1	Cre06.g311950.v5.5	0.01	0.01	0.01	0.01	0.01	0.01	0.01	0.01	0.01	0.01	0.01	0.01	0.01	0.01	0.01	0.01	0.01	0.01	0.0859	0.01	0.01	0.01	0.0811	0.1092	0.01	0.01	0.01	0.01
chromosome_6:92489-92584	N1	Cre06.g249650.v5.5	0.01	0.01	0.01	0.01	0.01	0.01	0.01	0.01	0.01	0.01	0.01	0.01	0.01	0.01	0.05	0.01	0.01	0.01	0.01	0.01	0.01	0.01	0.01	0.01	0.01	0.01	0.01	0.01
chromosome_7:124050-124158	N1	Cre07.g313050.v5.5	0.01	0.01	0.01	0.01	0.01	0.01	0.01	0.01	0.01	0.01	0.01	0.01	0.01	0.01	0.01	0.01	0.0952	0.01	0.01	0.01	0.01	0.01	0.01	0.01	0.01	0.01	0.01	0.01
chromosome_7:1439142-1439229	N1	Cre07.g323100.v5.5	0.01	0.01	0.01	0.01	0.01	0.01	0.01	0.01	0.01	0.01	0.0481	0.0644	0.01	0.01	0.01	0.01	0.01	0.01	0.01	0.01	0.01	0.01	0.01	0.01	0.0769	0.01	0.01	0.01
chromosome_7:1574860-1575212	N1	Cre07.g324600.v5.5	0.01	0.01	0.01	0.01	0.01	0.01	0.01	0.01	0.01	0.01	0.01	0.01	0.01	0.01	0.01	0.01	0.01	0.01	0.01	0.01	0.01	0.01	0.01	0.01	0.01	0.0526	0.01	0.01
chromosome_7:19875-20133	N1	Cre07.g312050.v5.5	0.01	0.01	0.01	0.01	0.01	0.01	0.01	0.01	0.01	0.01	0.01	0.01	0.01	0.01	0.01	0.01	0.01	0.01	0.01	0.01	0.01	0.01	0.01	0.01	0.01	0.01	0.01	0.072
chromosome_7:20288-20414	N1	Cre07.g312050.v5.5	0.01	0.01	0.01	0.01	0.01	0.01	0.01	0.01	0.01	0.01	0.01	0.01	0.01	0.01	0.01	0.01	0.01	0.01	0.01	0.01	0.01	0.01	0.0604	0.01	0.01	0.01	0.01	0.01
chromosome_7:2199846-2200251	N1	Cre07.g327079.v5.5	0.01	0.01	0.01	0.01	0.01	0.01	0.01	0.01	0.01	0.01	0.01	0.01	0.01	0.01	0.01	0.01	0.01	0.01	0.01	0.01	0.01	0.01	0.01	0.01	0.01	0.01	0.0632	0.01
chromosome_7:2278493-2278644	N1	Cre07.g327700.v5.5	0.01	0.01	0.01	0.01	0.01	0.01	0.01	0.0833	0.0862	0.01	0.01	0.01	0.01	0.01	0.01	0.01	0.01	0.01	0.0859	0.01	0.01	0.01	0.1121	0.1049	0.01	0.01	0.0539	0.0826
chromosome_7:2373698-2373832	N1	Cre07.g328400.v5.5	0.01	0.01	0.01	0.01	0.01	0.0571	0.01	0.0676	0.01	0.01	0.01	0.01	0.01	0.01	0.0458	0.0563	0.0432	0.0718	0.0767	0.0942	0.0904	0.01	0.01	0.01	0.01	0.01	0.01	0.01
chromosome_7:2522826-2522940	N5	Cre07.g329650.v5.5	0.01	0.01	0.0898	0.0657	0.1053	0.0948	0.0957	0.0901	0.0719	0.0784	0.0564	0.01	0.0655	0.0567	0.0509	0.0618	0.0701	0.0729	0.0916	0.07	0.1239	0.1254	0.0926	0.1056	0.1108	0.0476	0.1382	0.0948
chromosome_7:2681978-2682063	N1	Cre07.g330850.v5.5	0.01	0.01	0.01	0.01	0.01	0.01	0.01	0.052	0.01	0.01	0.01	0.01	0.01	0.01	0.01	0.01	0.0426	0.01	0.01	0.01	0.01	0.01	0.0793	0.08	0.01	0.01	0.0658	0.0758
chromosome_7:277600-277720	N1	Cre07.g314050.v5.5	0.01	0.01	0.01	0.01	0.01	0.01	0.01	0.01	0.01	0.01	0.01	0.01	0.01	0.01	0.01	0.01	0.01	0.01	0.01	0.01	0.01	0.01	0.01	0.01	0.01	0.209	0.01	0.01
chromosome_7:2875758-2876181	N1	Cre07.g332300.v5.5	0.01	0.01	0.01	0.01	0.01	0.01	0.01	0.01	0.01	0.01	0.01	0.01	0.01	0.01	0.0459	0.0408	0.01	0.01	0.0771	0.01	0.0841	0.0415	0.0695	0.0847	0.0304	0.01	0.0306	0.0783
chromosome_7:292356-292471	N5	Cre07.g314200.v5.5	0.01	0.01	0.1733	0.01	0.01	0.01	0.01	0.01	0.1429	0.01	0.01	0.01	0.1864	0.01	0.1127	0.01	0.1234	0.01	0.01	0.01	0.093	0.01	0.01	0.0704	0.01	0.3089	0.0488	0.01
chromosome_7:2949897-2950105	N1	Cre07.g332851.v5.5	0.01	0.01	0.01	0.01	0.01	0.01	0.01	0.01	0.01	0.01	0.01	0.01	0.01	0.01	0.01	0.01	0.0313	0.01	0.0596	0.01	0.01	0.0886	0.01	0.01	0.01	0.01	0.01	0.01
chromosome_7:3039777-3039876	N1	Cre07.g333535.v5.5	0.01	0.01	0.01	0.01	0.01	0.01	0.01	0.01	0.01	0.01	0.01	0.01	0.01	0.01	0.01	0.01	0.01	0.01	0.01	0.01	0.01	0.01	0.01	0.01	0.0806	0.01	0.01	0.01
chromosome_7:3217564-3217882	N5	Cre07.g333900.v5.5	0.0443	0.01	0.01	0.01	0.01	0.0312	0.0308	0.01	0.0197	0.0178	0.0139	0.01	0.01	0.0139	0.0173	0.0241	0.0365	0.0398	0.0518	0.0512	0.0799	0.0786	0.0722	0.0726	0.0488	0.0633	0.0832	0.1071
chromosome_7:3223614-3223909	N5	Cre07.g333950.v5.5	0.0923	0.01	0.084	0.01	0.1308	0.1388	0.1021	0.01	0.01	0.01	0.0996	0.0809	0.064	0.01	0.0299	0.0669	0.0686	0.01	0.0777	0.01	0.0703	0.189	0.1053	0.109	0.1033	0.1538	0.1681	0.1275
chromosome_7:3230192-3230390	N1	Cre07.g334025.v5.5	0.01	0.01	0.01	0.01	0.01	0.01	0.01	0.01	0.01	0.01	0.0824	0.01	0.01	0.01	0.01	0.01	0.01	0.01	0.01	0.01	0.01	0.01	0.01	0.01	0.01	0.01	0.01	0.01
chromosome_7:3230459-3230660	N1	Cre07.g334025.v5.5	0.01	0.01	0.01	0.01	0.01	0.01	0.01	0.01	0.01	0.01	0.01	0.01	0.0749	0.01	0.01	0.01	0.01	0.01	0.01	0.01	0.01	0.01	0.01	0.01	0.01	0.01	0.01	0.01
chromosome_7:3237807-3237929	N1	Cre07.g334100.v5.5	0.01	0.01	0.01	0.01	0.01	0.01	0.0686	0.01	0.01	0.01	0.01	0.01	0.01	0.01	0.01	0.01	0.01	0.01	0.01	0.01	0.01	0.01	0.01	0.01	0.01	0.01	0.01	0.01
chromosome_7:3283738-3283974	N1	Cre07.g334400.v5.5	0.01	0.01	0.01	0.01	0.01	0.01	0.01	0.01	0.01	0.01	0.01	0.01	0.01	0.01	0.0963	0.01	0.01	0.01	0.01	0.01	0.01	0.01	0.01	0.01	0.01	0.01	0.01	0.01
chromosome_7:3443141-3443277	N5	Cre07.g335400.v5.5	0.0848	0.0614	0.0587	0.0577	0.0696	0.063	0.0647	0.0605	0.1313	0.01	0.01	0.01	0.01	0.01	0.01	0.01	0.0758	0.01	0.0607	0.01	0.01	0.1	0.01	0.0654	0.0803	0.0857	0.0713	0.0967
chromosome_7:345619-346052	N5	Cre07.g314600.v5.5	0.01	0.01	0.0409	0.01	0.01	0.01	0.0526	0.0433	0.01	0.01	0.01	0.01	0.01	0.01	0.01	0.01	0.0464	0.01	0.0316	0.0506	0.0642	0.1032	0.126	0.0908	0.1108	0.1031	0.1516	0.127
chromosome_7:3494426-3494747	N5	Cre07.g335800.v5.5	0.01	0.01	0.01	0.01	0.01	0.01	0.01	0.01	0.01	0.01	0.01	0.01	0.01	0.0942	0.1291	0.01	0.1191	0.01	0.1137	0.01	0.3372	0.266	0.01	0.225	0.2093	0.01	0.1886	0.01
chromosome_7:3494799-3494962	N1	Cre07.g335800.v5.5	0.01	0.01	0.01	0.01	0.01	0.01	0.01	0.01	0.01	0.01	0.01	0.01	0.01	0.01	0.01	0.01	0.0635	0.01	0.0439	0.0957	0.01	0.01	0.01	0.1304	0.01	0.01	0.1053	0.01
chromosome_7:3501654-3501885	N1	Cre07.g335900.v5.5	0.01	0.01	0.01	0.01	0.01	0.1753	0.16	0.1967	0.01	0.01	0.01	0.01	0.01	0.01	0.01	0.01	0.01	0.01	0.01	0.01	0.01	0.0352	0.0542	0.01	0.0273	0.01	0.061	0.1593
chromosome_7:4186297-4186464	N6	Cre07.g342350.v5.5	0.1264	0.1687	0.0547	0.0991	0.1512	0.1547	0.1837	0.1629	0.1799	0.1289	0.1277	0.01	0.1266	0.1354	0.1408	0.1015	0.1134	0.1273	0.1131	0.1322	0.1549	0.1627	0.1635	0.1894	0.137	0.1736	0.2534	0.2112
chromosome_7:42536-42640	N5	Cre07.g312250.v5.5	0.01	0.01	0.01	0.01	0.01	0.01	0.01	0.01	0.01	0.01	0.01	0.01	0.01	0.01	0.01	0.01	0.1771	0.01	0.1348	0.01	0.01	0.2037	0.01	0.375	0.1791	0.01	0.1688	0.01
chromosome_7:4606295-4606394	N2	Cre07.g344150.v5.5	0.01	0.1724	0.1837	0.01	0.01	0.2	0.1667	0.3125	0.163	0.1571	0.1782	0.01	0.1875	0.1429	0.0962	0.1081	0.1393	0.01	0.1159	0.1638	0.119	0.1353	0.01	0.1436	0.1287	0.2168	0.141	0.117
chromosome_7:5029706-5030137	N1	Cre07.g347250.v5.5	0.01	0.01	0.01	0.01	0.01	0.01	0.0759	0.01	0.01	0.01	0.01	0.01	0.01	0.01	0.01	0.01	0.01	0.01	0.01	0.01	0.01	0.01	0.01	0.01	0.01	0.01	0.01	0.01
chromosome_7:5286338-5286491	N1	Cre07.g349400.v5.5	0.01	0.01	0.01	0.01	0.01	0.01	0.01	0.01	0.01	0.01	0.5	0.01	0.01	0.01	0.01	0.01	0.1732	0.01	0.01	0.01	0.1176	0.01	0.01	0.01	0.01	0.01	0.1494	0.01
chromosome_7:5286599-5286740	N2	Cre07.g349400.v5.5	0.01	0.01	0.2167	0.4493	0.01	0.4359	0.3714	0.4	0.01	0.01	0.4746	0.375	0.2222	0.01	0.1004	0.1085	0.1272	0.01	0.1118	0.01	0.119	0.01	0.01	0.01	0.01	0.2571	0.1901	0.2169
chromosome_7:540666-540786	N1	Cre07.g316200.v5.5	0.01	0.01	0.01	0.0847	0.01	0.01	0.01	0.01	0.01	0.01	0.01	0.01	0.01	0.01	0.01	0.01	0.0757	0.01	0.01	0.01	0.01	0.01	0.01	0.01	0.01	0.01	0.01	0.01
chromosome_7:547388-547575	N1	Cre07.g316400.v5.5	0.01	0.01	0.01	0.01	0.01	0.01	0.01	0.01	0.01	0.01	0.01	0.01	0.01	0.0841	0.0599	0.01	0.0699	0.01	0.01	0.01	0.01	0.01	0.01	0.01	0.01	0.01	0.01	0.01
chromosome_7:5657349-5657560	N1	Cre07.g352300.v5.5	0.01	0.01	0.01	0.01	0.01	0.01	0.01	0.01	0.01	0.01	0.01	0.01	0.01	0.01	0.01	0.01	0.016	0.01	0.0262	0.0435	0.0675	0.0608	0.0748	0.0699	0.0292	0.01	0.01	0.01
chromosome_7:5889948-5890201	N1	Cre07.g353900.v5.5	0.01	0.01	0.01	0.01	0.01	0.01	0.01	0.01	0.01	0.01	0.01	0.01	0.01	0.01	0.01	0.01	0.01	0.01	0.01	0.01	0.01	0.01	0.01	0.01	0.01	0.0794	0.0549	0.01
chromosome_7:6396152-6396372	N1	Cre07.g357900.v5.5	0.01	0.01	0.01	0.01	0.01	0.01	0.01	0.0595	0.01	0.01	0.01	0.01	0.01	0.01	0.01	0.01	0.01	0.01	0.01	0.01	0.01	0.01	0.01	0.01	0.01	0.01	0.01	0.01
chromosome_7:678415-678539	N1	Cre07.g317350.v5.5	0.01	0.01	0.01	0.01	0.01	0.01	0.1636	0.0928	0.01	0.01	0.01	0.01	0.01	0.01	0.01	0.01	0.01	0.01	0.01	0.2326	0.01	0.01	0.01	0.01	0.2478	0.1485	0.01	0.01
chromosome_7:678563-678765	N1	Cre07.g317350.v5.5	0.01	0.01	0.01	0.01	0.01	0.01	0.01	0.1111	0.01	0.01	0.01	0.01	0.01	0.01	0.1282	0.01	0.01	0.01	0.01	0.01	0.01	0.01	0.01	0.01	0.1894	0.1321	0.01	0.01
chromosome_7:687576-687763	N1	Cre07.g317450.v5.5	0.01	0.01	0.01	0.01	0.01	0.01	0.01	0.01	0.01	0.01	0.01	0.01	0.01	0.01	0.01	0.01	0.01	0.01	0.01	0.01	0.01	0.01	0.01	0.01	0.1648	0.1197	0.1151	0.01
chromosome_7:719123-719324	N1	Cre07.g317601.v5.5	0.01	0.01	0.01	0.0526	0.01	0.01	0.01	0.01	0.01	0.01	0.01	0.01	0.01	0.01	0.01	0.01	0.0625	0.01	0.01	0.01	0.01	0.01	0.01	0.01	0.0785	0.09	0.01	0.01
chromosome_7:719348-719478	N5	Cre07.g317601.v5.5	0.01	0.01	0.01	0.01	0.01	0.1263	0.01	0.2963	0.01	0.01	0.01	0.01	0.01	0.01	0.01	0.01	0.101	0.01	0.01	0.01	0.2184	0.2525	0.01	0.01	0.1823	0.1408	0.1223	0.01
chromosome_7:819846-820076	N5	Cre07.g318350.v5.5	0.01	0.01	0.01	0.01	0.01	0.1674	0.1217	0.1502	0.1522	0.1009	0.01	0.01	0.01	0.1071	0.0332	0.01	0.0403	0.01	0.01	0.01	0.1014	0.107	0.125	0.1109	0.1005	0.0905	0.0954	0.1122
chromosome_8:1478311-1478807	N6	Cre08.g364700.v5.5	0.1863	0.2014	0.225	0.1656	0.2087	0.01	0.1839	0.1258	0.01	0.1129	0.082	0.01	0.0629	0.01	0.1144	0.1047	0.1032	0.1771	0.1764	0.2194	0.172	0.2036	0.2222	0.2603	0.1099	0.1135	0.2116	0.3493
chromosome_8:1626202-1626323	N5	Cre08.g365400.v5.5	0.0194	0.0254	0.008	0.0193	0.01	0.0274	0.0207	0.01	0.01	0.01	0.01	0.01	0.01	0.01	0.0718	0.0738	0.0585	0.0549	0.0571	0.0621	0.0649	0.0874	0.0577	0.0573	0.0652	0.0693	0.0577	0.0662
chromosome_8:1644515-1644632	N1	Cre08.g365600.v5.5	0.01	0.01	0.01	0.01	0.01	0.01	0.01	0.01	0.01	0.01	0.01	0.01	0.01	0.01	0.01	0.01	0.01	0.01	0.01	0.01	0.01	0.01	0.01	0.1508	0.2414	0.01	0.01	0.01
chromosome_8:1928135-1928892	N1	Cre08.g367300.v5.5	0.01	0.01	0.01	0.01	0.01	0.01	0.01	0.01	0.01	0.01	0.01	0.01	0.01	0.01	0.01	0.01	0.01	0.01	0.01	0.01	0.01	0.01	0.01	0.01	0.01	0.01	0.2136	0.01
chromosome_8:1959508-1959738	N8	Cre08.g367650.v5.5	0.6557	0.4167	0.01	0.437	0.25	0.4561	0.24	0.01	0.01	0.0902	0.01	0.01	0.1522	0.01	0.1759	0.234	0.3509	0.01	0.2838	0.3922	0.5652	0.5349	0.6061	0.6167	0.641	0.5833	0.5667	0.5738
chromosome_8:2017220-2017522	N1	Cre08.g368200.v5.5	0.01	0.01	0.01	0.01	0.01	0.01	0.0509	0.0598	0.01	0.01	0.01	0.01	0.01	0.01	0.01	0.01	0.01	0.01	0.01	0.01	0.01	0.01	0.01	0.01	0.01	0.01	0.01	0.01
chromosome_8:2295729-2295880	N1	Cre08.g370250.v5.5	0.01	0.01	0.01	0.01	0.01	0.01	0.01	0.01	0.01	0.01	0.01	0.01	0.01	0.01	0.01	0.01	0.01	0.01	0.01	0.01	0.01	0.01	0.01	0.01	0.01	0.01	0.0455	0.0889
chromosome_8:2311078-2311339	N4	Cre08.g370450.v5.5	0.0667	0.01	0.01	0.01	0.01	0.01	0.01	0.01	0.0595	0.5167	0.801	0.7767	0.8736	0.9259	0.954	0.9246	0.9243	0.9267	0.919	0.9523	0.9423	0.9476	0.9286	0.8157	0.7901	0.8462	0.8519	0.5595
chromosome_8:2311436-2311675	N3	Cre08.g370450.v5.5	0.01	0.01	0.01	0.01	0.01	0.01	0.01	0.01	0.01	0.01	0.5349	0.5317	0.6231	0.8128	0.8898	0.7752	0.7464	0.01	0.01	0.8386	0.01	0.01	0.01	0.01	0.01	0.01	0.01	0.01
chromosome_8:2601340-2601726	N1	Cre08.g372800.v5.5	0.01	0.01	0.01	0.01	0.01	0.01	0.01	0.01	0.01	0.01	0.01	0.01	0.01	0.01	0.01	0.01	0.01	0.01	0.01	0.01	0.01	0.01	0.01	0.0505	0.01	0.01	0.1066	0.0779
chromosome_8:2764142-2764200	N6	Cre08.g373346.v5.5	0.01	0.1313	0.114	0.1107	0.133	0.1028	0.1136	0.0904	0.0973	0.0668	0.0688	0.0591	0.0587	0.0752	0.1065	0.1528	0.147	0.1658	0.1896	0.2324	0.2082	0.2227	0.2351	0.2538	0.238	0.243	0.3075	0.3156
chromosome_8:2764482-2764533	N7	Cre08.g373346.v5.5	0.3021	0.209	0.2523	0.2841	0.2491	0.2709	0.2868	0.249	0.2469	0.2122	0.2101	0.1702	0.1845	0.1937	0.2403	0.3197	0.3187	0.3317	0.3548	0.3998	0.3891	0.4276	0.4028	0.4146	0.416	0.4364	0.5282	0.5354
chromosome_8:2851574-2851631	N1	Cre08.g373359.v5.5	0.01	0.01	0.1244	0.104	0.0826	0.0518	0.0807	0.0663	0.0585	0.041	0.0346	0.0461	0.0458	0.0381	0.0281	0.0376	0.0436	0.0258	0.0252	0.034	0.0249	0.0289	0.0308	0.01	0.0406	0.0401	0.0426	0.0327
chromosome_8:2851760-2851814	N5	Cre08.g373359.v5.5	0.01	0.01	0.1024	0.0975	0.0861	0.069	0.075	0.0709	0.0461	0.0341	0.0539	0.0418	0.0516	0.0313	0.0379	0.0596	0.0486	0.0533	0.0628	0.061	0.0733	0.0395	0.0507	0.0616	0.0516	0.0435	0.0566	0.0767
chromosome_8:2851977-2852033	N4	Cre08.g373359.v5.5	0.4699	0.6421	0.4353	0.5027	0.4304	0.4712	0.4567	0.4204	0.3621	0.2752	0.3021	0.2653	0.2313	0.2355	0.2429	0.4162	0.4875	0.5275	0.5415	0.6022	0.7048	0.8007	0.7944	0.795	0.8107	0.8471	0.8745	0.8557
chromosome_8:3392349-3392583	N1	Cre08.g374400.v5.5	0.01	0.01	0.01	0.01	0.01	0.01	0.01	0.01	0.01	0.01	0.01	0.01	0.01	0.01	0.01	0.01	0.01	0.01	0.01	0.01	0.01	0.01	0.01	0.01	0.01	0.01	0.01	0.0789
chromosome_8:3608152-3608352	N1	Cre08.g375950.v5.5	0.01	0.01	0.15	0.01	0.01	0.0824	0.01	0.1407	0.01	0.01	0.01	0.01	0.01	0.01	0.01	0.01	0.01	0.01	0.01	0.01	0.0558	0.0679	0.01	0.0549	0.01	0.01	0.0404	0.01
chromosome_8:4276241-4276709	N1	Cre08.g381050.v5.5	0.01	0.01	0.01	0.01	0.01	0.0855	0.1006	0.01	0.01	0.01	0.01	0.01	0.01	0.01	0.01	0.01	0.01	0.01	0.01	0.01	0.01	0.01	0.01	0.01	0.01	0.01	0.01	0.01
chromosome_8:4354316-4354736	N6	Cre08.g381702.v5.5	0.1845	0.01	0.01	0.01	0.01	0.1412	0.2167	0.2333	0.01	0.01	0.1757	0.1853	0.1475	0.2464	0.1331	0.1596	0.1777	0.1894	0.1057	0.2157	0.1925	0.2636	0.2153	0.2414	0.2153	0.3059	0.1983	0.2047
chromosome_8:4367044-4367513	N7	Cre08.g381750.v5.5	0.281	0.01	0.4063	0.01	0.5	0.5059	0.4105	0.3421	0.01	0.3273	0.01	0.01	0.3735	0.01	0.3143	0.3645	0.3333	0.01	0.3084	0.01	0.01	0.01	0.4507	0.01	0.2885	0.2609	0.3406	0.2923
chromosome_8:4367579-4367833	N7	Cre08.g381750.v5.5	0.3399	0.01	0.5195	0.5385	0.6	0.5	0.5	0.4831	0.4429	0.4271	0.6049	0.01	0.4239	0.01	0.3041	0.2857	0.2596	0.339	0.3357	0.4159	0.3645	0.306	0.3596	0.3894	0.25	0.2937	0.3352	0.4118
chromosome_8:4374914-4375462	N5	Cre08.g381800.v5.5	0.01	0.01	0.01	0.01	0.01	0.01	0.01	0.1489	0.01	0.01	0.01	0.01	0.01	0.0529	0.0287	0.01	0.0415	0.01	0.0469	0.01	0.0778	0.1197	0.0985	0.1185	0.0805	0.01	0.1244	0.1218
chromosome_8:4692917-4693036	N1	Cre08.g383850.v5.5	0.0209	0.01	0.0498	0.0416	0.01	0.0805	0.01	0.01	0.01	0.01	0.032	0.01	0.01	0.01	0.0319	0.01	0.0251	0.044	0.023	0.0435	0.01	0.0455	0.0441	0.036	0.0435	0.0413	0.0517	0.0862
chromosome_8:4974144-4974466	N6	Cre08.g385700.v5.5	0.01	0.01	0.01	0.01	0.01	0.01	0.01	0.01	0.01	0.01	0.01	0.01	0.01	0.01	0.01	0.01	0.3096	0.218	0.3024	0.01	0.01	0.2722	0.2491	0.2575	0.2868	0.263	0.2713	0.01
chromosome_8:5018548-5018693	N1	Cre08.g386100.v5.5	0.01	0.01	0.01	0.01	0.01	0.01	0.01	0.01	0.01	0.1313	0.14	0.1148	0.0948	0.0977	0.099	0.099	0.01	0.01	0.01	0.01	0.01	0.01	0.01	0.01	0.01	0.01	0.01	0.01
chromosome_8:5018960-5019157	N2	Cre08.g386100.v5.5	0.01	0.01	0.01	0.01	0.01	0.01	0.01	0.121	0.1438	0.1812	0.1934	0.1881	0.2315	0.2137	0.1103	0.01	0.11	0.01	0.1143	0.1083	0.097	0.01	0.01	0.01	0.01	0.01	0.01	0.01
chromosome_8:5019217-5019477	N1	Cre08.g386100.v5.5	0.01	0.01	0.01	0.01	0.01	0.01	0.01	0.01	0.01	0.01	0.01	0.01	0.01	0.01	0.01	0.01	0.0866	0.01	0.01	0.01	0.01	0.01	0.01	0.01	0.01	0.01	0.01	0.01
chromosome_8:5020396-5020591	N3	Cre08.g386100.v5.5	0.01	0.01	0.01	0.01	0.01	0.3036	0.01	0.3143	0.2444	0.4286	0.378	0.4685	0.5077	0.5	0.4885	0.4932	0.4831	0.6136	0.4407	0.01	0.3729	0.2414	0.01	0.01	0.1667	0.01	0.172	0.01
chromosome_8:5020769-5020907	N2	Cre08.g386100.v5.5	0.01	0.01	0.01	0.01	0.01	0.2206	0.2338	0.1792	0.01	0.1807	0.01	0.01	0.28	0.2289	0.1429	0.01	0.1301	0.01	0.01	0.01	0.01	0.01	0.01	0.01	0.01	0.01	0.01	0.01
chromosome_8:8565-8952	N1	Cre08.g358200.v5.5	0.01	0.01	0.01	0.01	0.01	0.01	0.01	0.01	0.01	0.01	0.01	0.01	0.01	0.01	0.01	0.01	0.01	0.01	0.01	0.01	0.01	0.0762	0.0754	0.0841	0.01	0.01	0.0532	0.0798
chromosome_8:9027-9171	N6	Cre08.g358200.v5.5	0.01	0.01	0.01	0.01	0.01	0.01	0.01	0.01	0.01	0.01	0.01	0.01	0.01	0.1786	0.0669	0.1932	0.1257	0.01	0.01	0.01	0.2048	0.2147	0.1801	0.2113	0.169	0.1653	0.1944	0.2526
chromosome_9:111725-111964	N2	Cre09.g386600.v5.5	0.3833	0.01	0.01	0.01	0.3077	0.2632	0.1757	0.1475	0.3333	0.01	0.01	0.2762	0.2078	0.01	0.01	0.01	0.01	0.01	0.01	0.01	0.01	0.01	0.01	0.01	0.01	0.01	0.01	0.1518
chromosome_9:125593-125682	N1	Cre09.g386700.v5.5	0.01	0.01	0.01	0.01	0.01	0.01	0.01	0.01	0.01	0.01	0.0653	0.01	0.0348	0.01	0.01	0.01	0.01	0.01	0.01	0.01	0.01	0.01	0.01	0.01	0.01	0.01	0.01	0.01
chromosome_9:1444365-1444438	N1	Cre09.g398400.v5.5	0.01	0.01	0.01	0.01	0.01	0.01	0.01	0.01	0.01	0.01	0.01	0.01	0.01	0.01	0.0659	0.01	0.01	0.01	0.01	0.01	0.01	0.0517	0.0548	0.0652	0.01	0.01	0.0461	0.0472
chromosome_9:1444529-1444636	N1	Cre09.g398400.v5.5	0.01	0.01	0.01	0.01	0.01	0.01	0.01	0.01	0.01	0.01	0.01	0.01	0.01	0.01	0.01	0.01	0.01	0.01	0.1214	0.01	0.01	0.09	0.01	0.0824	0.01	0.01	0.0492	0.01
chromosome_9:1445482-1445681	N1	Cre09.g398400.v5.5	0.01	0.01	0.01	0.01	0.01	0.01	0.01	0.01	0.01	0.01	0.01	0.01	0.01	0.01	0.01	0.0833	0.0479	0.01	0.01	0.01	0.0764	0.01	0.01	0.01	0.01	0.01	0.01	0.01
chromosome_9:1458345-1458437	N1	Cre09.g398250.v5.5	0.01	0.01	0.01	0.01	0.01	0.01	0.01	0.01	0.01	0.01	0.01	0.01	0.01	0.01	0.01	0.01	0.01	0.01	0.0528	0.05	0.01	0.01	0.0452	0.0474	0.0446	0.01	0.0393	0.0468
chromosome_9:1460359-1460535	N1	Cre09.g398250.v5.5	0.01	0.01	0.01	0.01	0.01	0.01	0.01	0.01	0.01	0.01	0.01	0.01	0.01	0.01	0.01	0.01	0.01	0.01	0.01	0.01	0.01	0.01	0.0876	0.0658	0.01	0.01	0.01	0.01
chromosome_9:1469415-1469636	N1	Cre09.g398200.v5.5	0.01	0.01	0.01	0.01	0.01	0.01	0.01	0.01	0.01	0.01	0.01	0.01	0.01	0.01	0.01	0.01	0.0342	0.01	0.0399	0.0564	0.0854	0.0502	0.0397	0.0532	0.0573	0.01	0.0797	0.01
chromosome_9:1469695-1469859	N1	Cre09.g398200.v5.5	0.01	0.01	0.01	0.01	0.01	0.01	0.01	0.01	0.01	0.01	0.01	0.01	0.01	0.01	0.01	0.01	0.0353	0.01	0.01	0.01	0.01	0.01	0.01	0.01	0.01	0.01	0.058	0.01
chromosome_9:154839-155648	N1	Cre09.g386734.v5.5	0.01	0.01	0.01	0.01	0.01	0.01	0.01	0.01	0.01	0.01	0.01	0.01	0.01	0.01	0.09	0.01	0.01	0.01	0.01	0.01	0.01	0.01	0.01	0.01	0.01	0.01	0.01	0.01
chromosome_9:1689381-1689505	N1	Cre09.g397000.v5.5	0.01	0.01	0.01	0.01	0.01	0.169	0.1556	0.1132	0.01	0.01	0.01	0.01	0.01	0.01	0.0495	0.01	0.01	0.01	0.01	0.01	0.01	0.01	0.01	0.049	0.01	0.01	0.0503	0.0395
chromosome_9:1929530-1929880	N1	Cre09.g395100.v5.5	0.0209	0.01	0.01	0.01	0.01	0.01	0.0299	0.01	0.01	0.01	0.01	0.01	0.01	0.01	0.0192	0.0264	0.0371	0.0243	0.0435	0.0563	0.0416	0.0369	0.0457	0.0571	0.0369	0.0451	0.0447	0.0585
chromosome_9:2297244-2297417	N2	Cre09.g392350.v5.5	0.4286	0.01	0.01	0.01	0.01	0.01	0.2239	0.2065	0.1683	0.01	0.2144	0.01	0.1672	0.01	0.0151	0.1299	0.01	0.01	0.1545	0.01	0.1589	0.01	0.01	0.01	0.01	0.01	0.01	0.01
chromosome_9:2483429-2483515	N1	Cre09.g391100.v5.5	0.01	0.01	0.01	0.01	0.01	0.01	0.01	0.01	0.01	0.01	0.01	0.09	0.01	0.01	0.01	0.01	0.01	0.01	0.01	0.01	0.01	0.01	0.01	0.2807	0.01	0.01	0.01	0.01
chromosome_9:2575864-2576204	N1	Cre09.g390600.v5.5	0.01	0.01	0.01	0.01	0.01	0.01	0.01	0.01	0.01	0.01	0.01	0.01	0.01	0.01	0.01	0.01	0.01	0.01	0.01	0.01	0.01	0.01	0.01	0.01	0.01	0.01	0.0872	0.01
chromosome_9:2668449-2668926	N4	Cre09.g389900.v5.5	0.3986	0.7442	0.72	0.8723	0.01	0.7654	0.7442	0.6905	0.6825	0.4561	0.3929	0.01	0.3714	0.6	0.3983	0.3269	0.3559	0.3	0.4272	0.4928	0.3896	0.5	0.5263	0.6277	0.5833	0.5816	0.5276	0.6237
chromosome_9:2874616-2874758	N1	Cre09.g388450.v5.5	0.01	0.01	0.01	0.01	0.01	0.01	0.01	0.1163	0.01	0.01	0.01	0.01	0.01	0.01	0.01	0.01	0.01	0.01	0.01	0.01	0.01	0.01	0.01	0.01	0.01	0.01	0.01	0.01
chromosome_9:2913700-2913974	N1	Cre09.g388150.v5.5	0.01	0.01	0.01	0.01	0.01	0.104	0.01	0.0859	0.01	0.01	0.01	0.01	0.01	0.01	0.01	0.01	0.01	0.01	0.1358	0.01	0.01	0.1182	0.01	0.01	0.01	0.01	0.01	0.01
chromosome_9:2994225-2994395	N5	Cre09.g387550.v5.5	0.01	0.01	0.01	0.01	0.01	0.1429	0.01	0.01	0.2015	0.01	0.01	0.01	0.01	0.01	0.01	0.25	0.1798	0.01	0.2	0.1546	0.01	0.01	0.01	0.2087	0.01	0.01	0.01	0.01
chromosome_9:3267494-3267693	N5	Cre09.g387949.v5.5	0.01	0.01	0.01	0.01	0.01	0.01	0.01	0.01	0.01	0.01	0.01	0.01	0.01	0.01	0.01	0.0272	0.037	0.01	0.0721	0.01	0.01	0.076	0.0588	0.0706	0.1165	0.167	0.0582	0.0456
chromosome_9:3269262-3269480	N1	Cre09.g387949.v5.5	0.01	0.01	0.01	0.01	0.01	0.01	0.01	0.01	0.01	0.01	0.01	0.01	0.01	0.01	0.01	0.01	0.01	0.01	0.01	0.01	0.01	0.01	0.01	0.01	0.01	0.0587	0.01	0.01
chromosome_9:3492270-3492364	N1	Cre09.g389652.v5.5	0.01	0.01	0.01	0.01	0.01	0.01	0.01	0.01	0.01	0.01	0.01	0.01	0.01	0.01	0.01	0.01	0.01	0.01	0.01	0.01	0.01	0.01	0.01	0.01	0.01	0.0816	0.067	0.01
chromosome_9:3515906-3516131	N5	Cre09.g389801.v5.5	0.01	0.01	0.01	0.01	0.01	0.01	0.01	0.01	0.01	0.01	0.01	0.01	0.01	0.01	0.01	0.01	0.01	0.01	0.01	0.01	0.01	0.0902	0.01	0.01	0.0756	0.01	0.1701	0.1897
chromosome_9:3587530-3587643	N2	Cre09.g390134.v5.5	0.01	0.01	0.01	0.1618	0.01	0.339	0.38	0.01	0.01	0.01	0.01	0.01	0.01	0.01	0.01	0.01	0.01	0.01	0.01	0.01	0.01	0.01	0.01	0.01	0.01	0.01	0.0586	0.01
chromosome_9:3621083-3621155	N5	Cre09.g390282.v5.5	0.01	0.01	0.01	0.01	0.01	0.01	0.01	0.01	0.01	0.01	0.01	0.01	0.01	0.01	0.01	0.01	0.01	0.01	0.0909	0.01	0.1781	0.01	0.01	0.1317	0.01	0.01	0.1795	0.0976
chromosome_9:3785521-3785672	N1	Cre09.g391467.v5.5	0.01	0.01	0.01	0.01	0.01	0.01	0.1803	0.01	0.01	0.01	0.01	0.01	0.01	0.01	0.01	0.01	0.0785	0.01	0.0807	0.0845	0.0772	0.0627	0.0641	0.0818	0.0379	0.0432	0.0318	0.0564
chromosome_9:3948073-3948147	N1	Cre09.g392505.v5.5	0.01	0.01	0.01	0.01	0.01	0.01	0.01	0.01	0.01	0.01	0.01	0.01	0.01	0.01	0.01	0.01	0.01	0.01	0.01	0.01	0.01	0.01	0.01	0.01	0.01	0.01	0.0909	0.01
chromosome_9:3963114-3963227	N1	Cre09.g392579.v5.5	0.01	0.01	0.01	0.01	0.01	0.01	0.0635	0.01	0.01	0.01	0.01	0.01	0.01	0.01	0.01	0.01	0.01	0.01	0.01	0.01	0.01	0.01	0.01	0.01	0.01	0.01	0.01	0.01
chromosome_9:3971364-3971573	N6	Cre09.g392655.v5.5	0.1325	0.01	0.01	0.01	0.01	0.01	0.1313	0.125	0.01	0.1466	0.1543	0.01	0.0943	0.1098	0.116	0.1937	0.1443	0.1429	0.1494	0.1801	0.1818	0.2169	0.2381	0.2851	0.1919	0.1698	0.2532	0.2424
chromosome_9:408394-408518	N1	Cre09.g404750.v5.5	0.1078	0.01	0.01	0.01	0.01	0.01	0.01	0.01	0.01	0.01	0.01	0.01	0.01	0.01	0.01	0.01	0.0818	0.01	0.01	0.01	0.01	0.104	0.01	0.0813	0.01	0.01	0.0857	0.0769
chromosome_9:4280254-4281040	N1	Cre09.g394621.v5.5	0.01	0.01	0.01	0.01	0.01	0.01	0.01	0.01	0.01	0.01	0.01	0.01	0.01	0.01	0.01	0.01	0.01	0.01	0.01	0.01	0.01	0.01	0.01	0.01	0.01	0.01	0.01	0.0963
chromosome_9:4314744-4315024	N6	Cre09.g394843.v5.5	0.3077	0.01	0.01	0.01	0.01	0.2075	0.01	0.01	0.01	0.2308	0.01	0.01	0.01	0.01	0.0929	0.01	0.1842	0.01	0.2179	0.01	0.01	0.01	0.3265	0.01	0.2712	0.01	0.2889	0.5714
chromosome_9:4400098-4400403	N1	Cre09.g395436.v5.5	0.01	0.01	0.01	0.01	0.01	0.01	0.01	0.0982	0.01	0.01	0.01	0.01	0.01	0.01	0.01	0.01	0.01	0.01	0.01	0.01	0.01	0.01	0.01	0.01	0.01	0.01	0.01	0.01
chromosome_9:4403266-4403654	N8	Cre09.g395436.v5.5	0.01	0.01	0.1856	0.112	0.1765	0.1598	0.1699	0.1598	0.01	0.1437	0.1856	0.01	0.1729	0.0993	0.0968	0.0912	0.0941	0.1571	0.1488	0.25	0.3465	0.417	0.4008	0.4955	0.3934	0.3035	0.4611	0.5343
chromosome_9:4403737-4404699	N8	Cre09.g395436.v5.5	0.01	0.01	0.19	0.01	0.1944	0.2887	0.3629	0.204	0.3396	0.2536	0.2426	0.01	0.2059	0.1223	0.1434	0.2048	0.1847	0.2687	0.2864	0.3333	0.4329	0.6118	0.615	0.6117	0.5538	0.4523	0.6032	0.631
chromosome_9:4566710-4567195	N1	Cre09.g396252.v5.5	0.01	0.01	0.01	0.01	0.01	0.01	0.01	0.01	0.01	0.01	0.01	0.01	0.01	0.01	0.01	0.01	0.01	0.01	0.01	0.01	0.01	0.01	0.01	0.01	0.0654	0.0464	0.01	0.01
chromosome_9:4574028-4574233	N1	Cre09.g396289.v5.5	0.01	0.01	0.01	0.01	0.01	0.01	0.01	0.01	0.01	0.01	0.01	0.01	0.01	0.01	0.01	0.01	0.01	0.01	0.01	0.01	0.01	0.01	0.01	0.01	0.01	0.01	0.1042	0.01
chromosome_9:4665130-4665315	N1	Cre09.g396735.v5.5	0.01	0.01	0.01	0.01	0.01	0.01	0.01	0.01	0.01	0.01	0.01	0.01	0.01	0.01	0.01	0.01	0.01	0.01	0.0357	0.01	0.0399	0.01	0.0572	0.0343	0.01	0.01	0.0381	0.0355
chromosome_9:5151571-5151675	N5	Cre09.g399030.v5.5	0.01	0.01	0.01	0.01	0.01	0.01	0.01	0.01	0.01	0.01	0.01	0.01	0.01	0.01	0.01	0.01	0.01	0.01	0.01	0.01	0.2368	0.01	0.2025	0.135	0.01	0.01	0.085	0.01
chromosome_9:5492472-5492742	N1	Cre09.g400367.v5.5	0.01	0.01	0.01	0.01	0.01	0.01	0.01	0.01	0.01	0.01	0.01	0.01	0.01	0.01	0.01	0.01	0.01	0.01	0.01	0.01	0.01	0.01	0.01	0.01	0.055	0.01	0.01	0.01
chromosome_9:5702533-5702709	N1	Cre09.g401552.v5.5	0.01	0.01	0.01	0.01	0.01	0.01	0.01	0.01	0.01	0.01	0.01	0.01	0.01	0.01	0.01	0.01	0.01	0.01	0.01	0.01	0.01	0.01	0.01	0.0295	0.01	0.0633	0.01	0.01
chromosome_9:6080702-6080907	N1	Cre09.g403293.v5.5	0.01	0.01	0.01	0.01	0.01	0.01	0.01	0.01	0.01	0.01	0.01	0.01	0.01	0.01	0.01	0.01	0.01	0.01	0.01	0.01	0.0615	0.01	0.01	0.01	0.01	0.01	0.01	0.01
chromosome_9:6122644-6123019	N1	Cre09.g405150.v5.5	0.01	0.01	0.01	0.01	0.01	0.01	0.01	0.01	0.01	0.01	0.01	0.01	0.01	0.01	0.01	0.01	0.01	0.01	0.01	0.01	0.01	0.01	0.01	0.01	0.1129	0.0663	0.1512	0.01
chromosome_9:7019054-7019527	N1	Cre09.g411100.v5.5	0.0779	0.01	0.01	0.01	0.01	0.01	0.01	0.01	0.01	0.01	0.01	0.01	0.01	0.01	0.01	0.01	0.01	0.01	0.01	0.01	0.01	0.01	0.01	0.01	0.01	0.01	0.01	0.01
chromosome_9:7078365-7078446	N1	Cre09.g411600.v5.5	0.01	0.01	0.01	0.01	0.01	0.01	0.01	0.01	0.01	0.01	0.01	0.01	0.01	0.01	0.01	0.01	0.01	0.01	0.01	0.01	0.01	0.01	0.01	0.01	0.01	0.01	0.0511	0.01
chromosome_9:7104487-7104831	N1	Cre09.g411751.v5.5	0.01	0.01	0.01	0.01	0.01	0.01	0.01	0.01	0.01	0.01	0.01	0.01	0.01	0.01	0.01	0.01	0.01	0.01	0.01	0.01	0.01	0.01	0.01	0.01	0.01	0.1333	0.01	0.01
chromosome_9:7423103-7423225	N1	Cre09.g413400.v5.5	0.01	0.01	0.01	0.01	0.01	0.01	0.0838	0.01	0.01	0.01	0.01	0.01	0.01	0.01	0.01	0.01	0.01	0.01	0.01	0.01	0.01	0.01	0.01	0.01	0.01	0.01	0.01	0.01
chromosome_9:7444413-7444463	N4	Cre09.g413500.v5.5	0.5226	0.378	0.4371	0.4433	0.4746	0.4855	0.4769	0.4172	0.3779	0.3413	0.3333	0.3204	0.3939	0.5	0.5093	0.5314	0.625	0.6379	0.6432	0.6716	0.7553	0.7577	0.7625	0.7063	0.7901	0.6688	0.7762	0.7039
chromosome_9:7444535-7444645	N1	Cre09.g413500.v5.5	0.01	0.01	0.01	0.01	0.01	0.01	0.01	0.01	0.01	0.01	0.01	0.01	0.01	0.01	0.01	0.01	0.01	0.01	0.0565	0.0674	0.0667	0.085	0.0804	0.0819	0.01	0.01	0.0265	0.0542
chromosome_9:7444754-7444899	N1	Cre09.g413500.v5.5	0.01	0.01	0.01	0.01	0.01	0.01	0.01	0.031	0.01	0.01	0.01	0.01	0.01	0.01	0.01	0.01	0.0529	0.01	0.01	0.01	0.0622	0.0772	0.0857	0.0867	0.01	0.01	0.0263	0.0433
chromosome_9:7477456-7477569	N2	Cre09.g413750.v5.5	0.1888	0.1351	0.1724	0.149	0.2	0.1856	0.01	0.01	0.01	0.0857	0.01	0.01	0.06	0.01	0.0717	0.1337	0.0773	0.1231	0.125	0.1793	0.0774	0.134	0.195	0.1432	0.0489	0.0787	0.2	0.01
chromosome_9:7538937-7539063	N5	Cre09.g414300.v5.5	0.01	0.01	0.01	0.01	0.01	0.0389	0.01	0.0655	0.125	0.01	0.01	0.01	0.01	0.01	0.01	0.01	0.01	0.01	0.1746	0.01	0.01	0.01	0.01	0.01	0.01	0.01	0.1667	0.1579
chromosome_9:7539144-7539341	N6	Cre09.g414300.v5.5	0.01	0.01	0.1756	0.1652	0.01	0.1459	0.1483	0.141	0.2331	0.1616	0.0968	0.01	0.1043	0.01	0.1818	0.01	0.2088	0.01	0.01	0.01	0.24	0.01	0.2794	0.3333	0.2623	0.01	0.2302	0.2472
chromosome_9:7582705-7582791	N1	Cre09.g414600.v5.5	0.01	0.01	0.01	0.01	0.01	0.01	0.01	0.01	0.01	0.01	0.01	0.01	0.01	0.01	0.01	0.01	0.1089	0.01	0.01	0.01	0.01	0.01	0.01	0.01	0.01	0.01	0.01	0.01
chromosome_9:7678185-7678323	N5	Cre09.g415450.v5.5	0.01	0.01	0.01	0.01	0.01	0.01	0.01	0.2078	0.2	0.01	0.1259	0.01	0.01	0.01	0.0494	0.0821	0.01	0.2444	0.1405	0.01	0.01	0.01	0.01	0.01	0.1667	0.1754	0.2212	0.01
chromosome_9:7692862-7693124	N1	Cre09.g415600.v5.5	0.01	0.01	0.01	0.01	0.01	0.01	0.01	0.01	0.01	0.01	0.01	0.01	0.01	0.01	0.01	0.01	0.01	0.01	0.01	0.01	0.0517	0.0774	0.0992	0.1094	0.0739	0.019	0.0305	0.0572
chromosome_9:7702691-7702807	N1	Cre09.g415700.v5.5	0.0211	0.01	0.0139	0.0257	0.0376	0.0272	0.0242	0.01	0.01	0.01	0.01	0.01	0.01	0.037	0.0162	0.0289	0.0176	0.01	0.0555	0.0399	0.0591	0.0506	0.01	0.0446	0.01	0.01	0.0383	0.0523
chromosome_9:7745882-7746094	N1	Cre09.g416200.v5.5	0.01	0.01	0.01	0.01	0.01	0.0688	0.01	0.01	0.01	0.01	0.01	0.01	0.01	0.01	0.01	0.01	0.01	0.01	0.01	0.01	0.01	0.01	0.01	0.01	0.01	0.01	0.01	0.01
chromosome_9:7804333-7804516	N1	Cre09.g416400.v5.5	0.01	0.01	0.01	0.01	0.01	0.01	0.01	0.01	0.01	0.01	0.01	0.01	0.01	0.01	0.01	0.01	0.01	0.01	0.01	0.125	0.01	0.01	0.01	0.01	0.01	0.01	0.01	0.01
chromosome_9:7811273-7811668	N1	Cre09.g416450.v5.5	0.01	0.01	0.01	0.01	0.01	0.01	0.1294	0.1135	0.01	0.01	0.01	0.01	0.01	0.01	0.01	0.01	0.01	0.01	0.01	0.01	0.01	0.01	0.1744	0.01	0.084	0.01	0.01	0.01
chromosome_9:7811921-7812037	N5	Cre09.g416450.v5.5	0.01	0.01	0.01	0.01	0.01	0.01	0.1702	0.01	0.0599	0.01	0.01	0.01	0.0556	0.01	0.01	0.01	0.01	0.01	0.0714	0.0765	0.01	0.0952	0.0921	0.1304	0.01	0.0823	0.1051	0.0965
chromosome_9:7812222-7812287	N5	Cre09.g416450.v5.5	0.01	0.01	0.01	0.01	0.01	0.1163	0.01	0.0862	0.0894	0.01	0.0655	0.01	0.0479	0.01	0.0804	0.01	0.0446	0.01	0.0584	0.0476	0.0583	0.0963	0.0806	0.1046	0.01	0.087	0.0642	0.01
chromosome_9:7831658-7831746	N5	Cre09.g416650.v5.5	0.0532	0.01	0.0583	0.01	0.01	0.0645	0.0289	0.0273	0.0337	0.01	0.01	0.0307	0.01	0.043	0.0307	0.0516	0.0774	0.1026	0.0826	0.0938	0.107	0.1178	0.1311	0.1471	0.0981	0.1099	0.1056	0.1125
chromosome_9:7831765-7831834	N5	Cre09.g416650.v5.5	0.01	0.01	0.01	0.01	0.01	0.01	0.01	0.01	0.01	0.01	0.01	0.01	0.01	0.01	0.025	0.0326	0.01	0.01	0.0505	0.0642	0.0739	0.0688	0.0938	0.1075	0.0736	0.0609	0.0673	0.0658
chromosome_9:7832357-7832456	N6	Cre09.g416650.v5.5	0.1077	0.1149	0.0986	0.1137	0.2703	0.1273	0.2044	0.2096	0.1366	0.0939	0.0688	0.01	0.125	0.099	0.1304	0.1811	0.1595	0.1743	0.1927	0.1968	0.2577	0.3065	0.3192	0.251	0.1847	0.2213	0.1909	0.244
chromosome_9:7832525-7832583	N1	Cre09.g416650.v5.5	0.01	0.01	0.01	0.01	0.01	0.0383	0.01	0.0191	0.01	0.01	0.01	0.01	0.0326	0.01	0.0149	0.01	0.0265	0.01	0.01	0.045	0.0716	0.05	0.0708	0.0664	0.0449	0.0534	0.0476	0.0336
chromosome_9:7832598-7832687	N5	Cre09.g416650.v5.5	0.01	0.01	0.01	0.01	0.01	0.0259	0.0313	0.01	0.01	0.01	0.01	0.01	0.01	0.01	0.01	0.01	0.0272	0.01	0.01	0.0326	0.0842	0.0627	0.1036	0.0752	0.0397	0.0923	0.0674	0.076
chromosome_9:7833425-7833492	N5	Cre09.g416650.v5.5	0.0678	0.01	0.01	0.01	0.01	0.0457	0.0645	0.0528	0.01	0.01	0.01	0.01	0.01	0.01	0.0452	0.01	0.0385	0.01	0.0751	0.098	0.0601	0.0517	0.0733	0.0744	0.01	0.01	0.0798	0.1082
chromosome_9:7851967-7852047	N5	Cre09.g416800.v5.5	0.0805	0.01	0.0226	0.0429	0.01	0.01	0.01	0.0462	0.0442	0.01	0.0262	0.0309	0.0192	0.01	0.0208	0.0482	0.0545	0.0417	0.0588	0.0653	0.08	0.0767	0.0831	0.0746	0.04	0.0667	0.0724	0.0904
chromosome_9:7898602-7898732	N1	Cre09.g417050.v5.5	0.01	0.01	0.01	0.01	0.01	0.01	0.01	0.01	0.01	0.01	0.01	0.01	0.01	0.01	0.01	0.01	0.01	0.01	0.01	0.01	0.01	0.01	0.01	0.01	0.01	0.01	0.1182	0.1616
chromosome_9:7898743-7898899	N5	Cre09.g417050.v5.5	0.01	0.01	0.01	0.01	0.01	0.01	0.1481	0.01	0.01	0.01	0.01	0.01	0.01	0.01	0.01	0.01	0.186	0.01	0.1064	0.01	0.01	0.1593	0.1838	0.1768	0.129	0.1456	0.1932	0.1939
chromosome_9:7938590-7939335	N1	Cre09.g417350.v5.5	0.01	0.01	0.051	0.0436	0.0367	0.034	0.0507	0.0353	0.0353	0.0338	0.0218	0.01	0.0176	0.0165	0.0159	0.0209	0.0204	0.0306	0.0159	0.0185	0.0393	0.0254	0.026	0.0418	0.0327	0.0492	0.0286	0.0518
scaffold_18:106074-106382	N5	Cre18.g748797.v5.5	0.01	0.01	0.01	0.01	0.01	0.01	0.01	0.01	0.01	0.01	0.01	0.01	0.01	0.01	0.01	0.01	0.01	0.01	0.01	0.01	0.01	0.01	0.01	0.01	0.01	0.01	0.4219	0.01
scaffold_18:96026-96142	N1	Cre18.g748697.v5.5	0.01	0.01	0.01	0.01	0.01	0.01	0.01	0.01	0.01	0.01	0.01	0.01	0.01	0.01	0.01	0.01	0.01	0.01	0.01	0.01	0.01	0.01	0.01	0.01	0.2	0.01	0.01	0.01
scaffold_19:167184-167835	N1	Cre19.g751047.v5.5	0.01	0.01	0.01	0.01	0.01	0.01	0.01	0.01	0.01	0.01	0.01	0.01	0.01	0.01	0.01	0.01	0.01	0.01	0.01	0.01	0.01	0.01	0.01	0.01	0.01	0.1293	0.01	0.01
scaffold_19:167978-168255	N6	Cre19.g751047.v5.5	0.0723	0.01	0.0657	0.0707	0.01	0.1056	0.1818	0.01	0.01	0.01	0.01	0.01	0.0826	0.01	0.2887	0.1348	0.0935	0.1162	0.0952	0.162	0.1227	0.1462	0.01	0.2072	0.3095	0.2279	0.01	0.3065
scaffold_19:168465-168534	N7	Cre19.g751047.v5.5	0.1614	0.1865	0.1694	0.2185	0.2564	0.2521	0.2857	0.3158	0.2941	0.2952	0.2773	0.3276	0.1923	0.1806	0.1972	0.106	0.111	0.1114	0.0908	0.1453	0.1676	0.1711	0.2194	0.2355	0.2403	0.2432	0.2874	0.25
scaffold_24:58393-58689	N5	Cre24.g755497.v5.5	0.01	0.01	0.01	0.01	0.01	0.01	0.01	0.01	0.01	0.01	0.01	0.01	0.01	0.01	0.01	0.01	0.01	0.01	0.01	0.01	0.01	0.01	0.01	0.1535	0.24	0.4321	0.4384	0.01
scaffold_24:73651-74070	N5	Cre24.g755647.v5.5	0.1622	0.01	0.01	0.01	0.01	0.01	0.01	0.01	0.01	0.01	0.01	0.01	0.01	0.01	0.0356	0.01	0.0553	0.01	0.01	0.01	0.01	0.1579	0.2222	0.1196	0.01	0.01	0.128	0.2065
scaffold_24:83781-84237	N1	Cre24.g755747.v5.5	0.01	0.01	0.01	0.01	0.01	0.01	0.01	0.01	0.01	0.01	0.01	0.01	0.01	0.01	0.01	0.01	0.01	0.01	0.01	0.01	0.01	0.01	0.01	0.01	0.01	0.01	0.0973	0.01
scaffold_40:1197-1276	N1	Cre40.g760147.v5.5	0.01	0.01	0.01	0.01	0.01	0.01	0.01	0.01	0.01	0.01	0.01	0.01	0.01	0.01	0.01	0.01	0.01	0.01	0.01	0.01	0.01	0.01	0.01	0.01	0.01	0.01	0.0559	0.01
